# Supplementary material for: Global prevalence of mental health issues among the general population during the coronavirus disease-2019 pandemic: a systematic review and meta-analysis
Source: PubMed Central journal article supplement (PMC8119461; doi:10.1038/s41598-021-89700-8), 2021-05-13

## **Supplementary Appendix**

### **Global Prevalence of Mental Health Issues Among the General Population During the Coronavirus Disease-2019 Pandemic: A Systematic Review and Meta-Analysis**

Surapon Nochaiwong\*, Chidchanok Ruengorn, Kednapa Thavorn, Brian Hutton, Ratanaporn Awiphan, Chabaphai Phosuya, Yongyuth Ruanta, Nahathai Wongpakaran, Tinakon Wongpakaran

**\*Correspondence and requests for materials:**

Surapon Nochaiwong, PharmD, Department of Pharmaceutical Care, Faculty of Pharmacy, Chiang Mai University, Chiang Mai 50200, Thailand, Phone: 66899973365, Fax: 6653222741, Email: [surapon.nochaiwong@gmail.com](mailto:surapon.nochaiwong@gmail.com)

## Supplementary Online Content

|                  |                                                                                                                    |     |
|------------------|--------------------------------------------------------------------------------------------------------------------|-----|
| <b>Table S1</b>  | MOOSE Checklist for Meta-Analyses of Observational Studies                                                         | S3  |
| <b>Table S2</b>  | Systematic Review Search Strategy                                                                                  | S5  |
| <b>Table S3</b>  | Included Studies in the Systematic Review and Meta-Analysis                                                        | S17 |
| <b>Table S4</b>  | Characteristics of the 107 Included Studies                                                                        | S23 |
| <b>Table S5</b>  | Risk of Bias Assessment of Included Studies                                                                        | S34 |
| <b>Table S6</b>  | Summary of Primary Outcomes Prevalence Estimates Among the General Population Amid COVID-19 Pandemic, by Countries | S37 |
| <b>Table S7</b>  | Summary of Secondary Outcomes Prevalence Estimates Among the General Population Amid COVID-19 Pandemic             | S43 |
| <b>Table S8</b>  | Subgroup Analysis of Included Studies: Depression                                                                  | S44 |
| <b>Table S9</b>  | Subgroup Analysis of Included Studies: Anxiety                                                                     | S47 |
| <b>Table S10</b> | Subgroup Analysis of Included Studies: Post-Traumatic Stress Symptoms                                              | S50 |
| <b>Table S11</b> | Subgroup Analysis of Included Studies: Stress                                                                      | S53 |
| <b>Table S12</b> | Subgroup Analysis of Included Studies: Psychological Distress                                                      | S56 |
| <b>Table S13</b> | Subgroup Analysis of Included Studies: Sleep Problems                                                              | S59 |
| <b>Table S14</b> | Sensitivity Analysis by Restricting the Analysis to Studies with a Low Risk of Bias                                | S62 |
| <b>Table S15</b> | Univariable Meta-Regression of Included Studies                                                                    | S63 |
| <b>Table S16</b> | Meta-Analysis of Included Studies with Calibration for Publication Bias                                            | S69 |
| <b>Figure S1</b> | Study Selection                                                                                                    | S70 |
| <b>Figure S2</b> | Funnel Plot of Included Studies in the Meta-Analysis                                                               | S71 |

**Table S1** MOOSE Checklist for Meta-Analyses of Observational Studies

| <b>Item No</b>                                     | <b>Recommendation</b>                                                                                                                                                                                                                                                        | <b>Reported on page No</b>     |
|----------------------------------------------------|------------------------------------------------------------------------------------------------------------------------------------------------------------------------------------------------------------------------------------------------------------------------------|--------------------------------|
| <b>Reporting of background should include</b>      |                                                                                                                                                                                                                                                                              |                                |
| 1                                                  | Problem definition                                                                                                                                                                                                                                                           | 8                              |
| 2                                                  | Hypothesis statement                                                                                                                                                                                                                                                         | NA                             |
| 3                                                  | Description of study outcome(s)                                                                                                                                                                                                                                              | 11                             |
| 4                                                  | Type of exposure or intervention used                                                                                                                                                                                                                                        | 10, 11                         |
| 5                                                  | Type of study designs used                                                                                                                                                                                                                                                   | 10                             |
| 6                                                  | Study population                                                                                                                                                                                                                                                             | 10, 11                         |
| <b>Reporting of search strategy should include</b> |                                                                                                                                                                                                                                                                              |                                |
| 7                                                  | Qualifications of searches (eg, librarians and investigators)                                                                                                                                                                                                                | 10                             |
| 8                                                  | Search strategy, including time period included in the synthesis and key words                                                                                                                                                                                               | 10, Table S2                   |
| 9                                                  | Effort to include all available studies, including contact with authors                                                                                                                                                                                                      | 10                             |
| 10                                                 | Databases and registries searched                                                                                                                                                                                                                                            | 10, Table S2                   |
| 11                                                 | Search software used, name and version, including special features used (eg, explosion)                                                                                                                                                                                      | 10, Table S2                   |
| 12                                                 | Use of hand searching (eg, reference lists of obtained articles)                                                                                                                                                                                                             | 10                             |
| 13                                                 | List of citations located and those excluded, including justification                                                                                                                                                                                                        | 10, Table S3                   |
| 14                                                 | Method of addressing articles published in languages other than English                                                                                                                                                                                                      | 10                             |
| 15                                                 | Method of handling abstracts and unpublished studies                                                                                                                                                                                                                         | 10                             |
| 16                                                 | Description of any contact with authors                                                                                                                                                                                                                                      | 11, 12                         |
| <b>Reporting of methods should include</b>         |                                                                                                                                                                                                                                                                              |                                |
| 17                                                 | Description of relevance or appropriateness of studies assembled for assessing the hypothesis to be tested                                                                                                                                                                   | 11, 12                         |
| 18                                                 | Rationale for the selection and coding of data (eg, sound clinical principles or convenience)                                                                                                                                                                                | 11, 12                         |
| 19                                                 | Documentation of how data were classified and coded (eg, multiple raters, blinding and interrater reliability)                                                                                                                                                               | 11, 12                         |
| 20                                                 | Assessment of confounding (eg, comparability of cases and controls in studies where appropriate)                                                                                                                                                                             | 13, 14                         |
| 21                                                 | Assessment of study quality, including blinding of quality assessors, stratification or regression on possible predictors of study results                                                                                                                                   | 12                             |
| 22                                                 | Assessment of heterogeneity                                                                                                                                                                                                                                                  | 13                             |
| 23                                                 | Description of statistical methods (eg, complete description of fixed or random effects models, justification of whether the chosen models account for predictors of study results, dose-response models, or cumulative meta-analysis) in sufficient detail to be replicated | 12-14                          |
| 24                                                 | Provision of appropriate tables and graphics                                                                                                                                                                                                                                 | Throughout tables and graphics |
| <b>Reporting of results should include</b>         |                                                                                                                                                                                                                                                                              |                                |
| 25                                                 | Graphic summarising individual study estimates and overall estimate                                                                                                                                                                                                          | Figure 1 to Figure 6           |
| 26                                                 | Table giving descriptive information for each study included                                                                                                                                                                                                                 | Table 1, Table S4              |

Stroup DF, et al. Meta-analysis of observational studies in epidemiology: a proposal for reporting. Meta-analysis Of Observational Studies in Epidemiology (MOOSE) group. JAMA. 2000;283(15):2008-12.

Abbreviation: NA, not applicable.

**Table S1** MOOSE Checklist for Meta-Analyses of Observational Studies (Continued)

| <b>Item No</b>                                         | <b>Recommendation</b>                                                                                                   | <b>Reported on page No</b> |
|--------------------------------------------------------|-------------------------------------------------------------------------------------------------------------------------|----------------------------|
| <b>Reporting of results should include (continued)</b> |                                                                                                                         |                            |
| 27                                                     | Results of sensitivity testing (eg, subgroup analysis)                                                                  | Table S8 to Table S15      |
| 28                                                     | Indication of statistical uncertainty of findings                                                                       | Throughout results         |
| <b>Reporting of discussion should include</b>          |                                                                                                                         |                            |
| 29                                                     | Quantitative assessment of bias (eg, publication bias)                                                                  | 19, Table S16              |
| 30                                                     | Justification for exclusion (eg, exclusion of non-English language citations)                                           | NA                         |
| 31                                                     | Assessment of quality of included studies                                                                               | 15, 16, Table S5           |
| <b>Reporting of conclusions should include</b>         |                                                                                                                         |                            |
| 32                                                     | Consideration of alternative explanations for observed results                                                          | 19-21                      |
| 33                                                     | Generalization of the conclusion(eg, appropriate for the data presented and within the domain of the literature review) | 21-23                      |
| 34                                                     | Guidelines for future research                                                                                          | 23, 24                     |
| 35                                                     | Disclosure of funding source                                                                                            | 25                         |

Stroup DF, et al. Meta-analysis of observational studies in epidemiology: a proposal for reporting. Meta-analysis Of Observational Studies in Epidemiology (MOOSE) group. JAMA. 2000;283(15):2008-12.

Abbreviation: NA, not applicable.

**Table S2** Systematic Review Search Strategy: Ovid MEDLINE(R) ALL 1946 to June 12, 2020

| Search | Query                                                                                                                                                                                                                                                                                                                                                                            | Items Found |
|--------|----------------------------------------------------------------------------------------------------------------------------------------------------------------------------------------------------------------------------------------------------------------------------------------------------------------------------------------------------------------------------------|-------------|
| #1     | exp Coronavirus/                                                                                                                                                                                                                                                                                                                                                                 | 16,319      |
| #2     | exp Severe Acute Respiratory Syndrome/                                                                                                                                                                                                                                                                                                                                           | 4,626       |
| #3     | exp Betacoronavirus/                                                                                                                                                                                                                                                                                                                                                             | 11,251      |
| #4     | *Coronavirus, Infection/                                                                                                                                                                                                                                                                                                                                                         | 8,957       |
| #5     | ((virus\$ or viral or novel or pandemic or epidemic or outbreak or infect*) adj3 (corona* or coronavir* or Wuhan)).ti,ab,kf.                                                                                                                                                                                                                                                     | 9,981       |
| #6     | (coronavir\$ or nCoV or COVID-19 or COVID* or SARS* or 2019-nCoV or SARS-CoV-2 or SARS-COV).ti,ab,kf.                                                                                                                                                                                                                                                                            | 41,027      |
| #7     | or/1-6                                                                                                                                                                                                                                                                                                                                                                           | 47,411      |
| #8     | (public or general public or general population or patients or citizens or people or person or community or healthy or quarantine or isolation or confinement).ti,ab,kf.                                                                                                                                                                                                         | 7,530,991   |
| #9     | ((health* or medical of hospital or allied) and (worker\$ or professional or personnel or staff)) or staff or physician* or doctor* or nurse* or dentist* or pharmacist* or psychologist* or therapist*).ti,ab,kf.                                                                                                                                                               | 1,103,515   |
| #10    | or/8-9                                                                                                                                                                                                                                                                                                                                                                           | 8,081,316   |
| #11    | 7 and 10                                                                                                                                                                                                                                                                                                                                                                         | 18,195      |
| #12    | exp Mental Health/                                                                                                                                                                                                                                                                                                                                                               | 37,830      |
| #13    | exp Mental Disorder/                                                                                                                                                                                                                                                                                                                                                             | 1,232,078   |
| #14    | (psychosocial or psychosomatic or unintended consequences or common mental disorder or (mental adj1 health) or (mental adj1 disorder\$) or (mental adj1 illness) or (mental adj1 test\$) or (mental adj1 problem\$) or (psycho* adj1 problem\$) or (psycho* adj1 disorder\$) or (psycho* adj1 illness\$) or (psychiat* adj1 disorder\$) or (psychiat* adj1 illness\$)).ti,ab,kf. | 362,041     |
| #15    | exp Depression/                                                                                                                                                                                                                                                                                                                                                                  | 117,944     |
| #16    | *Depression, emotion/                                                                                                                                                                                                                                                                                                                                                            | 71,974      |
| #17    | depress*.mp. or depression/                                                                                                                                                                                                                                                                                                                                                      | 540,869     |
| #18    | (depress* or depressive disorder or (depressi* adj3 disorder\$) or (depressi* adj3 symptom\$) or (depressi* adj3 episode\$)).ti,ab,kf.                                                                                                                                                                                                                                           | 460,761     |
| #19    | exp Anxiety/                                                                                                                                                                                                                                                                                                                                                                     | 84,380      |
| #20    | Anxie*.mp. or anxiety/                                                                                                                                                                                                                                                                                                                                                           | 235,870     |
| #21    | (anxiety\$ or anxious\$).ti,ab,kf.                                                                                                                                                                                                                                                                                                                                               | 197,850     |
| #22    | ((anxi* adj3 disorder\$) or (anxi* adj3 symptom\$) or generalized anxiety disorder or GAD or social anxiety).ti,ab,kf.                                                                                                                                                                                                                                                           | 64,097      |
| #23    | Stress-related disorder/ or posttraumatic stress disorder/                                                                                                                                                                                                                                                                                                                       | 32,300      |

**Table S2** Systematic Review Search Strategy: Ovid MEDLINE(R) ALL 1946 to June 12, 2020  
(Continued)

| Search | Query                                                                                                                                                                                                                                                                         | Items Found |
|--------|-------------------------------------------------------------------------------------------------------------------------------------------------------------------------------------------------------------------------------------------------------------------------------|-------------|
| #24    | (stress or distress or PTSD or PTSS or (posttraumatic adj1 symptom\$) or emotion* trauma or trauma-related disorder\$ or traumatic neurosis or mental distress or emotion* distress or motion* stability or (psycho* adj1 distress*) or (psychiat* adj1 distress*)).ti,ab,kf. | 852,989     |
| #25    | exp Suicide/                                                                                                                                                                                                                                                                  | 62,563      |
| #26    | suicide*.mp                                                                                                                                                                                                                                                                   | 84,768      |
| #27    | (attempted suicide or suicid\$ tendency or suicid\$ ideation or self-harm).ti,ab,kf.                                                                                                                                                                                          | 20,447      |
| #28    | exp Mood Disorder/                                                                                                                                                                                                                                                            | 121,340     |
| #29    | (emotion\$ health or emotion\$ disturbances or affective or fear or panic* or phobia or sadness).ti,ab,kf.                                                                                                                                                                    | 147,655     |
| #30    | exp Insomnia/                                                                                                                                                                                                                                                                 | 13,166      |
| #31    | exp Sleep Disorder/                                                                                                                                                                                                                                                           | 88,889      |
| #32    | Insomnia*.mp                                                                                                                                                                                                                                                                  | 21,406      |
| #33    | (insomnia or sleep disorder\$ or sleep or sleep problem\$ or sleep difficulty or asleep or sleep disturbance or awakening or sleepiness or sleep quality).ti,ab,kf.                                                                                                           | 183,614     |
| #34    | or/12-33                                                                                                                                                                                                                                                                      | 2,736,544   |
| #35    | 11 and 34                                                                                                                                                                                                                                                                     | 2,077       |
| #36    | exp Child/                                                                                                                                                                                                                                                                    | 1,899,657   |
| #37    | exp Infant                                                                                                                                                                                                                                                                    | 1,133,809   |
| #38    | exp Adolescent                                                                                                                                                                                                                                                                | 2,015,972   |
| #39    | (child\$ or infant\$ or newborn\$ or new-born\$ or neonat\$ or neo-nat\$ or baby\$ of babies or pediat\$ or paediat\$ or schoolchild\$ or preschool\$).ti,ab,kf.                                                                                                              | 2,084,607   |
| #40    | (adolescen\$ or juvenile\$ or youth\$ or teenage\$ or youngster\$).ti,ab,kf.                                                                                                                                                                                                  | 430,907     |
| #41    | (young people\$ or young person\$).ti,ab,kf.                                                                                                                                                                                                                                  | 30,823      |
| #42    | or/36-41                                                                                                                                                                                                                                                                      | 4,245,498   |
| #43    | 35 not 42                                                                                                                                                                                                                                                                     | 1,803       |
| #44    | limit 43 to human                                                                                                                                                                                                                                                             | 689         |
| #45    | (news or newspaper article or interview or review or systematic review or case report or case series).pt.                                                                                                                                                                     | 2,935,692   |
| #46    | 44 not 45                                                                                                                                                                                                                                                                     | 546         |
| #47    | limit 47 to yr="2020-Current"                                                                                                                                                                                                                                                 | 251         |

**Table S2** Systematic Review Search Strategy: Embase 1980 to 2020 Week 24 (Continued)

| Search | Query                                                                                                                                                                                                                                                                                                                                                                            | Items Found |
|--------|----------------------------------------------------------------------------------------------------------------------------------------------------------------------------------------------------------------------------------------------------------------------------------------------------------------------------------------------------------------------------------|-------------|
| #1     | exp Coronavirus/                                                                                                                                                                                                                                                                                                                                                                 | 14,379      |
| #2     | exp Severe Acute Respiratory Syndrome/                                                                                                                                                                                                                                                                                                                                           | 8,746       |
| #3     | exp Betacoronavirus/                                                                                                                                                                                                                                                                                                                                                             | 9,389       |
| #4     | *Coronavirus, Infection/                                                                                                                                                                                                                                                                                                                                                         | 2,265       |
| #5     | ((virus\$ or viral or novel or pandemic or epidemic or outbreak or infect*) adj3 (corona* or coronavir* or Wuhan)).ti,ab,kw.                                                                                                                                                                                                                                                     | 10,281      |
| #6     | (coronavir\$ or nCoV or COVID-19 or COVID* or SARS* or 2019-nCoV or SARS-CoV-2 or SARS-COV).ti,ab,kw.                                                                                                                                                                                                                                                                            | 40,649      |
| #7     | or/1-6                                                                                                                                                                                                                                                                                                                                                                           | 49,287      |
| #8     | (public or general public or general population or patients or citizens or people or person or community or healthy or quarantine or isolation or confinement).ti,ab,kw.                                                                                                                                                                                                         | 10,234,811  |
| #9     | ((health* or medical of hospital or allied) and (worker\$ or professional or personnel or staff)) or staff or physician* or doctor* or nurse* or dentist* or pharmacist* or psychologist* or therapist*).ti,ab,kw.                                                                                                                                                               | 1,381,815   |
| #10    | or/8-9                                                                                                                                                                                                                                                                                                                                                                           | 10,813,960  |
| #11    | 7 and 10                                                                                                                                                                                                                                                                                                                                                                         | 19,629      |
| #12    | exp Mental Health/                                                                                                                                                                                                                                                                                                                                                               | 151,624     |
| #13    | exp Mental Disorder/                                                                                                                                                                                                                                                                                                                                                             | 2,082,833   |
| #14    | (psychosocial or psychosomatic or unintended consequences or common mental disorder or (mental adj1 health) or (mental adj1 disorder\$) or (mental adj1 illness) or (mental adj1 test\$) or (mental adj1 problem\$) or (psycho* adj1 problem\$) or (psycho* adj1 disorder\$) or (psycho* adj1 illness\$) or (psychiat* adj1 disorder\$) or (psychiat* adj1 illness\$)).ti,ab,kw. | 450,574     |
| #15    | exp Depression/                                                                                                                                                                                                                                                                                                                                                                  | 459,794     |
| #16    | depress*.mp. or depression/                                                                                                                                                                                                                                                                                                                                                      | 749,058     |
| #17    | (depress* or depressive disorder or (depressi* adj3 disorder\$) or (depressi* adj3 symptom\$) or (depressi* adj3 episode\$)).ti,ab,kw.                                                                                                                                                                                                                                           | 591,715     |
| #18    | exp Anxiety/                                                                                                                                                                                                                                                                                                                                                                     | 200,531     |
| #19    | Anxie*.mp. or anxiety/                                                                                                                                                                                                                                                                                                                                                           | 354,606     |
| #20    | (anxiety\$ or anxious\$).ti,ab,kw.                                                                                                                                                                                                                                                                                                                                               | 279,612     |
| #21    | ((anxi* adj3 disorder\$) or (anxi* adj3 symptom\$) or generalized anxiety disorder or GAD or social anxiety).ti,ab,kw.                                                                                                                                                                                                                                                           | 91,424      |
| #22    | Stress-related disorder/ or posttraumatic stress disorder/                                                                                                                                                                                                                                                                                                                       | 59,424      |
| #23    | (stress or distress or PTSD or PTSS or (posttraumatic adj1 symptom\$) or emotion* trauma or trauma-related disorder\$ or traumatic neurosis or mental distress or emotion* distress or motion* stability or (psycho* adj1 distress*) or (psychiat* adj1 distress*)).ti,ab,kw.                                                                                                    | 1,091,197   |
| #24    | exp Suicide/                                                                                                                                                                                                                                                                                                                                                                     | 51,504      |
| #25    | suicide*.mp                                                                                                                                                                                                                                                                                                                                                                      | 103,249     |

**Table S2** Systematic Review Search Strategy: Embase 1980 to 2020 Week 24 (Continued)

| Search | Query                                                                                                                                                               | Items Found |
|--------|---------------------------------------------------------------------------------------------------------------------------------------------------------------------|-------------|
| #26    | (attempted suicide or suicid\$ tendency or suicid\$ ideation or self-harm).ti,ab,kw.                                                                                | 25,973      |
| #27    | exp Mood Disorder/                                                                                                                                                  | 501,309     |
| #28    | (emotion\$ health or emotion\$ disturbances or affective or fear or panic* or phobia or sadness).ti,ab,kw.                                                          | 191,182     |
| #29    | exp Insomnia/                                                                                                                                                       | 65,712      |
| #30    | exp Sleep Disorder/                                                                                                                                                 | 230,692     |
| #31    | Insomnia*.mp                                                                                                                                                        | 72,271      |
| #32    | (insomnia or sleep disorder\$ or sleep or sleep problem\$ or sleep difficulty or asleep or sleep disturbance or awakening or sleepiness or sleep quality).ti,ab,kw. | 272,238     |
| #33    | or/12-32                                                                                                                                                            | 3,736,724   |
| #34    | 11 and 33                                                                                                                                                           | 2,438       |
| #35    | exp Child/                                                                                                                                                          | 2,432,014   |
| #36    | exp Infant                                                                                                                                                          | 916,631     |
| #37    | exp Adolescent                                                                                                                                                      | 1,456,272   |
| #38    | (child\$ or infant\$ or newborn\$ or new-born\$ or neonat\$ or neo-nat\$ or baby\$ of babies or pediat\$ or paediat\$ or schoolchild\$ or preschool\$).ti,ab,kw.    | 2,401,439   |
| #39    | (adolescen\$ or juvenile\$ or youth\$ or teenage\$ or youngster\$).ti,ab,kw.                                                                                        | 514,766     |
| #40    | (young people\$ or young person\$).ti,ab,kw.                                                                                                                        | 41,533      |
| #41    | or/35-40                                                                                                                                                            | 3,952,084   |
| #42    | 34 not 41                                                                                                                                                           | 2,136       |
| #43    | limit 42 to human                                                                                                                                                   | 2,020       |
| #44    | (news or newspaper article or interview or review or systematic review or case report or case series).pt.                                                           | 2,539,938   |
| #45    | 43 not 44                                                                                                                                                           | 1,680       |
| #46    | limit 45 to yr="2020-Current"                                                                                                                                       | 1,039       |



**Table S2** Systematic Review Search Strategy: PsycINFO 1806 to June Week 2, 2020 (Continued)

| Search | Query                                                                                                                                                                                                                                                                                                                                                                         | Items Found |
|--------|-------------------------------------------------------------------------------------------------------------------------------------------------------------------------------------------------------------------------------------------------------------------------------------------------------------------------------------------------------------------------------|-------------|
| #1     | (coronavirus or severe acute respiratory syndrome or betacoronavirus).ti,ab.                                                                                                                                                                                                                                                                                                  | 413         |
| #2     | ((virus\$ or viral or novel or pandemic or epidemic or outbreak or infect*) adj3 (corona* or coronavir* or Wuhan)).ti,ab.                                                                                                                                                                                                                                                     | 115         |
| #3     | (coronavir\$ or nCoV or COVID-19 or COVID* or SARS* or 2019-nCoV or SARS-CoV-2 or SARS-COV).ti,ab.                                                                                                                                                                                                                                                                            | 867         |
| #4     | or/1-3                                                                                                                                                                                                                                                                                                                                                                        | 907         |
| #5     | (public or general public or general population or patients or citizens or people or person or community or healthy or quarantine or isolation or confinement).ti,ab.                                                                                                                                                                                                         | 1,387,868   |
| #6     | ((health* or medical of hospital or allied) and (worker\$ or professional or personnel or staff)) or staff or physician* or doctor* or nurse* or dentist* or pharmacist* or psychologist* or therapist*).ti,ab.                                                                                                                                                               | 415,996     |
| #7     | or/5-6                                                                                                                                                                                                                                                                                                                                                                        | 1,615,246   |
| #8     | 4 and 7                                                                                                                                                                                                                                                                                                                                                                       | 579         |
| #9     | exp Mental Health/                                                                                                                                                                                                                                                                                                                                                            | 65,851      |
| #10    | (psychosocial or psychosomatic or unintended consequences or common mental disorder or (mental adj1 health) or (mental adj1 disorder\$) or (mental adj1 illness) or (mental adj1 test\$) or (mental adj1 problem\$) or (psycho* adj1 problem\$) or (psycho* adj1 disorder\$) or (psycho* adj1 illness\$) or (psychiat* adj1 disorder\$) or (psychiat* adj1 illness\$)).ti,ab. | 371,022     |
| #11    | exp Depression/                                                                                                                                                                                                                                                                                                                                                               | 25,526      |
| #12    | *Depression, emotion/                                                                                                                                                                                                                                                                                                                                                         | 19,742      |
| #13    | depress*.mp. or depression/                                                                                                                                                                                                                                                                                                                                                   | 367,022     |
| #14    | (depress* or depressive disorder or (depressi* adj3 disorder\$) or (depressi* adj3 symptom\$) or (depressi* adj3 episode\$)).ti,ab.                                                                                                                                                                                                                                           | 299,591     |
| #15    | exp Anxiety/                                                                                                                                                                                                                                                                                                                                                                  | 71,200      |
| #16    | Anxie*.mp. or anxiety/                                                                                                                                                                                                                                                                                                                                                        | 240,532     |
| #17    | (anxiety\$ or anxious\$).ti,ab.                                                                                                                                                                                                                                                                                                                                               | 198,434     |
| #18    | ((anxi* adj3 disorder\$) or (anxi* adj3 symptom\$) or generalized anxiety disorder or GAD or social anxiety).ti,ab.                                                                                                                                                                                                                                                           | 62,298      |
| #19    | Stress-related disorder/ or posttraumatic stress disorder/                                                                                                                                                                                                                                                                                                                    | 32,729      |
| #20    | (stress or distress or PTSD or PTSS or (posttraumatic adj1 symptom\$) or emotion* trauma or trauma-related disorder\$ or traumatic neurosis or mental distress or emotion* distress or motion* stability or (psycho* adj1 distress*) or (psychiat* adj1 distress*)).ti,ab.                                                                                                    | 260,956     |
| #21    | exp Suicide/                                                                                                                                                                                                                                                                                                                                                                  | 34,457      |
| #22    | suicide*.mp                                                                                                                                                                                                                                                                                                                                                                   | 59,094      |
| #23    | (attempted suicide or suicid\$ tendency or suicid\$ ideation or self-harm).ti,ab.                                                                                                                                                                                                                                                                                             | 19,389      |
| #24    | exp Mood Disorder/                                                                                                                                                                                                                                                                                                                                                            | 142,851     |
| #25    | (emotion\$ health or emotion\$ disturbances or affective or fear or panic* or phobia or sadness).ti,ab.                                                                                                                                                                                                                                                                       | 177,078     |

**Table S2** Systematic Review Search Strategy: PsycINFO 1806 to June Week 2, 2020 (Continued)

| <b>Search</b> | <b>Query</b>                                                                                                                                                     | <b>Items Found</b> |
|---------------|------------------------------------------------------------------------------------------------------------------------------------------------------------------|--------------------|
| #26           | exp Insomnia/                                                                                                                                                    | 6,280              |
| #27           | exp Sleep Disorder/                                                                                                                                              | 19,256             |
| #28           | Insomnia*.mp                                                                                                                                                     | 13,252             |
| #29           | (insomnia or sleep disorder\$ or sleep or sleep problem\$ or sleep difficulty or asleep or sleep disturbance or awakening or sleepiness or sleep quality).ti,ab. | 75,446             |
| #30           | or/9-29                                                                                                                                                          | 1,095,428          |
| #31           | 8 and 30                                                                                                                                                         | 286                |
| #32           | (child\$ or infant\$ or newborn\$ or new-born\$ or neonat\$ or neo-nat\$ or baby\$ of babies or pediat\$ or paediat\$ or schoolchild\$ or preschool\$).ti,ab.    | 759,422            |
| #33           | (adolescen\$ or juvenile\$ or youth\$ or teenage\$ or youngster\$).ti,ab.                                                                                        | 316,704            |
| #34           | (young people\$ or young person\$).ti,ab.                                                                                                                        | 31,373             |
| #35           | or/32-34                                                                                                                                                         | 959,221            |
| #36           | 31 not 35                                                                                                                                                        | 259                |
| #37           | limit 36 to human                                                                                                                                                | 205                |
| #38           | limit 37 to yr="2020-Current"                                                                                                                                    | 61                 |

**Table S2** Systematic Review Search Strategy: PubMed, From Inception to June 16, 2020 (Continued)

| Search | Query                                                                                                                                                                                                                                                                                               | Items Found |
|--------|-----------------------------------------------------------------------------------------------------------------------------------------------------------------------------------------------------------------------------------------------------------------------------------------------------|-------------|
| #1     | ((((((((((Coronavirus) OR Betacoronavirus) OR Coronavirus disease 2019) OR COVID-19) OR COVID) OR Novel coronavirus) OR 2019-nCoV) OR nCoV) OR Severe Acute Respiratory Syndrome) OR SARS) OR SARS-CoV-2) OR SARS-COV) OR Wuhan pneumonia                                                           | 52,054      |
| #2     | ((((((((((Public) OR General public) OR General population) OR Patients) OR Citizens) OR People) OR Person) OR Community) OR Healthy) OR Quarantine) OR Isolation) OR Confinement                                                                                                                   | 15,530,812  |
| #3     | ((((((((((((Healthcare workers) OR Healthcare professional) OR Healthcare personnel) OR Health professional) OR Health workers) OR Medical workers) OR Practitioner) OR Medical staff) OR Allied staff) OR Physician) OR Doctor) OR Nurse) OR Dentist) OR Pharmacist) OR Psychologist) OR Therapist | 3,305,624   |
| #4     | #2 OR #3                                                                                                                                                                                                                                                                                            | 16,172,297  |
| #5     | #1 AND #4                                                                                                                                                                                                                                                                                           | 32,615      |
| #6     | ((((((((Mental) OR Mental Health) OR Mental Disorder) OR Mental illness) OR Mental problems) OR Psychosocial) OR Psychosomatic) OR Unintended consequences) OR Common mental disorder                                                                                                               | 1,635,801   |
| #7     | (((Depression) OR Depressive) OR Depress) OR Depressive disorder) OR Depressive symptoms                                                                                                                                                                                                            | 518,102     |
| #8     | (((Anxiety) OR Anxious) OR Generalized anxiety disorder) OR GAD) OR Social anxiety                                                                                                                                                                                                                  | 256,813     |
| #9     | ((((((((Stress) OR Distress) OR Mental distress) OR Emotion distress) OR Stress-related disorder) OR Trauma-related disorder) OR Traumatic neurosis) OR Posttraumatic stress disorder) OR Posttraumatic symptom) OR PTSD) OR PTSS) OR Emotion trauma                                                | 1,127,643   |
| #10    | (((Suicide) OR Attempted suicide) OR Suicide tendency) OR Suicide ideation) OR Self-harm                                                                                                                                                                                                            | 108,390     |
| #11    | ((((Mood disorder) OR Emotion disturbances) OR Affective) OR Fear) OR Panic) OR Phobia) OR Sadness                                                                                                                                                                                                  | 314,026     |
| #12    | ((((((((Insomnia) OR Sleep) OR Sleep disorder) OR Sleep disturbance) OR Sleep problem) OR Sleep difficulty) OR Sleepiness) OR Sleep quality) OR Asleep) OR Awakening                                                                                                                                | 241,669     |
| #13    | #6 OR #7 OR #8 OR #9 OR #10 OR #11 OR #12                                                                                                                                                                                                                                                           | 3,147,467   |
| #14    | #5 AND #13                                                                                                                                                                                                                                                                                          | 7,529       |
| #15    | ((((((((Case Reports[Publication Type]) OR Guideline[Publication Type]) OR News[Publication Type]) OR Newspaper Article[Publication Type]) OR Review[Publication Type])                                                                                                                             | 4,877,143   |
| #16    | #14 NOT #15                                                                                                                                                                                                                                                                                         | 5,092       |
| #17    | Filters: Humans                                                                                                                                                                                                                                                                                     | 2,979       |
| #18    | Filters: Publication date from Jan 01, 2020 to current                                                                                                                                                                                                                                              | 503         |

**Table S2** Systematic Review Search Strategy: The Cochrane Library, From Inception to June 16, 2020 (Continued)

| Search | Query                                                                                                                                                                                                                                                                                                 | Items Found |
|--------|-------------------------------------------------------------------------------------------------------------------------------------------------------------------------------------------------------------------------------------------------------------------------------------------------------|-------------|
| #1     | ((((((((((((Coronavirus) OR Betacoronavirus) OR "Coronavirus disease 2019") OR COVID19) OR COVID) OR "Novel coronavirus") OR 2019nCoV) OR nCoV) OR "Severe Acute Respiratory Syndrome") OR SARS) OR SARS CoV2) OR SARS COV) OR "Wuhan pneumonia"                                                      | 849         |
| #2     | ((((((((((((Public) OR General public) OR General population) OR Patients) OR Citizens) OR People) OR Person) OR Community) OR Healthy) OR Quarantine) OR Isolation) OR Confinement                                                                                                                   | 1,065,487   |
| #3     | ((((((((((((((Healthcare workers) OR Healthcare professional) OR Healthcare personnel) OR Health professional) OR Health workers) OR Medical workers) OR Practitioner) OR Medical staff) OR Allied staff) OR Physician) OR Doctor) OR Nurse) OR Dentist) OR Pharmacist) OR Psychologist) OR Therapist | 92,172      |
| #4     | #2 OR #3                                                                                                                                                                                                                                                                                              | 1,084,652   |
| #5     | #1 AND #4                                                                                                                                                                                                                                                                                             | 742         |
| #6     | ((((((((((Mental) OR Mental Health) OR Mental Disorder) OR Mental illness) OR Mental problems) OR Psychosocial) OR Psychosomatic) OR Unintended consequences) OR Common mental disorder                                                                                                               | 75,740      |
| #7     | ((((Depression) OR Depressive) OR Depress) OR Depressive disorder) OR Depressive symptoms                                                                                                                                                                                                             | 80,359      |
| #8     | ((((Anxiety) OR Anxious) OR Generalized anxiety disorder) OR GAD) OR Social anxiety                                                                                                                                                                                                                   | 52,391      |
| #9     | ((((((((((Stress) OR Distress) OR Mental distress) OR Emotion distress) OR Stress related disorder) OR Trauma related disorder) OR Traumatic neurosis) OR Posttraumatic stress disorder) OR Posttraumatic symptom) OR PTSD) OR PTSS) OR Emotion trauma                                                | 74,817      |
| #10    | ((((Suicide) OR Attempted suicide) OR Suicide tendency) OR Suicide ideation) OR Self harm                                                                                                                                                                                                             | 6,377       |
| #11    | ((((((Mood disorder) OR Emotion disturbances) OR Affective) OR Fear) OR Panic) OR Phobia) OR Sadness                                                                                                                                                                                                  | 26,633      |
| #12    | ((((((((((Insomnia) OR Sleep) OR Sleep disorder) OR Sleep disturbance) OR Sleep problem) OR Sleep difficulty) OR Sleepiness) OR Sleep quality) OR Asleep) OR Awakening                                                                                                                                | 45,538      |
| #13    | #6 OR #7 OR #8 OR #9 OR #10 OR #11 OR #12                                                                                                                                                                                                                                                             | 241,994     |
| #14    | #5 AND #13                                                                                                                                                                                                                                                                                            | 197         |
| #15    | Filters: Library publication date from Jan 2020 to Current                                                                                                                                                                                                                                            | 148         |

**Table S2** Systematic Review Search Strategy: Web of Science, From Inception to June 16, 2020  
(Continued)

| Search | Query                                                                                                                                                                                                                                                                                                             | Items Found |
|--------|-------------------------------------------------------------------------------------------------------------------------------------------------------------------------------------------------------------------------------------------------------------------------------------------------------------------|-------------|
| #1     | TS=(Coronavirus OR Betacoronavirus OR "Coronavirus disease 2019" OR COVID-19 OR COVID OR "Novel coronavirus" OR 2019-nCoV OR nCoV OR "Severe Acute Respiratory Syndrome" OR SARS OR SARS-CoV-2 OR SARS-COV OR "Wuhan pneumonia")                                                                                  | 27,240      |
| #2     | TS=(Public OR "General public" OR "General population" OR Patients OR Citizens OR People OR Person OR Community OR Healthy OR Quarantine OR Isolation OR Confinement)                                                                                                                                             | 7,357,292   |
| #3     | TS=( "Healthcare workers" OR "Healthcare professional" OR "Healthcare personnel" OR "Health professional" OR "Health workers" OR "Medical workers" OR Practitioner OR "Medical staff" OR "Allied staff" OR "Allied health" OR Physician OR Doctor OR Nurse OR Dentist OR Pharmacist OR Psychologist OR Therapist) | 735,730     |
| #4     | #3 OR #2                                                                                                                                                                                                                                                                                                          | 7,644,297   |
| #5     | #4 AND #1                                                                                                                                                                                                                                                                                                         | 9,994       |
| #6     | TS=(Mental OR "Mental Health" OR "Mental Disorder" OR "Mental illness" OR "Mental problems" OR Psychosocial OR Psychosomatic OR "Unintended consequences" OR "Common mental disorder")                                                                                                                            | 452,802     |
| #7     | TS=(Depression OR Depressive OR Depress OR "Depressive disorder" OR "Depressive symptoms")                                                                                                                                                                                                                        | 469,701     |
| #8     | TS=(Anxiety OR Anxious OR "Generalized anxiety disorder" OR GAD OR Social anxiety)                                                                                                                                                                                                                                | 237,985     |
| #9     | TS=(Stress OR Distress OR "Mental distress" OR "Emotion distress" OR "Stress-related disorder" OR "Trauma-related disorder" OR "Traumatic neurosis" OR "Posttraumatic stress disorder" OR "Posttraumatic symptom" OR PTSS OR PTSD OR Emotion trauma)                                                              | 1,581,251   |
| #10    | TS=(Suicide OR "Attempted suicide" OR "Suicide tendency" OR "Suicide ideation" OR Self-harm)                                                                                                                                                                                                                      | 62,347      |
| #11    | TS=( "Mood disorder" OR "Emotion disturbances" OR Affective OR Fear OR Panic OR Phobia OR Sadness)                                                                                                                                                                                                                | 197,554     |
| #12    | TS=(Insomnia OR Sleep OR "Sleep disorder" OR "Sleep disturbance" OR "Sleep problem" OR "Sleep difficulty" OR Sleepiness OR "Sleep quality" OR Asleep OR Awakening)                                                                                                                                                | 205,077     |
| #13    | #12 OR #11 OR #10 OR #9 OR #8 OR #7 OR #6                                                                                                                                                                                                                                                                         | 2,613,527   |
| #14    | #13 AND #5                                                                                                                                                                                                                                                                                                        | 1,199       |
| #15    | ((#13 AND #5) ) AND DOCUMENT TYPES: (Article)                                                                                                                                                                                                                                                                     | 885         |
| #16    | Filters: Timespan=2020                                                                                                                                                                                                                                                                                            | 376         |

**Table S2** Systematic Review Search Strategy: Scopus, From Inception to June 16, 2020 (Continued)

| Search | Query                                                                                                                                                                                                                                                                                                                                                                                                                                                                                                                                                                                                                                               | Items Found |
|--------|-----------------------------------------------------------------------------------------------------------------------------------------------------------------------------------------------------------------------------------------------------------------------------------------------------------------------------------------------------------------------------------------------------------------------------------------------------------------------------------------------------------------------------------------------------------------------------------------------------------------------------------------------------|-------------|
| #1     | ( TITLE-ABS-KEY ( coronavirus ) OR TITLE-ABS-KEY ( betacoronavirus ) OR TITLE-ABS-KEY ( coronavirus AND disease 2019 ) OR TITLE-ABS-KEY ( covid-19 ) OR TITLE-ABS-KEY ( covid ) OR TITLE-ABS-KEY ( novel AND coronavirus ) OR TITLE-ABS-KEY ( 2019-ncov ) OR TITLE-ABS-KEY ( ncov ) OR TITLE-ABS-KEY ( severe AND acute AND respiratory AND syndrome ) OR TITLE-ABS-KEY ( sars ) OR TITLE-ABS-KEY ( sars-cov-2 ) OR TITLE-ABS-KEY ( sars-cov ) OR TITLE-ABS-KEY ( wuhan AND pneumonia ) )                                                                                                                                                           | 146,208     |
| #2     | ( TITLE-ABS-KEY ( public ) OR TITLE-ABS-KEY ( general AND public ) OR TITLE-ABS-KEY ( general AND population ) OR TITLE-ABS-KEY ( patients ) OR TITLE-ABS-KEY ( citizens ) OR TITLE-ABS-KEY ( people ) OR TITLE-ABS-KEY ( person ) OR TITLE-ABS-KEY ( community ) OR TITLE-ABS-KEY ( healthy ) OR TITLE-ABS-KEY ( quarantine ) OR TITLE-ABS-KEY ( isolation ) OR TITLE-ABS-KEY ( confinement ) )                                                                                                                                                                                                                                                    | 14,236,887  |
| #3     | ( TITLE-ABS-KEY ( healthcare AND workers ) OR TITLE-ABS-KEY ( healthcare AND professional ) OR TITLE-ABS-KEY ( healthcare AND personnel ) OR TITLE-ABS-KEY ( health AND professional ) OR TITLE-ABS-KEY ( health AND workers ) OR TITLE-ABS-KEY ( medical AND workers ) OR TITLE-ABS-KEY ( practitioner ) OR TITLE-ABS-KEY ( medical AND staff ) OR TITLE-ABS-KEY ( allied AND staff ) OR TITLE-ABS-KEY ( allied AND health ) OR TITLE-ABS-KEY ( physician ) OR TITLE-ABS-KEY ( doctor ) OR TITLE-ABS-KEY ( nurse ) OR TITLE-ABS-KEY ( dentist ) OR TITLE-ABS-KEY ( pharmacist ) OR TITLE-ABS-KEY ( psychologist ) OR TITLE-ABS-KEY ( therapist ) ) | 2,180,891   |
| #4     | #3 OR #2                                                                                                                                                                                                                                                                                                                                                                                                                                                                                                                                                                                                                                            | 15,099,757  |
| #5     | #4 AND #1                                                                                                                                                                                                                                                                                                                                                                                                                                                                                                                                                                                                                                           | 37,087      |
| #6     | ( TITLE-ABS-KEY ( mental ) OR TITLE-ABS-KEY ( mental AND health ) OR TITLE-ABS-KEY ( mental AND disorder ) OR TITLE-ABS-KEY ( mental AND illness ) OR TITLE-ABS-KEY ( mental AND problems ) OR TITLE-ABS-KEY ( psychosocial ) OR TITLE-ABS-KEY ( psychosomatic ) OR TITLE-ABS-KEY ( unintended AND consequences ) OR TITLE-ABS-KEY ( common AND mental AND disorder ) )                                                                                                                                                                                                                                                                             | 1,166,788   |
| #7     | ( TITLE-ABS-KEY ( depression ) OR TITLE-ABS-KEY ( depressive ) OR TITLE-ABS-KEY ( depress ) OR TITLE-ABS-KEY ( depressive AND disorder ) OR TITLE-ABS-KEY ( depressive AND symptoms ) )                                                                                                                                                                                                                                                                                                                                                                                                                                                             | 753,625     |
| #8     | ( TITLE-ABS-KEY ( anxiety ) OR TITLE-ABS-KEY ( anxious ) OR TITLE-ABS-KEY ( generalized AND anxiety AND disorder ) OR TITLE-ABS-KEY ( gad ) OR TITLE-ABS-KEY ( social AND anxiety ) )                                                                                                                                                                                                                                                                                                                                                                                                                                                               | 400,753     |
| #9     | ( TITLE-ABS-KEY ( stress ) OR TITLE-ABS-KEY ( distress ) OR TITLE-ABS-KEY ( mental AND distress ) OR TITLE-ABS-KEY ( emotion AND distress ) OR TITLE-ABS-KEY ( stress-related AND disorder ) OR TITLE-ABS-KEY ( trauma-related AND disorder ) OR TITLE-ABS-KEY ( traumatic AND neurosis ) OR TITLE-ABS-KEY ( posttraumatic AND stress AND disorder ) OR TITLE-ABS-KEY ( posttraumatic AND symptom ) OR TITLE-ABS-KEY ( ptsd ) OR TITLE-ABS-KEY ( ptsd ) OR TITLE-ABS-KEY ( emotion AND trauma ) )                                                                                                                                                   | 2,680,174   |
| #10    | ( TITLE-ABS-KEY ( suicide ) OR TITLE-ABS-KEY ( attempted AND suicide ) OR TITLE-ABS-KEY ( suicide AND tendency ) OR TITLE-ABS-KEY ( suicide AND ideation ) OR TITLE-ABS-KEY ( self-harm ) )                                                                                                                                                                                                                                                                                                                                                                                                                                                         | 128,891     |

**Table S2** Systematic Review Search Strategy: Scopus, From Inception to June 16, 2020 (Continued)

| Search | Query                                                                                                                                                                                                                                                                                                                                                           | Items Found |
|--------|-----------------------------------------------------------------------------------------------------------------------------------------------------------------------------------------------------------------------------------------------------------------------------------------------------------------------------------------------------------------|-------------|
| #11    | ( TITLE-ABS-KEY ( mood AND disorder ) OR TITLE-ABS-KEY ( emotion AND disturbances ) OR TITLE-ABS-KEY ( affective ) OR TITLE-ABS-KEY ( fear ) OR TITLE-ABS-KEY ( panic ) OR TITLE-ABS-KEY ( phobia ) OR TITLE-ABS-KEY ( sadness ) )                                                                                                                              | 406,323     |
| #12    | ( TITLE-ABS-KEY ( insomnia ) OR TITLE-ABS-KEY ( sleep ) OR TITLE-ABS-KEY ( sleep AND disorder ) OR TITLE-ABS-KEY ( sleep AND disturbance ) OR TITLE-ABS-KEY ( sleep AND problem ) OR TITLE-ABS-KEY ( sleep AND difficulty ) OR TITLE-ABS-KEY ( sleepiness ) OR TITLE-ABS-KEY ( sleep AND quality ) OR TITLE-ABS-KEY ( asleep ) OR TITLE-ABS-KEY ( awakening ) ) | 335,899     |
| #13    | #6 OR #7 OR #8 OR #9 OR #10 OR #11 OR #12                                                                                                                                                                                                                                                                                                                       | 4,798,699   |
| #14    | #5 AND #13                                                                                                                                                                                                                                                                                                                                                      | 9,110       |
| #15    | Filters: ( LIMIT-TO ( PUBYEAR , 2020 ) ) AND ( LIMIT-TO ( DOCTYPE , "ar" ) OR LIMIT-TO ( DOCTYPE , "le" ) OR LIMIT-TO ( DOCTYPE , "ed" ) )                                                                                                                                                                                                                      | 1,654       |

**Table S2** Systematic Review Search Strategy: CINAHL, From Inception to June 16, 2020 (Continued)

| Search | Query                                                                                                                                                                                                                                                                                        | Items Found |
|--------|----------------------------------------------------------------------------------------------------------------------------------------------------------------------------------------------------------------------------------------------------------------------------------------------|-------------|
| #1     | AB Coronavirus OR Betacoronavirus OR Coronavirus disease 2019 OR COVID-19 OR COVID OR Novel coronavirus OR 2019-nCoV OR nCoV OR Severe Acute Respiratory Syndrome OR SARS OR SARS-CoV-2 OR SARS-COV OR Wuhan pneumonia                                                                       | 11,838      |
| #2     | AB Public OR General public OR General population OR Patients OR Citizens OR People OR Person OR Community OR Healthy OR Quarantine OR Isolation OR Confinement                                                                                                                              | 2,862,464   |
| #3     | AB Healthcare workers OR Healthcare professional OR Healthcare personnel OR Health professional OR Health workers OR Medical workers OR Practitioner OR Medical staff OR Allied staff OR Allied health OR Physician OR Doctor OR Nurse OR Dentist OR Pharmacist OR Psychologist OR Therapist | 1,197,249   |
| #4     | S2 OR S3                                                                                                                                                                                                                                                                                     | 3,466,109   |
| #5     | S1 AND S4                                                                                                                                                                                                                                                                                    | 7,234       |
| #6     | AB Mental OR Mental Health OR Mental Disorder OR Mental illness OR Mental problems OR Psychosocial OR Psychosomatic OR Unintended consequences OR Common mental disorder                                                                                                                     | 742,462     |
| #7     | AB Depression OR Depressive OR Depress OR Depressive disorder OR Depressive symptoms                                                                                                                                                                                                         | 154,396     |
| #8     | AB Anxiety OR Anxious OR Generalized anxiety disorder OR GAD OR Social anxiety                                                                                                                                                                                                               | 83,904      |
| #9     | AB Stress OR Distress OR Mental distress OR Emotion distress OR Stress-related disorder OR Trauma-related disorder OR Traumatic neurosis OR Posttraumatic stress disorder OR Posttraumatic symptom OR PTSS OR PTSD OR Emotion trauma                                                         | 192,581     |
| #10    | AB Suicide OR Attempted suicide OR Suicide tendency OR Suicide ideation OR Self-harm                                                                                                                                                                                                         | 34,230      |
| #11    | AB Mood disorder OR Emotion disturbances OR Affective OR Fear OR Panic OR Phobia OR Sadness                                                                                                                                                                                                  | 83,033      |
| #12    | AB Insomnia OR Sleep OR Sleep disorder OR Sleep disturbance OR Sleep problem OR Sleep difficulty OR Sleepiness OR Sleep quality OR Asleep OR Awakening                                                                                                                                       | 79,760      |
| #13    | S6 OR S7 OR S8 OR S9 OR S10 OR S11 OR S12                                                                                                                                                                                                                                                    | 1,047,001   |
| #14    | S5 AND S13                                                                                                                                                                                                                                                                                   | 2,610       |
| #15    | Limiters - Published Date: 20200101-20201231<br>Expanders - Apply equivalent subjects<br>Source Types - Academic Journals                                                                                                                                                                    | 471         |



**Table S3** Included Studies in the Systematic Review and Meta-Analysis

| Author, Country               | Title                                                                                                                                                                                                                |
|-------------------------------|----------------------------------------------------------------------------------------------------------------------------------------------------------------------------------------------------------------------|
| <b>Africa Region</b>          |                                                                                                                                                                                                                      |
| Olaseni et al, Nigeria        | Psychological distress experiences of Nigerians amid COVID-19 pandemic. PsyArXiv May 6 doi:1031234/osfio/9v78y 2020.                                                                                                 |
| Kim et al, South Africa       | Evaluating the mental health impacts of the COVID-19 pandemic in urban South Africa: Perceived risk of COVID-19 infection and childhood trauma predict adult depressive symptoms. medRxiv 2020: 2020.06.13.20130120. |
| <b>Region of the Americas</b> |                                                                                                                                                                                                                      |
| Filgueiras, Brazil            | Factors linked to changes in mental health outcomes among Brazilians in quarantine due to COVID-19. medRxiv 2020: 2020.05.12.20099374.                                                                               |
| Hubner, Brazil                | Distress among Brazilian university students due to the Covid-19 pandemic: Survey results and reflections. medRxiv 2020: 2020.06.19.20135251.                                                                        |
| Sartorao et al, Brazil        | Impact of COVID-19 pandemic on mental health of medical students: a cross-sectional study using GAD-7 and PHQ-9 questionnaires. medRxiv 2020: 2020.06.24.20138925.                                                   |
| Zhang et al, Brazil           | Mental distress of adults in Brazil during the COVID-19 crisis. medRxiv 2020: 2020.04.18.20070896.                                                                                                                   |
| Garcia-Priego et al, Mexico   | Anxiety, depression, attitudes, and internet addiction during the initial phase of the 2019 coronavirus disease (COVID-19) epidemic: A cross-sectional study in Mexico. medRxiv 2020: 2020.05.10.20095844.           |
| Bryan et al, U.S.             | Associations among state-level physical distancing measures and suicidal thoughts and behaviors among U.S. adults during the early COVID-19 pandemic. PsyArXiv May 29 doi:1031234/osfio/9bpr4 2020.                  |
| Kantor et al, U.S.            | Mental health outcomes and associations during the coronavirus disease 2019 pandemic: A cross-sectional survey of the US general population. medRxiv 2020: 2020.05.26.20114140.                                      |
| Killgore et al, U.S.          | Loneliness: A signature mental health concern in the era of COVID-19. Psychiatry Res 2020; 290: 113117.                                                                                                              |
| Lan et al, U.S.               | Association between SARS-CoV-2 infection, exposure risk and mental health among a cohort of essential retail workers in the United States. medRxiv 2020: 2020.06.08.20125120.                                        |
| Lee et al, U.S.               | Mental health characteristics associated with dysfunctional coronavirus anxiety. Psychol Med 2020: 1-2.                                                                                                              |
| Liu et al, U.S.               | Factors associated with depression, anxiety, and PTSD symptomatology during the COVID-19 pandemic: Clinical implications for U.S. young adult mental health. Psychiatry Res 2020; 290: 113172.                       |
| Rosenberg et al, U.S.         | Depression and loneliness during COVID-19 restrictions in the United States, and their associations with frequency of social and sexual connections. medRxiv 2020: 2020.05.18.20101840.                              |
| <b>South-East Asia Region</b> |                                                                                                                                                                                                                      |
| Banna et al, Bangladesh       | The impact of the COVID-19 pandemic on the mental health of the adult population in Bangladesh: A nationwide cross-sectional study. PsyArXiv May 24 doi:1031234/osfio/chw5d 2020.                                    |
| Islam et al, Bangladesh       | Psychological responses during the COVID-19 outbreak among university students in Bangladesh. PsyArXiv June 2 doi:1031234/osfio/cndz7 2020.                                                                          |
| Khan et al, Bangladesh        | The impact of COVID-19 pandemic on mental health & wellbeing among home-quarantined Bangladeshi students: A cross-sectional pilot study. PsyArXiv May 15 doi:1031234/osfio/97s5r 2020.                               |
| Ahmad et al, India            | Factors influencing mental health during COVID-19 outbreak: An exploratory survey among Indian population. medRxiv 2020: 2020.05.03.20081380.                                                                        |
| Balhara et al, India          | Impact of lockdown following COVID-19 on the gaming behavior of college students. Indian J Public Health 2020; 64(Supplement): S172-s6.                                                                              |
| Saikarthik et al, India       | Assessment of impact of COVID-19 outbreak & lockdown on mental health status & its associated risk and protective factors in adult Indian population. medRxiv 2020: 2020.06.13.20130153.                             |

Abbreviations: U.S., United states.

**Table S3** Included Studies in the Systematic Review and Meta-Analysis (Continued)

| Author, Country                           | Title                                                                                                                                                                                                                                                                                |
|-------------------------------------------|--------------------------------------------------------------------------------------------------------------------------------------------------------------------------------------------------------------------------------------------------------------------------------------|
| <b>South-East Asia Region (Continued)</b> |                                                                                                                                                                                                                                                                                      |
| Vidyadhara et al, India                   | Mental health status among the South Indian pharmacy students during Covid-19 pandemic quarantine period: A cross-sectional study. medRxiv 2020: 2020.05.08.20093708.                                                                                                                |
| Varshney et al, India                     | Initial psychological impact of COVID-19 and its correlates in Indian Community: An online (FEEL-COVID) survey. PLoS One 2020; 15(5): e0233874.                                                                                                                                      |
| Sigdel et al, Nepal                       | Depression, Anxiety and Depression-anxiety comorbidity amid COVID-19 Pandemic: An online survey conducted during lockdown in Nepal. medRxiv 2020: 2020.04.30.20086926.                                                                                                               |
| Nochaiwong et al, Thailand                | Mental health circumstances among health care workers and general public under the pandemic situation of COVID-19 (HOME-COVID-19). Medicine (Baltimore). 2020 Jun 26;99(26):e20751.                                                                                                  |
| <b>European Region</b>                    |                                                                                                                                                                                                                                                                                      |
| Rauschenberg et al, Germany               | Social isolation, mental health and use of digital interventions in youth during the COVID-19 pandemic: a nationally representative survey. PsyArXiv published online June 29 DOI:1031234/osfio/v64hf 2020.                                                                          |
| Voitsidis et al, Greece                   | Insomnia during the COVID-19 pandemic in a Greek population. Psychiatry Research 2020; 289.                                                                                                                                                                                          |
| Hyland et al, Ireland                     | Anxiety and Depression in the Republic of Ireland During the COVID-19 Pandemic. PsyArXiv April 22 doi:1031234/osfio/8yqxr 2020.                                                                                                                                                      |
| Cellini et al, Italy                      | Changes in sleep pattern, sense of time and digital media use during COVID-19 lockdown in Italy. Journal of Sleep Research 2020.                                                                                                                                                     |
| Costantini et al, Italy                   | Italian validation of CoViD-19 Peritraumatic Distress Index and preliminary data in a sample of general population. Riv Psichiatri 2020; 55(3): 145-51.                                                                                                                              |
| Forte et al, Italy                        | COVID-19 pandemic in the Italian population: Validation of a post-traumatic stress disorder questionnaire and prevalence of PTSD symptomatology. Int J Environ Res Public Health 2020; 17(11).                                                                                       |
| Mazza et al, Italy                        | A nationwide survey of psychological distress among Italian people during the COVID-19 pandemic: Immediate psychological responses and associated factors. Int J Environ Res Public Health 2020; 17(9).                                                                              |
| Moccia et al, Italy                       | Affective temperament attachment style and the psychological impact of the COVID-19 outbreak: an early report on the Italian general population. Brain, Behavior and Immunity. 2020.                                                                                                 |
| Rossi et al, Italy                        | COVID-19 pandemic and lockdown measures impact on mental health among the general population in Italy. An N=18147 web-based survey. medRxiv 2020: 2020.04.09.20057802.                                                                                                               |
| Ebrahimi et al, Norway                    | The mental health impact of non-pharmacological interventions aimed at impeding viral transmission during the COVID-19 pandemic in a general adult population and the factors associated with adherence to these mitigation strategies. PsyArXiv May 9 doi:1031234/osfio/kjzsp 2020. |
| Moreira et al, Portugal                   | Protective elements of mental health status during the COVID-19 outbreak in the Portuguese population. medRxiv 2020: 2020.04.28.20080671.                                                                                                                                            |
| Gómez-Salgado et al, Spain                | Related health factors of psychological distress during the COVID-19 pandemic in Spain. Int J Environ Res Public Health 2020; 17(11).                                                                                                                                                |
| González-Sanguino et al, Spain            | Mental health consequences during the initial stage of the 2020 coronavirus pandemic (COVID-19) in Spain. Brain Behav Immun 2020.                                                                                                                                                    |
| Munoz-Navarro et al, Spain                | Emotional distress and associated sociodemographic risk factors during the COVID-19 outbreak in Spain. medRxiv 2020: 2020.05.30.20117457.                                                                                                                                            |
| Odrizola-González et al, Spain            | Psychological effects of the COVID-19 outbreak and lockdown among students and workers of a Spanish university. Psychiatry Res 2020; 290: 113108.                                                                                                                                    |
| Ozamiz-Etxebarria et al, Spain            | Psychological symptoms during the two stages of lockdown in response to the COVID-19 outbreak: An investigation in a sample of citizens in Northern Spain. Front Psychol 2020; 11: 1491.                                                                                             |

**Table S3** Included Studies in the Systematic Review and Meta-Analysis (Continued)

| Author, Country                     | Title                                                                                                                                                                                                                                                     |
|-------------------------------------|-----------------------------------------------------------------------------------------------------------------------------------------------------------------------------------------------------------------------------------------------------------|
| <b>European Region (Continued)</b>  |                                                                                                                                                                                                                                                           |
| Parrado-González et al, Spain       | Covid-19: factors associated with emotional distress and psychological morbidity in Spanish population. <i>Rev Esp Salud Publica</i> 2020; 94.                                                                                                            |
| Hakansson et al, Sweden             | Changes in gambling behavior during the COVID-19 pandemic-A web survey study in Sweden. <i>Int J Environ Res Public Health</i> 2020; 17(11).                                                                                                              |
| Özdin et al, Turkey                 | Levels and predictors of anxiety, depression and health anxiety during COVID-19 pandemic in Turkish society: The importance of gender. <i>Int J Soc Psychiatry</i> 2020: 20764020927051.                                                                  |
| Seyahi et al, Turkey                | The psychological state and changes in the routine of the patients with rheumatic diseases during the coronavirus disease (COVID-19) outbreak in Turkey: a web-based cross-sectional survey. <i>Rheumatol Int</i> 2020; 40(8): 1229-38.                   |
| Fancourt et al, UK                  | Trajectories of depression and anxiety during enforced isolation due to COVID-19: longitudinal analyses of 59,318 adults in the UK with and without diagnosed mental illness. <i>medRxiv</i> 2020: 2020.06.03.20120923.                                   |
| Jia et al, UK                       | Mental health in the UK during the COVID-19 pandemic: early observations. <i>medRxiv</i> 2020: 2020.05.14.20102012.                                                                                                                                       |
| Kwong et al, UK                     | Mental health during the COVID-19 pandemic in two longitudinal UK population cohorts. <i>medRxiv</i> 2020: 2020.06.16.20133116.                                                                                                                           |
| Levita et al, UK                    | Impact of COVID-19 on young people aged 13-24 in the UK- preliminary findings. <i>PsyArXiv</i> published online June 30 DOI:1031234/osfio/uq4rn 2020.                                                                                                     |
| Li et al, UK                        | Prevalence and predictors of general psychiatric disorders and loneliness during COVID-19 in the United Kingdom: Results from the Understanding Society UKHLS. <i>medRxiv</i> 2020: 2020.06.09.20120139.                                                  |
| Shevlin et al, UK                   | Anxiety, depression, traumatic stress, and COVID-19 related anxiety in the UK general population during the COVID-19 pandemic. <i>PsyArXiv</i> published online April 18 DOI:1031234/osfio/hb6nq 2020.                                                    |
| Smith et al, UK                     | Factors associated with self-reported anxiety, depression, and general health during the UK lockdown; a cross-sectional survey. <i>medRxiv</i> 2020: 2020.06.23.20137901.                                                                                 |
| <b>Eastern Mediterranean Region</b> |                                                                                                                                                                                                                                                           |
| El-Zoghby et al, Egypt              | Impact of the COVID-19 pandemic on mental health and social support among adult Egyptians. <i>J Community Health</i> 2020; 45(4): 689-95.                                                                                                                 |
| Afshar Jahanshahi et al, Iran       | The distress of Iranian adults during the COVID-19 pandemic - More distressed than the Chinese and with different predictors. <i>Brain Behav Immun</i> 2020.                                                                                              |
| Chen et al, Iran                    | The curvilinear relationship between the age of adults and their mental health in Iran after its peak of COVID-19 cases. <i>medRxiv</i> 2020: 2020.06.11.20128132.                                                                                        |
| Moghanibashi-Mansourieh et al, Iran | Assessing the anxiety level of Iranian general population during COVID-19 outbreak. <i>Asian Journal of Psychiatry</i> . 2020;51.                                                                                                                         |
| Al-Tammemi et al, Jordan            | Is it just about physical health? An internet-based cross-sectional study exploring the psychological impacts of COVID-19 pandemic on university students in Jordan using Kessler psychological distress scale. <i>medRxiv</i> 2020: 2020.05.14.20102343. |
| Naser et al, Jordan                 | Mental health status of the general population, healthcare professionals, and university students during 2019 coronavirus disease outbreak in Jordan: A cross-sectional study. <i>Brain Behav</i> . 2020 Jun 24;e01730. doi: 10.1002/brb3.1730.           |
| Salman et al, Pakistan              | Psychological impact of COVID-19 on Pakistani university students and how they are coping. <i>medRxiv</i> 2020: 2020.05.21.20108647.                                                                                                                      |
| Alyami et al, Saudi Arabia          | Depression and anxiety during 2019 coronavirus disease pandemic in Saudi Arabia: a cross-sectional study. <i>medRxiv</i> 2020: 2020.05.09.20096677.                                                                                                       |

Abbreviations: UK, United Kingdom.

**Table S3** Included Studies in the Systematic Review and Meta-Analysis (Continued)

| Author, Country                                 | Title                                                                                                                                                                                                                          |
|-------------------------------------------------|--------------------------------------------------------------------------------------------------------------------------------------------------------------------------------------------------------------------------------|
| <b>Eastern Mediterranean Region (Continued)</b> |                                                                                                                                                                                                                                |
| Joseph et al, Saudi Arabia                      | The immediate psychological response of the general population in Saudi Arabia during COVID-19 pandemic: a cross-sectional study. medRxiv 2020: 2020.06.19.20135533.                                                           |
| Fekih-Romdhane et al, Tunisia                   | Prevalence and predictors of PTSD during the COVID-19 pandemic: Findings from a Tunisian community sample. Psychiatry Research 2020; 290.                                                                                      |
| Saddik et al, UAE                               | Assessing the influence of parental anxiety on childhood anxiety during the COVID-19 pandemic in the United Arab Emirates. medRxiv 2020: 2020.06.11.20128371.                                                                  |
| Saddik et al, UAE                               | Increased levels of anxiety among medical and non-medical university students during the COVID-19 pandemic in the United Arab Emirates. medRxiv 2020: 2020.05.10.20096933.                                                     |
| <b>Western Pacific Region</b>                   |                                                                                                                                                                                                                                |
| Collie et al, Australia                         | Psychological distress among people losing work during the COVID-19 pandemic in Australia. medRxiv 2020: 2020.05.06.20093773.                                                                                                  |
| Newby et al, Australia                          | Acute mental health responses during the COVID-19 pandemic in Australia. medRxiv 2020: 2020.05.03.20089961.                                                                                                                    |
| Phillipou et al, Australia                      | Eating and exercise behaviors in eating disorders and the general population during the COVID-19 pandemic in Australia: Initial results from the COLLATE project. Int J Eat Disord 2020.                                       |
| Stanton et al, Australia                        | Depression, anxiety and stress during COVID-19: Associations with changes in physical activity, sleep, tobacco and alcohol use in Australian adults. Int J Environ Res Public Health 2020; 17(11).                             |
| Ahmed et al, China                              | Epidemic of COVID-19 in China and associated psychological problems. Asian Journal of Psychiatry. 2020;51.                                                                                                                     |
| Cao et al, China                                | The psychological impact of the COVID-19 epidemic on college students in China. Psychiatry Res. 2020;287:112934.                                                                                                               |
| Chang et al, China                              | Mental health status and its influencing factors among college students during the epidemic of COVID-19. Nan Fang Yi Ke Da Xue Xue Bao 2020; 40(2): 171-6.                                                                     |
| Chen et al, China                               | Public anxiety and its influencing factors in the initial outbreak of COVID-19. Fudan University Journal of Medical Sciences 2020; 47(3): 385-91.                                                                              |
| Elhai et al, China                              | COVID-19 anxiety symptoms associated with problematic smartphone use severity in Chinese adults. Journal of Affective Disorders 2020; 274: 576-82.                                                                             |
| Gao et al, China                                | Mental health problems and social media exposure during COVID-19 outbreak. PLoS ONE. 2020;15(4).                                                                                                                               |
| Guo et al, China                                | Coping with COVID-19: Exposure to COVID-19 and negative impact on livelihood predict elevated mental health problems in Chinese adults. Int J Environ Res Public Health 2020; 17(11).                                          |
| Huang et al, China                              | Generalized anxiety disorder, depressive symptoms and sleep quality during COVID-19 outbreak in China: a web-based cross-sectional survey. Psychiatry Research. 2020;288.                                                      |
| Lei et al, China                                | Comparison of prevalence and associated factors of anxiety and depression among people affected by versus people unaffected by quarantine during the COVID-19 epidemic in Southwestern China. Med Sci Monit. 2020;26:e924609.  |
| Li et al, China                                 | Insomnia and psychological reactions during the COVID-19 outbreak in China. J Clin Sleep Med 2020.                                                                                                                             |
| Li et al, China                                 | Psychological distress among health professional students during the COVID-19 outbreak. Psychol Med 2020: 1-3.                                                                                                                 |
| Liang et al, China                              | The effect of COVID-19 on youth mental health. Psychiatr Q 2020: 1-12.                                                                                                                                                         |
| Liu et al, China                                | Online mental health survey in a medical college in China during the COVID-19 outbreak. Frontiers in Psychiatry 2020; 11.                                                                                                      |
| Liu et al, China                                | Psychological status and behavior changes of the public during the COVID-19 epidemic in China. Infect Dis Poverty 2020; 9(1): 58.                                                                                              |
| Ni et al, China                                 | Mental health, risk factors, and social media use during the COVID-19 epidemic and cordon sanitaire among the community and health professionals in Wuhan, China: Cross-Sectional Survey. JMIR Ment Health 2020; 7(5): e19009. |

Abbreviations: UAE, United Arab Emirates.

**Table S3** Included Studies in the Systematic Review and Meta-Analysis (Continued)

| Author, Country                           | Title                                                                                                                                                                                                                             |
|-------------------------------------------|-----------------------------------------------------------------------------------------------------------------------------------------------------------------------------------------------------------------------------------|
| <b>Western Pacific Region (Continued)</b> |                                                                                                                                                                                                                                   |
| Qiu et al, China <sup>†</sup>             | A nationwide survey of psychological distress among Chinese people in the COVID-19 epidemic: implications and policy recommendations. <i>Gen Psychiatr</i> 2020; 33(2): e100213.                                                  |
| Ren et al, China                          | Letter to the Editor "A longitudinal study on the mental health of general population during the COVID-19 epidemic in China". <i>Brain Behav Immun</i> 2020.                                                                      |
| Shi et al, China                          | Prevalence of and risk factors associated with mental health symptoms among the general population in China during the coronavirus disease 2019 pandemic. <i>JAMA Netw Open</i> 2020; 3(7): e2014053.                             |
| Sun et al, China                          | Prevalence and risk factors of acute posttraumatic stress symptoms during the COVID-19 outbreak in Wuhan, China. <i>medRxiv</i> 2020: 2020.03.06.20032425.                                                                        |
| Sun et al, China                          | Psychiatric symptoms, risk, and protective factors among university students in quarantine during the COVID-19 pandemic in China. <i>medRxiv</i> 2020: 2020.07.03.20144931.                                                       |
| Tan et al, China                          | Is returning to work during the COVID-19 pandemic stressful? A study on immediate mental health status and psychoneuroimmunity prevention measures of Chinese workforce. <i>Brain Behavior and Immunity</i> . 2020.               |
| Tang et al, China                         | COVID-19 related depression and anxiety among quarantined respondents. <i>Psychol Health</i> 2020: 1-15.                                                                                                                          |
| Tang et al, China                         | Prevalence and correlates of PTSD and depressive symptoms one month after the outbreak of the COVID-19 epidemic in a sample of home-quarantined Chinese university students. <i>J Affect Disord</i> 2020; 274: 1-7.               |
| Tian et al, China                         | Psychological symptoms of ordinary Chinese citizens based on SCL-90 during the level I emergency response to COVID-19. <i>Psychiatry Research</i> . 2020;288.                                                                     |
| Wang et al, China                         | Immediate psychological responses and associated factors during the initial stage of the 2019 coronavirus disease (COVID-19) epidemic among the general population in China. <i>Int J Environ Res Public Health</i> . 2020;17(5). |
| Wang et al, China                         | Study on the public psychological states and its related factors during the outbreak of coronavirus disease 2019 (COVID-19) in some regions of China. <i>Psychology health &amp; medicine</i> . 2020:1-10.                        |
| Ying et al, China                         | Mental health status among family members of health care workers in Ningbo, China during the Coronavirus Disease 2019 (COVID-19) outbreak: a Cross-sectional Study. <i>medRxiv</i> 2020: 2020.03.13.20033290.                     |
| Zhang et al, China                        | Mental health and psychosocial problems of medical health workers during the COVID-19 epidemic in China. <i>Psychotherapy and psychosomatics</i> . 2020:1-9.                                                                      |
| Zhang et al, China                        | Impact of the COVID-19 pandemic on mental health and quality of life among local residents in Liaoning Province China: A cross-sectional study. <i>Int J Environ Res Public Health</i> . 2020;17(7).                              |
| Zhang et al, China                        | Mental health problems during the COVID-19 pandemics and the mitigation effects of exercise: A longitudinal study of college students in China. <i>Int J Environ Res Public Health</i> 2020; 17(10).                              |
| Zhao et al, China                         | Perceived stress and sleep quality among the non-diseased general public in China during the 2019 coronavirus disease: a moderated mediation model. <i>Sleep Medicine</i> 2020.                                                   |
| Zhao et al, China                         | Mental health and its influencing factors among self-isolating ordinary citizens during the beginning epidemic of COVID-19. <i>Journal of Loss and Trauma</i> 2020.                                                               |
| Zhou et al, China                         | Prevalence and socio-demographic correlates of psychological health problems in Chinese adolescents during the outbreak of COVID-19. <i>European Child and Adolescent Psychiatry</i> 2020.                                        |
| Zhu et al, China                          | The immediate mental health impacts of the COVID-19 pandemic among people with or without quarantine managements. <i>Brain Behav Immun</i> 2020.                                                                                  |

<sup>†</sup>Includes mainland China, Hong Kong, Macau, and Taiwan.

**Table S3** Included Studies in the Systematic Review and Meta-Analysis (Continued)

| <b>Author, Country</b>                    | <b>Title</b>                                                                                                                                                                                         |
|-------------------------------------------|------------------------------------------------------------------------------------------------------------------------------------------------------------------------------------------------------|
| <b>Western Pacific Region (Continued)</b> |                                                                                                                                                                                                      |
| Choi et al, Hong Kong                     | Depression and anxiety in Hong Kong during COVID-19. <i>Int J Environ Res Public Health</i> 2020; 17(10).                                                                                            |
| Tso et al, Hong Kong                      | Alarming levels of psychiatric symptoms and the role of loneliness during the COVID-19 epidemic: A case study of Hong Kong. . <i>PsyArXiv</i> published online June 27 DOI:1031234/osfio/wv9y2 2020. |
| Ueda et al, Japan                         | Mental health status of the general population during the COVID-19 pandemic: A cross-sectional national survey in Japan. <i>medRxiv</i> 2020: 2020.04.28.20082453.                                   |
| Dai et al, Malaysia                       | Health condition and test availability as predictors of adults' mental health during the COVID-19 pandemic. <i>medRxiv</i> 2020: 2020.06.21.20137000.                                                |
| Sibley et al, New Zealand                 | Effects of the COVID-19 pandemic and nationwide lockdown on trust, attitudes toward government, and well-being. <i>Am Psychol</i> 2020.                                                              |
| Nguyen et al, Vietnam                     | Fear of COVID-19 scale-associations of its scores with health literacy and health-related behaviors among medical students. <i>Int J Environ Res Public Health</i> 2020; 17(11).                     |

**Table S4** Characteristics of the 107 Included Studies

| Author, country               | Article type                                          | Sample size | Mean age (SD), year | No. of female (%) | Study design (data collection)             | Period of collecting        | Outcomes reported                                                    | Measurement tool (diagnostic cut-off)                                                         |
|-------------------------------|-------------------------------------------------------|-------------|---------------------|-------------------|--------------------------------------------|-----------------------------|----------------------------------------------------------------------|-----------------------------------------------------------------------------------------------|
| <b>Africa Region</b>          |                                                       |             |                     |                   |                                            |                             |                                                                      |                                                                                               |
| Olaseni et al, Nigeria        | Preprint reporting data                               | 502         | 28.8 (8.2)          | 225 (44.8)        | Cross-sectional study (online survey)      | Mar 20 to Apr 19, 2020      | Depression (23.5%), anxiety (49.6%), PTSS (42.8%), insomnia (15.1%)  | PHQ-9 ( $\geq 10$ ); GAD-7 ( $\geq 10$ ); IES-R ( $\geq 33$ ); ISI ( $\geq 15$ )              |
| Kim et al, South Africa       | Preprint reporting data                               | 221         | 46.3 (12.9)         | 162 (73.3)        | Longitudinal survey (telephone survey)     | Late Mar to early May, 2020 | Depression (14.5%)                                                   | CES-D ( $\geq 10$ )                                                                           |
| <b>Region of the Americas</b> |                                                       |             |                     |                   |                                            |                             |                                                                      |                                                                                               |
| Filgueiras, Brazil            | Preprint reporting data                               | 360         | 37.9 (12.3)         | 248 (68.9)        | Longitudinal survey (online survey)        | Mar 20 to Mar 25, 2020      | Depression (62.2%), anxiety (51.7%), stress (65.8%)                  | FDI ( $\geq 53.3$ ); STAI ( $\geq 36.5$ for men, $\geq 43.7$ for women); PSS-10 ( $\geq 17$ ) |
| Hubner, Brazil                | Preprint reporting data                               | 654         | NR                  | 501 (76.6)        | Cross-sectional study (online survey)      | May 12 to May 18, 2020      | Psychological distress (87.9%)                                       | CPDI ( $\geq 28$ )                                                                            |
| Sartorao et al, Brazil        | Preprint reporting data                               | 340         | NR                  | 251 (73.8)        | Cross-sectional study (online survey)      | May 18 to May 19, 2020      | Depression (64.4%), anxiety (46.2%)                                  | PHQ-9 ( $\geq 10$ ); GAD-7 ( $\geq 10$ )                                                      |
| Zhang et al, Brazil           | Preprint reporting data                               | 638         | NR                  | 368 (57.7)        | Cross-sectional study (online survey)      | Mar 25 to Mar 28, 2020      | Psychological distress (70.8%)                                       | CPDI ( $\geq 28$ )                                                                            |
| Garcia-Priego et al, Mexico   | Preprint reporting data                               | 561         | 30.7 (10.6)         | 400 (71.3)        | Cross-sectional study (online survey)      | Mar 23 to Apr 21, 2020      | Depression (27.6%), anxiety (49.9%)                                  | HADS: depression ( $\geq 8$ ), anxiety ( $\geq 8$ )                                           |
| Bryan et al, U.S.             | Preprint reporting data                               | 10,625      | 45.2 (17.0)         | 5,389 (50.7)      | Cross-sectional study (online survey)      | Mar 18 to Apr 4, 2020       | Depression (19.5%), suicide ideation (4.6%), suicide attempts (1.2%) | PHQ-9 ( $\geq 14$ ); suicide ideation and attempts in the past month (yes/no)                 |
| Kantor et al, U.S.            | Preprint reporting data                               | 1,005       | 45.0 (16.0)         | 518 (51.2)        | Cross-sectional study (online survey)      | Mar 29 to Mar 31, 2020      | Depression (23.1%), anxiety (26.3%)                                  | PHQ-9 ( $\geq 10$ ); GAD-7 ( $\geq 10$ )                                                      |
| Killgore et al, U.S.          | Short communication/ letter to editor/ correspondence | 1,013       | NR                  | 446 (44.0)        | Cross-sectional study (NR)                 | Apr 9 to Apr 10, 2020       | Depression (32.2%), loneliness (43.0%), suicide ideation (17.6%)     | PHQ-9 ( $\geq 10$ ); UCLA-Loneliness ( $\geq 47$ ); suicide ideation (based on Q9 of PHQ-9)   |
| Lan et al, U.S.               | Preprint reporting data                               | 99          | 49.0 (14.1)         | 49 (47.1)         | Cross-sectional study (paper-based survey) | Early May 2020 (NS)         | Depression (8.1%), anxiety (24.2%)                                   | PHQ-9 ( $\geq 5$ ); GAD-7 ( $\geq 5$ )                                                        |

Abbreviations: CES-D, Center for Epidemiologic Studies Depression Scale; CPDI, COVID-19 Peri-traumatic Distress Index; DASS-21, Depression, Anxiety and Stress Scale-21; FDI, Filgueiras Depression Inventory; GAD-7, General Anxiety Disorder-7; HADS, Hospital Anxiety and Depression Scale; IES-R, Impact of Event Scale-Revised; ISI, Insomnia Severity Index; NR, not reported; NS, not specified; PHQ-9, Patient Health Questionnaire-9; Perceived Stress Scale-10; PTSS, post-traumatic stress symptoms; STAI, State-Trait Anxiety Inventory; UCLA-Loneliness, University of California, Los Angeles-Loneliness.

**Table S4** Characteristics of the 107 Included Studies (Continued)

| Author, country                           | Article type                                          | Sample size | Mean age (SD), year | No. of female (%) | Study design (data collection)        | Period of collecting           | Outcomes reported                                                                   | Measurement tool (diagnostic cut-off)                                                           |
|-------------------------------------------|-------------------------------------------------------|-------------|---------------------|-------------------|---------------------------------------|--------------------------------|-------------------------------------------------------------------------------------|-------------------------------------------------------------------------------------------------|
| <b>Region of the Americas (Continued)</b> |                                                       |             |                     |                   |                                       |                                |                                                                                     |                                                                                                 |
| Lee et al, U.S.                           | Short communication/ letter to editor/ correspondence | 1237        | Median 35 (NR)      | 558 (45.1)        | Cross-sectional study (online survey) | Apr 2 2020                     | Depression (40.3%), anxiety (36.0%)                                                 | PHQ-9 ( $\geq 10$ ); GAD-7 ( $\geq 10$ )                                                        |
| Liu et al, U.S.                           | Published article                                     | 898         | 24.5 (NR)           | 730 (81.3)        | Cross-sectional study (online survey) | Apr 13 to May 19, 2020         | Depression (43.3%), anxiety (45.4%), PTSS (31.8%), loneliness (61.5%)               | PHQ-8 ( $\geq 10$ ); GAD-7 ( $\geq 10$ ); PCL-5 ( $\geq 45$ ), UCLA-Loneliness-3 ( $\geq 6$ )   |
| Rosenberg et al, U.S.                     | Preprint reporting data                               | 1,010       | Median 48 (32-62)   | 516 (51.1)        | Cross-sectional study (online survey) | Apr 10 to Apr 20, 2020         | Depression (30.1%), loneliness (54.0%)                                              | CES-D ( $\geq 10$ ); UCLA Loneliness-3 ( $\geq 4$ )                                             |
| <b>South-East Asia Region</b>             |                                                       |             |                     |                   |                                       |                                |                                                                                     |                                                                                                 |
| Banna et al, Bangladesh                   | Preprint reporting data                               | 1,427       | 25.8 (6.8)          | 407 (28.5)        | Cross-sectional study (online survey) | Apr 29 to May 7, 2020          | Depression (57.9%), anxiety (33.7%), stress (59.7%)                                 | DASS-21: depression ( $\geq 10$ ), anxiety ( $\geq 7$ ), stress ( $\geq 11$ )                   |
| Islam et al, Bangladesh                   | Preprint reporting data                               | 3,122       | 21.4 (2.0)          | 1,265 (40.5)      | Cross-sectional study (online survey) | Apr 11 to Apr 24, 2020         | Depression (62.9%), anxiety (63.6%), stress (58.6%)                                 | DASS-21: depression ( $\geq 14$ ), anxiety ( $\geq 10$ ), stress ( $\geq 19$ )                  |
| Khan et al, Bangladesh                    | Preprint reporting data                               | 505         | NR                  | 188 (37.2)        | Cross-sectional study (online survey) | Apr 9 to Apr 23, 2020          | Depression (46.9%), anxiety (33.3%), stress (28.5%), psychological distress (69.3%) | DASS-21: depression ( $\geq 10$ ), anxiety ( $\geq 8$ ), stress ( $\geq 15$ ); ESD ( $\geq 9$ ) |
| Ahmad et al, India                        | Preprint reporting data                               | 392         | 30.3 (9.3)          | 185 (47.2)        | Cross-sectional study (online survey) | Mar 29 to Apr 12, 2020         | Anxiety (25.3%)                                                                     | GAD-7 ( $\geq 10$ )                                                                             |
| Balhara et al, India                      | Published article                                     | 128         | 19.6 (1.9)          | 76 (59.4)         | Cross-sectional study (online survey) | During lockdown, Mar 2020 (NS) | Depression (25.8%), anxiety (17.2%)                                                 | PHQ-9 ( $\geq 10$ ); GAD-7 ( $\geq 10$ )                                                        |
| Saikarthik et al, India                   | Preprint reporting data                               | 873         | 33.6 (12.2)         | 400 (45.9)        | Cross-sectional study (online survey) | May 5 to May 14, 2020          | Depression (18.6%), anxiety (25.7%), stress (22.0%)                                 | DASS-21: depression ( $\geq 10$ ), anxiety ( $\geq 8$ ), stress ( $\geq 15$ )                   |
| Vidyadhara et al, India                   | Preprint reporting data                               | 500         | 21.2 (1.3)          | 326 (65.0)        | Cross-sectional study (online survey) | Apr 23 to Apr 30, 2020         | Depression (42.6%), anxiety (47.0%), stress (32.0%)                                 | DASS-21: depression ( $\geq 10$ ), anxiety ( $\geq 8$ ), stress ( $\geq 15$ )                   |

Abbreviations: CES-D, Center for Epidemiologic Studies Depression Scale; DASS-21, Depression, Anxiety and Stress Scale-21; ESD, Event-Specific Distress; GAD-7, General Anxiety Disorder-7; PCL-5, Posttraumatic Stress Disorder Checklist for Diagnostic and Statistical Manual of Mental Disorders, 5<sup>th</sup>; PHQ-8, Patient Health Questionnaire-8; PHQ-9, Patient Health Questionnaire-9; PTSS, post-traumatic stress symptoms; UCLA-Loneliness, University of California, Los Angeles-Loneliness; United States.



**Table S4** Characteristics of the 107 Included Studies (Continued)

| Author, country                           | Article type                                          | Sample size | Mean age (SD), year | No. of female (%) | Study design (data collection)        | Period of collecting   | Outcomes reported                                                                                                                               | Measurement tool (diagnostic cut-off)                                                                                                                                   |
|-------------------------------------------|-------------------------------------------------------|-------------|---------------------|-------------------|---------------------------------------|------------------------|-------------------------------------------------------------------------------------------------------------------------------------------------|-------------------------------------------------------------------------------------------------------------------------------------------------------------------------|
| <b>South-East Asia Region (Continued)</b> |                                                       |             |                     |                   |                                       |                        |                                                                                                                                                 |                                                                                                                                                                         |
| Varshney et al, India                     | Published article                                     | 653         | 41.8 (13.8)         | 162 (24.8)        | Cross-sectional study (online survey) | Mar 26 to Mar 29, 2020 | PTSS (18.2%)                                                                                                                                    | IES-R ( $\geq 33$ )                                                                                                                                                     |
| Sigdel et al, Nepal                       | Preprint reporting data                               | 349         | 27.8 (NR)           | 160 (45.8)        | Cross-sectional study (online survey) | Apr 9 to Apr 16, 2020  | Depression (34.1%), anxiety (31.2%)                                                                                                             | PHQ-9 ( $\geq 11$ ); GAD-7 ( $\geq 10$ )                                                                                                                                |
| Nochaiwong et al, Thailand                | Preprint reporting data                               | 4,004       | 29.1 (10.8)         | 2619 (65.4)       | Longitudinal survey (online survey)   | Apr 21 to May 4, 2020  | Depression (41.3%), anxiety (22.6%), stress (72.8%), insomnia 53.9%), somatic symptoms (57.9%), low wellbeing (43.7%), suicide ideation (28.4%) | PHQ-9 ( $\geq 9$ ); GAD-7 ( $\geq 8$ ); PSS-10 ( $\geq 14$ ); ISI ( $\geq 8$ ); SSS-8 ( $\geq 8$ ); WHO-5 Wellbeing ( $< 50$ ); suicide ideation (based on Q9 of PHQ-9) |
| <b>European Region</b>                    |                                                       |             |                     |                   |                                       |                        |                                                                                                                                                 |                                                                                                                                                                         |
| Rauschenberg et al, Germany               | Preprint reporting data                               | 666         | 21.3 (2.6)          | 318 (47.8)        | Cross-sectional study (online survey) | May 7 to May 16, 2020  | Psychological distress (56.9%)                                                                                                                  | Kessler-10 ( $\geq 20$ )                                                                                                                                                |
| Voitsidis et al, Greece                   | Short communication/ letter to editor/ correspondence | 2,363       | NR                  | 1,800 (76.2)      | Cross-sectional study (online survey) | Apr 10 to 13, 2020     | Insomnia (37.6%)                                                                                                                                | AIS ( $\geq 6$ )                                                                                                                                                        |
| Hyland et al, Ireland                     | Preprint reporting data                               | 1,041       | 45 (15.8)           | 502 (48.2)        | Cross-sectional study (online survey) | Mar 31 to Apr 5, 2020  | Depression (22.8%), anxiety (20.0%), PTSS (17.7%)                                                                                               | PHQ-9 ( $\geq 10$ ); GAD-7 ( $\geq 10$ ); ITQ (based on diagnostic criteria)                                                                                            |
| Cellini et al, Italy                      | Published article                                     | 1,310       | 23.9 (3.6)          | 880 (67.2)        | Cross-sectional study (online survey) | Mar 24 to 28, 2020     | Depression (24.2%), anxiety (32.6%), stress (50.2%), poor sleep quality (52.4%)                                                                 | DASS-21: depression ( $\geq 14$ ), anxiety ( $\geq 10$ ), stress ( $\geq 19$ ); PSQI ( $\geq 5$ )                                                                       |
| Costantini et al, Italy                   | Published article                                     | 329         | 46.5 (13.6)         | 191 (58.1)        | Cross-sectional study (online survey) | Apr 15 to 24, 2020     | PTSS (13.4%), Psychological distress (25.2%)                                                                                                    | IES-R ( $\geq 50$ ); CPDI ( $\geq 28$ )                                                                                                                                 |
| Forte et al, Italy                        | Published article                                     | 2,286       | 29.6 (11.4)         | 1,706 (74.6)      | Cross-sectional study (online survey) | Mar 18 to Mar 31, 2020 | PTSS (27.5%)                                                                                                                                    | PCL-5 (based on diagnostic criteria of DSM-5)                                                                                                                           |

Abbreviations: AIS, Athens Insomnia Scale; DASS-21, Depression, Anxiety and Stress Scale-21; GAD-7, General Anxiety Disorder-7; IES-R, Impact of Event Scale-Revised; ISI, Insomnia Severity Index; ITQ, International Trauma Questionnaire; NR, not reported; PCL-5, Posttraumatic Stress Disorder Checklist for Diagnostic and Statistical Manual of Mental Disorders, 5<sup>th</sup>; PHQ-9, Patient Health Questionnaire-9; PSQI, Pittsburgh Sleep Quality Index; PSS-10, Perceived Stress Scale-10; PTSS, post-traumatic stress symptoms; SSS-8, Somatic Symptoms Scale-8; WHO, World Health Organization.

**Table S4** Characteristics of the 107 Included Studies (Continued)

| Author, country                    | Article type                                          | Sample size | Mean age (SD), year    | No. of female (%) | Study design (data collection)        | Period of collecting   | Outcomes reported                                                                                               | Measurement tool (diagnostic cut-off)                                                                                    |
|------------------------------------|-------------------------------------------------------|-------------|------------------------|-------------------|---------------------------------------|------------------------|-----------------------------------------------------------------------------------------------------------------|--------------------------------------------------------------------------------------------------------------------------|
| <b>European Region (Continued)</b> |                                                       |             |                        |                   |                                       |                        |                                                                                                                 |                                                                                                                          |
| Mazza et al, Italy                 | Published article                                     | 2,766       | 32.9 (13.2)            | 1,982 (71.6)      | Cross-sectional study (online survey) | Mar 18 to Mar 22, 2020 | Depression (32.7%), anxiety (18.7%), stress (27.2%)                                                             | DASS-21: high/extremely high (NS)                                                                                        |
| Moccia et al, Italy                | Short communication/ letter to editor/ correspondence | 500         | NR                     | 298 (59.6)        | Cross-sectional study (online survey) | Apr 10 to 13, 2020     | Psychological distress (38.0%)                                                                                  | Kessler-10 ( $\geq 20$ )                                                                                                 |
| Rossi et al, Italy                 | Preprint reporting data                               | 18,147      | Median 38.0 (IQR 23.0) | 14,207 (79.5)     | Cross-sectional study (online survey) | Mar 27 to Apr 6, 2020  | Depression (17.1%), anxiety (20.6%), PTSS (36.7%), stress (21.7%), insomnia (7.2%), adjustment disorder (22.8%) | PHQ-9 ( $\geq 15$ ); GAD-7 ( $\geq 15$ ); GPS-PTSS (3/5 of symptoms); PSS-10 ( $\geq 31$ ); ISI ( $\geq 22$ ); IADQ (NS) |
| Ebrahimi et al, Norway             | Preprint reporting data                               | 10,084      | 36 (13.5)              | 7,872 (78.1)      | Cross-sectional study (online survey) | Mar 31 to Apr 7, 2020  | Depression (30.8%), anxiety (27.6%)                                                                             | PHQ-9 ( $\geq 10$ ); GAD-7 ( $\geq 8$ )                                                                                  |
| Moreira et al, Portugal            | Preprint reporting data                               | 1,280       | 37.1 (12.1)            | 1,022 (79.8)      | Cross-sectional study (online survey) | Mar 23, 2020 (NS)      | Depression (18.8%), anxiety (15.9%), stress (19.7%), obsessive compulsive symptoms (12.4%)                      | DASS-21: moderate to extremely severe (NS); OCI ( $\geq 21$ )                                                            |
| Gómez-Salgado et al, Spain         | Published article                                     | 4,180       | 40.3 (13.2)            | 3,092 (74.0)      | Cross-sectional study (online survey) | Mar 26 to Apr 26, 2020 | Psychological distress (72.0%)                                                                                  | GHQ-12 ( $\geq 3$ )                                                                                                      |
| González-Sanguino et al, Spain     | Short communication/ letter to editor/ correspondence | 3,480       | NR                     | 2,610 (75.0)      | Cross-sectional study (online survey) | Mar 21 to Mar 28, 2020 | Depression (18.7%), anxiety (21.6%), PTSS (15.8%)                                                               | PHQ-2 (NS); GAD-2 (NS); PCL-5 (NS)                                                                                       |
| Munoz-Navarro et al, Spain         | Preprint reporting data                               | 1,753       | 40.4 (12.9)            | 1,346 (76.8)      | Cross-sectional study (online survey) | Mar 26 to Apr 25, 2020 | Depression (22.8%), anxiety (20.8%), panic disorder (25.7%)                                                     | PHQ-9 ( $\geq 10$ ); GAD-7 ( $\geq 10$ ); PHQ-PD (based on DSM-4 criteria)                                               |

Abbreviations: DASS-21, Depression, Anxiety and Stress Scale-21; GAD-2, General Anxiety Disorder-2; GAD-7, General Anxiety Disorder-7; GHQ-12, General Health Questionnaire-12; GPS-PTSS, Global Psychotrauma Scale-Post-Traumatic Stress Disorder Subscale; HADS, Hospital Anxiety and Depression Scale; IADQ, International Adjustment Disorder Questionnaire; ISI, Insomnia Severity Index; NR, not reported; NS, not specified; OCI, Obsessive-compulsive Inventory; PCL-5, Posttraumatic Stress Disorder Checklist for Diagnostic and Statistical Manual of Mental Disorders, 5<sup>th</sup>; PHQ-2, Patient Health Questionnaire-2; PHQ-9, Patient Health Questionnaire-9; PHQ-PD, Patient Health Questionnaire-Panic Disorder; PTSS, post-traumatic stress symptoms; UK, United Kingdom; PSS-10, Perceived Stress Scale-10.

**Table S4** Characteristics of the 107 Included Studies (Continued)

| Author, country                    | Article type            | Sample size | Mean age (SD), year | No. of female (%) | Study design (data collection)                    | Period of collecting                                              | Outcomes reported                                                                  | Measurement tool (diagnostic cut-off)                                                            |
|------------------------------------|-------------------------|-------------|---------------------|-------------------|---------------------------------------------------|-------------------------------------------------------------------|------------------------------------------------------------------------------------|--------------------------------------------------------------------------------------------------|
| <b>European Region (Continued)</b> |                         |             |                     |                   |                                                   |                                                                   |                                                                                    |                                                                                                  |
| Odrizola-González et al, Spain     | Published article       | 2,530       | 27.9 (12.4)         | 1,672 (66.1)      | Cross-sectional study (online survey)             | Mar 28 to 4 Apr, 2020                                             | Depression (48.1%), anxiety (35.2%), stress (40.3%), PTSS (50.4%)                  | DASS-21: moderately to extremely severe (NS); IES-R ( $\geq 26$ )                                |
| Ozamiz-Etxebarria et al, Spain     | Published article       | 1,993       | 33.8 (16.6)         | 1,584 (79.5)      | Cross-sectional study (online survey)             | T1: Mar 11 to 18, 2020; T2: Apr 2 to Apr 12, 2020                 | Depression (27.5%), anxiety (26.9%), stress (26.5%)                                | DASS-21: depression ( $\geq 10$ ), anxiety ( $\geq 8$ ), stress ( $\geq 15$ )                    |
| Parrado-González et al, Spain      | Published article       | 1,596       | 38.6 (14.9)         | 1,063 (66.6)      | Cross-sectional study (online survey)             | Mar 26 to Apr 1, 2020                                             | PTSS (44.3%), psychological distress (48.8%)                                       | IES-R ( $\geq 24$ ); GHQ-12 ( $\geq 3$ )                                                         |
| Hakansson et al, Sweden            | Published article       | 2,016       | NR                  | 992 (49.2)        | Cross-sectional study (online survey)             | Apr 24 to May 3, 2020                                             | Psychological distress (44.1%)                                                     | Kessler-6 ( $\geq 5$ )                                                                           |
| Özdin et al, Turkey                | Published article       | 343         | 37.2 (10.3)         | 169 (49.2)        | Cross-sectional study (online survey)             | Apr 14 to Apr 16, 2020                                            | Depression (23.6%), anxiety (45.2%)                                                | HADS: depression ( $\geq 10$ ), anxiety ( $\geq 7$ )                                             |
| Seyahi et al, Turkey               | Published article       | 917         | Median 35.0 (NR)    | 659 (71.9)        | Cross-sectional study (online survey)             | Apr 4 to Apr 24, 2020                                             | Depression (40.7%), anxiety (22.0%), PTSS (25.3%)                                  | HADS: depression ( $\geq 8$ ), anxiety ( $\geq 11$ ); IES-R ( $\geq 33$ )                        |
| Fancourt et al, UK                 | Preprint reporting data | 53,328      | NR                  | 38,929 (73.0)     | Longitudinal survey (online survey)               | Mar 21 to May 10, 2020                                            | Depression (31.4%), anxiety (24.4%)                                                | PHQ-9 ( $\geq 10$ ); GAD-7 ( $\geq 10$ )                                                         |
| Jia et al, UK                      | Preprint reporting data | 3,097       | NR                  | 2,618 (84.5)      | Cross-sectional study (online survey)             | Apr 3 to Apr 30, 2020                                             | Depression (31.4%), anxiety (26.0%)                                                | PHQ-9 ( $\geq 10$ ); GAD-7 ( $\geq 10$ )                                                         |
| Kwong et al, UK                    | Preprint reporting data | 10,659      | 48.5 (5.8)          | 5,945 (55.8)      | Longitudinal survey (online survey)               | Cohort 1: Apr 9 to May 14, 2020; cohort 2: Apr 17 to May 17, 2020 | Depression (18.1%), anxiety (24.0%), low wellbeing (13.0%)                         | PHQ-9 ( $\geq 10$ ) or SMFQ ( $\geq 11$ ), GAD-7 ( $\geq 10$ ), SWEMWBS ( $\leq 17$ )            |
| Levita et al, UK                   | Preprint reporting data | 1,971       | NR                  | 1,301 (66.0)      | Longitudinal survey (online survey)               | Apr 21 to Apr 29, 2020                                            | Depression (34.7%), anxiety (55.6%), PTSS (5.4%), somatic symptoms (54.6%)         | HADS: depression ( $\geq 10$ ), anxiety ( $\geq 12$ ); CRIES-8 ( $\geq 17$ ); SSS-8 ( $\geq 8$ ) |
| Li et al, UK                       | Preprint reporting data | 15,530      | 51.6 (NR)           | 9,045 (58.2)      | Longitudinal survey (online and telephone survey) | Apr 24 to Apr 30, 2020                                            | Depression (18.6%), psychological distress (37.1%), psychological symptoms (29.2%) | GHQ-12: depression ( $\geq 6$ ), distress ( $\geq 3$ ), psychological symptoms ( $\geq 4$ )      |

Abbreviations: CRIES-8, Children's Revised Impact of Event Scale-8; DASS-21, Depression, Anxiety and Stress Scale-21; GAD-2, General Anxiety Disorder-2; GAD-7, General Anxiety Disorder-7; GHQ-12, General Health Questionnaire-12; HADS, Hospital Anxiety and Depression Scale; IES-R, Impact of Event Scale-Revised; NR, not reported; NS, not specified; PHQ-2, Patient Health Questionnaire-2; PHQ-9, Patient Health Questionnaire-9; PTSS, post-traumatic stress symptoms; SMFQ, Short Mood and Feelings Questionnaire; SSS-8, Somatic Symptoms Scale-8; SWEMWBS, Short Warwick Edinburgh Mental Well-Being Scale; UK, United Kingdom.

**Table S4** Characteristics of the 107 Included Studies (Continued)

| Author, country                     | Article type                                          | Sample size | Mean age (SD), year | No. of female (%) | Study design (data collection)        | Period of collecting   | Outcomes reported                                                   | Measurement tool (diagnostic cut-off)                                        |
|-------------------------------------|-------------------------------------------------------|-------------|---------------------|-------------------|---------------------------------------|------------------------|---------------------------------------------------------------------|------------------------------------------------------------------------------|
| <b>European Region (Continued)</b>  |                                                       |             |                     |                   |                                       |                        |                                                                     |                                                                              |
| Shevlin et al, UK                   | Preprint reporting data                               | 2,025       | 45.4 (15.9)         | 1,047 (51.7)      | Longitudinal survey (online survey)   | Mar 23 to Mar 28, 2020 | Depression (22.1%), anxiety (21.6%), PTSS (16.8%)                   | PHQ-9 ( $\geq 10$ ); GAD-7 ( $\geq 10$ ); ITQ (based on diagnostic criteria) |
| Smith et al, UK                     | Preprint reporting data                               | 2,240       | NR                  | 1,164 (52.0)      | Cross-sectional study (online survey) | May 6 to May 7, 2020   | Depression (23.5%), anxiety (21.9%)                                 | PHQ-2 ( $\geq 3$ ); GAD-2 ( $\geq 3$ )                                       |
| <b>Eastern Mediterranean Region</b> |                                                       |             |                     |                   |                                       |                        |                                                                     |                                                                              |
| El-Zoghby et al, Egypt              | Published article                                     | 510         | NR                  | 336 (65.9)        | Cross-sectional study (online survey) | May 2 to May 9, 2020   | PTSS (52.0%)                                                        | IES-R ( $\geq 33$ )                                                          |
| Afshar Jahanshahi et al, Iran       | Short communication/ letter to editor/ correspondence | 1,058       | NR                  | 569 (53.8)        | Cross-sectional study (online survey) | Mar 25 to Mar 28, 2020 | Psychological distress (61.1%)                                      | CPDI ( $\geq 28$ )                                                           |
| Chen et al, Iran                    | Preprint reporting data                               | 474         | NR                  | 243 (51.3)        | Cross-sectional study (online survey) | Apr 1 to Apr 10, 2020  | Depression (21.9%), anxiety (21.1%), psychological distress (14.8%) | PHQ-2 ( $\geq 3$ ); GAD-2 ( $\geq 3$ ); Kessler-6 ( $\geq 13$ )              |
| Moghanibashi-Mansourieh et al, Iran | Published article                                     | 10,754      | NR                  | 7,073 (65.8)      | Cross-sectional study (online survey) | Mar 1 to Mar 9, 2020   | Anxiety (50.9%)                                                     | DASS-21: anxiety ( $\geq 7$ )                                                |
| Al-Tammemi et al, Jordan            | Preprint reporting data                               | 381         | 22.6 (3.2)          | 199 (52.2)        | Cross-sectional study (online survey) | May 2020 (NS)          | Psychological distress (92.9%)                                      | Kessler-10 ( $\geq 20$ )                                                     |
| Naser et al, Jordan                 | Published article                                     | 2,963       | NR                  | 1,783 (60.2)      | Cross-sectional study (online survey) | Mar 22 to Mar 28, 2020 | Depression (43.6%), anxiety (31.9%)                                 | PHQ-9 ( $\geq 10$ ); GAD-7 ( $\geq 10$ )                                     |
| Salman et al, Pakistan              | Preprint reporting data                               | 1,134       | 21.7 (3.5)          | 799 (70.5)        | Cross-sectional study (online survey) | Apr to May, 2020 (NS)  | Depression (45.0%), anxiety (34.0%)                                 | PHQ-9 ( $\geq 10$ ); GAD-7 ( $\geq 10$ )                                     |
| Alyami et al, Saudi Arabia          | Preprint reporting data                               | 2,081       | NR                  | 677 (32.5)        | Cross-sectional study (online survey) | Mar 27 to Apr 27, 2020 | Depression (29.4%), anxiety (26.5%)                                 | PHQ-9 ( $\geq 10$ ); GAD-7 ( $\geq 10$ )                                     |
| Joseph et al, Saudi Arabia          | Preprint reporting data                               | 584         | NR                  | 223 (38.2)        | Cross-sectional study (online survey) | Apr 12 to May 10, 2020 | Depression (21.9%), anxiety (17.8%), PTSS (51.9%)                   | PHQ-2 ( $\geq 3$ ); GAD-2 ( $\geq 3$ ); IES-6 ( $\geq 9$ )                   |

Abbreviations: CPDI, COVID-19 Peri-traumatic Distress Index; DASS-21, Depression, Anxiety and Stress Scale-21; GAD-2, General Anxiety Disorder-2; GAD-7, General Anxiety Disorder-7; IES-R, Impact of Event Scale-Revised; ITQ, International Trauma Questionnaire; NR, not reported; NS, not specified; PHQ-2, Patient Health Questionnaire-2; PHQ-9, Patient Health Questionnaire-9; PTSS, post-traumatic stress symptoms.

**Table S4** Characteristics of the 107 Included Studies (Continued)

| Author, country                                 | Article type                                          | Sample size | Mean age (SD), year      | No. of female (%)         | Study design (data collection)        | Period of collecting   | Outcomes reported                                                                              | Measurement tool (diagnostic cut-off)                                                                                        |
|-------------------------------------------------|-------------------------------------------------------|-------------|--------------------------|---------------------------|---------------------------------------|------------------------|------------------------------------------------------------------------------------------------|------------------------------------------------------------------------------------------------------------------------------|
| <b>Eastern Mediterranean Region (Continued)</b> |                                                       |             |                          |                           |                                       |                        |                                                                                                |                                                                                                                              |
| Fekih-Romdhane et al, Tunisia                   | Short communication/ letter to editor/ correspondence | 603         | 29.2 (10.4)              | 446 (74.0)                | Cross-sectional study (online survey) | Apr 9 to 15, 2020      | PTSS (33.0%)                                                                                   | IES-R ( $\geq 34$ )                                                                                                          |
| Saddik et al, UAE                               | Preprint reporting data                               | 1,469       | NR                       | 1,216 (82.8)              | Cross-sectional study (online survey) | Mar 24 to May 15, 2020 | Anxiety (49.8%)                                                                                | GAD-7 ( $\geq 8$ )                                                                                                           |
| Saddik et al, UAE                               | Preprint reporting data                               | 1,385       | 20.5 (2.3)               | 994 (71.8)                | Cross-sectional study (online survey) | Mar 11 to Mar 21, 2020 | Anxiety (17.8%)                                                                                | GAD-7 ( $\geq 10$ )                                                                                                          |
| <b>Western Pacific Region (Continued)</b>       |                                                       |             |                          |                           |                                       |                        |                                                                                                |                                                                                                                              |
| Collie et al, Australia                         | Preprint reporting data                               | 551         | NR                       | 431 (78.2)                | Cross-sectional study (online survey) | Mar 27 to Apr 20, 2020 | Psychological distress (77.0%)                                                                 | Kessler-6 ( $\geq 5$ )                                                                                                       |
| Newby et al, Australia                          | Preprint reporting data                               | 5,071       | NR                       | 4,348 (85.8)              | Cross-sectional study (online survey) | Mar 27 to Apr 7, 2020  | Depression (46.3%), anxiety (40.8%), stress (38.7%), alcohol drinking problems (52.7%)         | DASS-21: depression, anxiety, stress; AUDIT-C (hazardous drinking $\geq 3$ for women and other genders and $\geq 4$ for men) |
| Phillipou et al, Australia                      | Published article                                     | 5,289       | 40.6 (13.7)              | 4,231 (80.0)              | Cross-sectional study (online survey) | 1 Apr to 4 Apr, 2020   | Depression (34.3%), anxiety (31.8%), stress (27.8%)                                            | DASS-21: depression ( $\geq 14$ ), anxiety ( $\geq 10$ ), stress ( $\geq 19$ )                                               |
| Stanton et al, Australia                        | Published article                                     | 1,491       | 50.5 (14.9)              | 999 (67.4)                | Cross-sectional study (online survey) | Apr 9 to 19 Apr, 2020  | Depression (26.6%), anxiety (13.5%), stress (18.2%)                                            | DASS-21: depression ( $\geq 7$ ), anxiety ( $\geq 6$ ), stress ( $\geq 10$ )                                                 |
| Ahmed et al, China                              | Published article                                     | 1,074       | 33.5 (11.1)              | 503 (46.8)                | Cross-sectional study (online survey) | NR                     | Depression (37.2%), anxiety (29.1%), low well-being (32.1%), alcohol drinking problems (40.1%) | BDI-II ( $\geq 14$ ); BAI ( $\geq 8$ ); WEMWBS ( $< 43$ ); AUDIT ( $\geq 8$ )                                                |
| Cao et al, China                                | Published article                                     | 7,143       | NR                       | 4,975 (69.6)              | Cross-sectional study (NR)            | NR                     | Anxiety (24.9%)                                                                                | GAD-7 (NS)                                                                                                                   |
| Chang et al, China                              | Published article                                     | 3,881       | 20                       | 2,447 (63.0)              | Cross-sectional study (online survey) | Jan 31 to Feb 3, 2020  | Depression (21.2%), anxiety (26.6%)                                                            | PHQ-9 ( $\geq 5$ ); GAD-7 ( $\geq 6$ )                                                                                       |
| Chen et al, China                               | Published article                                     | 3,015       | 32.3 (10.0) <sup>†</sup> | 3,267 (67.7) <sup>†</sup> | Cross-sectional study (online survey) | Jan 31 to Feb 2, 2020  | Anxiety (23.7%)                                                                                | GAD-7 ( $\geq 10$ )                                                                                                          |

<sup>†</sup>Based on mixed population with regard to the entire sample.

Abbreviations: AUDIT, Alcohol Use Disorders Identification Test; AUDIT-C, Alcohol Use Disorders Identification Test-Concise; BAI, Beck Anxiety Inventory; BDI-II, Beck Depression Inventory-II; DASS-21, Depression, Anxiety and Stress Scale-21; GAD-7, General Anxiety Disorder-7; IES-R, Impact of Event Scale-Revised; NR, not reported; PHQ-9, Patient Health Questionnaire-9; PTSS, post-traumatic stress symptoms; ; UAE, United Arab Emirates; WEMWBS, Warwick-Edinburgh Mental Well-being Scale.

**Table S4** Characteristics of the 107 Included Studies (Continued)

| Author, country                           | Article type                                          | Sample size | Mean age (SD), year     | No. of female (%) | Study design (data collection)        | Period of collecting   | Outcomes reported                                                   | Measurement tool (diagnostic cut-off)                                                 |
|-------------------------------------------|-------------------------------------------------------|-------------|-------------------------|-------------------|---------------------------------------|------------------------|---------------------------------------------------------------------|---------------------------------------------------------------------------------------|
| <b>Western Pacific Region (Continued)</b> |                                                       |             |                         |                   |                                       |                        |                                                                     |                                                                                       |
| Elhai et al, China                        | Published article                                     | 908         | 40.4 (9.3)              | 752 (82.8)        | Cross-sectional study (online survey) | Feb 24 to Mar 15, 2020 | Depression (15.4%), anxiety (10.6%)                                 | DASS-21: depression ( $\geq 6$ ); GAD-7 ( $\geq 9$ )                                  |
| Gao et al, China                          | Published article                                     | 4,576       | NR                      | 3,684 (80.5)      | Cross-sectional study (online survey) | Jan 31 to Feb 2, 2020  | Depression (48.2%), anxiety (22.7%)                                 | WHO-5 Well-Being Index ( $< 13$ ); GAD-7 ( $\geq 10$ )                                |
| Guo et al, China                          | Published article                                     | 2,441       | NR                      | 1,279 (52.4)      | Cross-sectional study (online survey) | Feb 1 to 10 Feb, 2020  | Depression (72.6%), PTSS (79.6%), poor sleep quality (20.6%)        | CES-D ( $\geq 21$ ); PCL-5 (based on diagnostic criteria of DSM-5); PSQI ( $\geq 7$ ) |
| Huang et al, China                        | Published article                                     | 4,986       | 35.3 (5.6) <sup>†</sup> | NR                | Cross-sectional study (online survey) | Feb 3 to Feb 17, 2020  | Depression (20.2%), anxiety (34.9%), poor sleep quality (15.8%)     | CES-D ( $\geq 29$ ); GAD-7 ( $\geq 9$ ); PSQI ( $\geq 8$ )                            |
| Lei et al, China                          | Published article                                     | 1,593       | 32.3 (9.8)              | 976 (61.3)        | Cross-sectional study (online survey) | Early Feb 2020 (NS)    | Depression (14.7%), anxiety (8.3%)                                  | Zung-SDS ( $\geq 50$ ); Zung-SAS ( $\geq 50$ )                                        |
| Li et al, China                           | Short communication/ letter to editor/ correspondence | 3,637       | 34.5 (9.6)              | 2,291 (63.0)      | Cross-sectional study (online survey) | Feb 5 to Feb 19, 2020  | Depression (31.2%), anxiety (27.5%), PTSS (17.6%), insomnia (33.7%) | PHQ-9 ( $\geq 5$ ); GAD-7 ( $\geq 5$ ); IES-R ( $\geq 24$ ); ISI ( $\geq 8$ )         |
| Li et al, China                           | Short communication/ letter to editor/ correspondence | 1,442       | 20 (1.5)                | 891 (61.8)        | Longitudinal survey (online survey)   | Feb 7 to Feb 13, 2020  | PTSS (11.1%), Psychological distress (26.6%)                        | IES-R ( $\geq 24$ ); Kessler-6 ( $\geq 5$ )                                           |
| Liang et al, China                        | Published article                                     | 584         | NR                      | 361 (61.8)        | Cross-sectional study (online survey) | Jan 30, 2020 (NS)      | PTSS (14.4%), psychological problems (40.4%)                        | PCL-5 ( $\geq 38$ ); GHQ-12 ( $\geq 16$ )                                             |
| Liu et al, China                          | Published article                                     | 217         | 21.7 (1.7)              | 127 (58.5)        | Cross-sectional study (online survey) | Feb 23 to Apr 2, 2020  | Depression (11.1%), anxiety (7.4%)                                  | PHQ-9 ( $\geq 10$ ); GAD-7 ( $\geq 10$ )                                              |
| Liu et al, China                          | Published article                                     | 608         | NR                      | 357 (58.7)        | Cross-sectional study (online survey) | Jan 30 to Feb 3, 2020  | Depression (27.1%), anxiety (15.8%), psychological symptoms (7.7%)  | Zung-SDS ( $\geq 50$ ); STAI (norm-based, NS); SCL-90 ( $\geq 160$ )                  |
| Ni et al, China                           | Published article                                     | 1,577       | NR                      | 959 (60.8)        | Cross-sectional study (online survey) | Feb 18 to Feb 24, 2020 | Depression (19.2%), anxiety (23.8%)                                 | PHQ-2 ( $\geq 3$ ); GAD-2 ( $\geq 3$ )                                                |

Abbreviations: CES-D, Center for Epidemiologic Studies Depression Scale; DASS-21, Depression, Anxiety and Stress Scale-21; GAD-2, General Anxiety Disorder-2; GAD-7, General Anxiety Disorder-7; GHQ-12, NR, not reported; NS, not specified; PCL-5, Posttraumatic Stress Disorder Checklist for Diagnostic and Statistical Manual of Mental Disorders, 5<sup>th</sup>; PHQ-2, Patient Health Questionnaire-2; PHQ-9, Patient Health Questionnaire-9; PSQI, Pittsburgh Sleep Quality Index; PTSS, post-traumatic stress symptoms; SCL-90-R, Symptom Checklist-90-Revised; STAI, State-Trait Anxiety Inventory; WHO, World Health Organization; Zung-SDS, Zung-Self-Rating Depression Scale.

**Table S4** Characteristics of the 107 Included Studies (Continued)

| Author, country                           | Article type                                          | Sample size | Mean age (SD), year | No. of female (%) | Study design (data collection)        | Period of collecting   | Outcomes reported                                                                 | Measurement tool (diagnostic cut-off)                                                                                                                              |
|-------------------------------------------|-------------------------------------------------------|-------------|---------------------|-------------------|---------------------------------------|------------------------|-----------------------------------------------------------------------------------|--------------------------------------------------------------------------------------------------------------------------------------------------------------------|
| <b>Western Pacific Region (Continued)</b> |                                                       |             |                     |                   |                                       |                        |                                                                                   |                                                                                                                                                                    |
| Qiu et al, China <sup>†</sup>             | Short communication/ letter to editor/ correspondence | 52,730      | NR                  | 34,131 (64.7)     | Cross-sectional study (online survey) | Jan 31 to 10 Feb, 2020 | Psychological distress (34.4%)                                                    | CPDI ( $\geq 28$ )                                                                                                                                                 |
| Ren et al, China                          | Short communication/ letter to editor/ correspondence | 1,172       | NR                  | NR                | Cross-sectional study (online survey) | Feb 14 to Mar 29, 2020 | Depression (18.8%), anxiety (13.3%), insomnia (7.2%), stress (67.9%), PTSS (7.0%) | PHQ-9 (NS); GAD-7 (NS); PCL-5 (NS); PSS-10 (NS); ISI (NS)                                                                                                          |
| Shi et al, China                          | Published article                                     | 56,679      | 36.0 (8.2)          | 29,530 (52.1)     | Cross-sectional study (online survey) | Feb 28 to Mar 11, 2020 | Depression (10.8%), anxiety (10.4%), stress (24.4%), insomnia (29.2%)             | PHQ-9 ( $\geq 10$ ); GAD-7 ( $\geq 10$ ); ASDS (dissociative $\geq 9$ and cumulative re-experiencing, avoidance, and arousal cluster $\geq 28$ ; ISI ( $\geq 8$ )) |
| Sun et al, China                          | Preprint reporting data                               | 2,091       | NR                  | 1,272 (60.8)      | Cross-sectional study (online survey) | Jan 30 to Feb 3, 2020  | PTSS (4.6%)                                                                       | PCL-5 ( $\geq 33$ )                                                                                                                                                |
| Sun et al, China                          | Preprint reporting data                               | 1,912       | 20.3 (2.1)          | 1,334 (69.8)      | Cross-sectional study (online survey) | Mar 20 to Apr 10, 2020 | Depression (15.6%), anxiety (9.6%), PTSS (17.7%), suicide ideation (19.6%)        | PHQ-9 ( $\geq 10$ ); GAD-7 ( $\geq 10$ ); IES-R ( $\geq 26$ ); suicide ideation in the past two weeks (yes/no)                                                     |
| Tan et al, China                          | Published article                                     | 673         | 30.8 (7.4)          | 172 (25.6)        | Cross-sectional study (online survey) | Feb 24 to Feb 25, 2020 | Depression (5.9%), anxiety (6.1%), stress (3.3%), PTSS (10.8%), insomnia (14.6%)  | DASS-21: NS; IES-R ( $\geq 24$ ); ISI ( $\geq 8$ )                                                                                                                 |
| Tang et al, China                         | Published article                                     | 1,160       | NR                  | 696 (60.0)        | Cross-sectional study (online survey) | Feb 5 to Feb 7, 2020   | Depression (26.5%), anxiety (70.8%)                                               | CES-D ( $\geq 15$ ); GAD-7 ( $\geq 5$ )                                                                                                                            |
| Tang et al, China                         | Published article                                     | 2,485       | 19.8 (1.6)          | 1,525 (61.4)      | Cross-sectional study (online survey) | Feb 20 to Feb 27, 2020 | Depression (9.0%), PTSS (2.7%)                                                    | PHQ-9 ( $\geq 10$ ); PCL-5 ( $\geq 38$ )                                                                                                                           |
| Tian et al, China                         | Published article                                     | 1,060       | 35.0 (12.8)         | 511 (48.2)        | Cross-sectional study (online survey) | Jan 31 to Feb 2, 2020  | Psychological distress (12.5%)                                                    | SCL-90-R: global symptoms index ( $\geq 63$ )                                                                                                                      |
| Wang et al, China                         | Published article                                     | 1,210       | NR                  | 814 (67.3)        | Cross-sectional study (online survey) | Jan 31 to Feb 2, 2020  | Depression (30.3%), anxiety (36.4%), stress (32.1%), PTSS (75.5%)                 | DASS-21: depression ( $\geq 10$ ), anxiety ( $\geq 7$ ), stress; IES-R ( $\geq 24$ )                                                                               |

<sup>†</sup>Includes mainland China, Hong Kong, Macau, and Taiwan.

Abbreviations: ASDS, Acute Stress Disorder Scale; CES-D, Center for Epidemiologic Studies Depression Scale; CPDI, COVID-19 Peri-traumatic Distress Index; DASS-21, Depression, Anxiety and Stress Scale-21; GAD-7, General Anxiety Disorder-7; IES-R, Impact of Event Scale-Revised; ISI, Insomnia Severity Index; NR, not reported; NS, not specified; PHQ-9, Patient Health Questionnaire-9; PSS-10, Perceived Stress Scale-10; PTSS, post-traumatic stress symptoms; SCL-90-R, Symptom Checklist-90-Revised.

**Table S4** Characteristics of the 107 Included Studies (Continued)

| Author, country                           | Article type                                          | Sample size | Mean age (SD), year     | No. of female (%)       | Study design (data collection)        | Period of collecting            | Outcomes reported                                                                                                                          | Measurement tool (diagnostic cut-off)                                                                                              |
|-------------------------------------------|-------------------------------------------------------|-------------|-------------------------|-------------------------|---------------------------------------|---------------------------------|--------------------------------------------------------------------------------------------------------------------------------------------|------------------------------------------------------------------------------------------------------------------------------------|
| <b>Western Pacific Region (Continued)</b> |                                                       |             |                         |                         |                                       |                                 |                                                                                                                                            |                                                                                                                                    |
| Wang et al, China                         | Published article                                     | 600         | 34.0 (12.0)             | 333 (55.5)              | Cross-sectional study (online survey) | Feb 6 to Feb 9, 2020            | Depression (17.2%), anxiety (6.3%)                                                                                                         | Zung-SDS ( $\geq 53$ ); Zung-SAS ( $\geq 50$ )                                                                                     |
| Ying et al, China                         | Preprint reporting data                               | 448         | 38.0 <sup>†</sup> (9.4) | NR                      | Cross-sectional study (online survey) | Feb 2020 (NS)                   | Depression (29.0%), anxiety (32.8%)                                                                                                        | PHQ-9 ( $\geq 5$ ); GAD-7 ( $\geq 5$ )                                                                                             |
| Zhang et al, China                        | Published article                                     | 1,255       | NR                      | 723 (57.6)              | Cross-sectional study (online survey) | Feb 19 to Mar 6, 2020           | Depression (9.5%), anxiety (45.5%), insomnia (30.5%), somatic symptoms (0.4%), obsessive-compulsive symptoms (2.2%), phobic anxiety (2.4%) | PHQ-2 ( $\geq 3$ ); GAD-2 ( $\geq 3$ ); ISI ( $\geq 9$ ), SCL-90-R: obsessive compulsive ( $\geq 2$ ), phobia anxiety ( $\geq 2$ ) |
| Zhang et al, China                        | Published article                                     | 263         | 37.7 (14.0)             | 157 (59.7)              | Cross-sectional study (online survey) | Jan 28 to Feb 5, 2020           | PTSS (7.6%)                                                                                                                                | IES-R ( $\geq 26$ )                                                                                                                |
| Zhang et al, China                        | Published article                                     | 66          | 20.7 (2.1)              | 41 (62.1)               | Longitudinal survey (online survey)   | Feb 19, Mar 5, and Mar 20, 2020 | Depression (22.7%), anxiety (45.5%), stress (28.8%), poor sleep quality (42.4%)                                                            | DASS-21: depression ( $\geq 10$ ), anxiety ( $\geq 8$ ), stress ( $\geq 11$ ); PSQI ( $\geq 5$ )                                   |
| Zhao et al, China                         | Published article                                     | 1,630       | 29.2 (10.6)             | 581 (69.6) <sup>‡</sup> | Cross-sectional study (online survey) | Feb 18 to 25, 2020              | Poor sleep quality (36.4%)                                                                                                                 | PSQI ( $\geq 5$ )                                                                                                                  |
| Zhao et al, China                         | Published article                                     | 515         | NR                      | 342 (66.4)              | Cross-sectional study (online survey) | Jan 26 to Feb 2, 2020           | Depression (29.7%), anxiety (14.4%), PTSS (5.6%)                                                                                           | Zung-SDS ( $\geq 53$ ); Zung-SAS ( $\geq 50$ ); PCL-5 (based on diagnostic criteria of DSM-5)                                      |
| Zhou et al, China                         | Published article                                     | 8,079       | Median 16.0 (NR)        | 4,326 (53.5)            | Cross-sectional study (online survey) | Mar 8 to Mar 15, 2020           | Depression (17.4%), anxiety (10.3%)                                                                                                        | PHQ-9 ( $\geq 10$ ); GAD-7 ( $\geq 10$ )                                                                                           |
| Zhu et al, China                          | Short communication/ letter to editor/ correspondence | 1,753       | NR                      | 1,052 (60.0)            | Cross-sectional study (online survey) | Feb 12 to Mar 17, 2020          | Depression (22.8%), anxiety (22.4%), psychological symptoms (15.6%)                                                                        | PHQ-9 ( $\geq 5$ ); GAD-7 ( $\geq 5$ ); SRQ-20 ( $\geq 7$ )                                                                        |

<sup>†</sup>Based on mixed population with regard to the entire sample.

<sup>‡</sup>Based on the complete case analysis.

Abbreviations: DASS-21, Depression, Anxiety and Stress Scale-21; DSM, The Diagnostic and Statistical Manual of Mental Disorders; GAD-2, General Anxiety Disorder-2; GAD-7, General Anxiety Disorder-7; IES-R, Impact of Event Scale-Revised; ISI, Insomnia Severity Index; NR, not reported; PCL-5, Posttraumatic Stress Disorder Checklist for Diagnostic and Statistical Manual of Mental Disorders, 5<sup>th</sup>; PHQ-2, Patient Health Questionnaire-2; PHQ-9, Patient Health Questionnaire-9; PSQI, Pittsburgh Sleep Quality Index; PSS-10, SCL-90-R, Symptom Checklist-90-Revised; SRQ-20, Self-Reporting Questionnaire-20; Zung-SAS, Zung-Self-Rating Anxiety Scale; Zung-SDS, Zung-Self-Rating Depression Scale.



**Table S4** Characteristics of the 107 Included Studies (Continued)

| Author, country                           | Article type            | Sample size | Mean age (SD), year | No. of female (%) | Study design (data collection)        | Period of collecting                                                                     | Outcomes reported                                    | Measurement tool (diagnostic cut-off)                                          |
|-------------------------------------------|-------------------------|-------------|---------------------|-------------------|---------------------------------------|------------------------------------------------------------------------------------------|------------------------------------------------------|--------------------------------------------------------------------------------|
| <b>Western Pacific Region (Continued)</b> |                         |             |                     |                   |                                       |                                                                                          |                                                      |                                                                                |
| Choi et al, Hong Kong                     | Published article       | 500         | 47.3 (15.8)         | 274 (54.8)        | Cross-sectional study (online survey) | Apr 24 to May 3, 2020                                                                    | Depression (19.8%), anxiety (14.0%)                  | PHQ-9 ( $\geq 10$ ); GAD-7 ( $\geq 10$ )                                       |
| Tso et al, Hong Kong                      | Preprint reporting data | 381         | 33.4 (10.6)         | 246 (56.9)        | Cross-sectional study (online survey) | Mar 31 to May 30, 2020                                                                   | Depression (50.4%), anxiety (128.1%), stress (59.6%) | DASS-21: depression ( $\geq 14$ ), anxiety ( $\geq 10$ ), stress ( $\geq 19$ ) |
| Ueda et al, Japan                         | Preprint reporting data | 2,000       | NR                  | 1,008 (50.4)      | Cross-sectional study (online survey) | Apr 16 to Apr 18, 2020 (1 <sup>st</sup> round); May 15 to May 17 (2 <sup>nd</sup> round) | Depression (17.4%), anxiety (10.9%)                  | PHQ-9 ( $\geq 10$ ); GAD-7 ( $\geq 10$ )                                       |
| Dai et al, Malaysia                       | Preprint reporting data | 669         | NR                  | 345 (51.6)        | Cross-sectional study (online survey) | May 2 to May 8, 2020                                                                     | Insomnia (38.9%)                                     | AIS (NS)                                                                       |
| Sibley et al, New Zealand                 | Published article       | 991         | 51.5 (13.4)         | 651 (64.9)        | Longitudinal survey (online survey)   | Mar 26 to Apr 12, 2020                                                                   | Psychological distress (26.8%)                       | Kessler-6 ( $\geq 13$ )                                                        |
| Nguyen et al, Vietnam                     | Published article       | 5,423       | 22.0 (2.0)          | 2,821 (52.0)      | Cross-sectional study (online survey) | Apr 7 to Apr 29, 2020                                                                    | Anxiety (7.7%)                                       | GAD-7 ( $\geq 8$ )                                                             |

Abbreviations: AIS, Athens Insomnia Scale; DASS-21, Depression, Anxiety and Stress Scale-21; GAD-7, General Anxiety Disorder-7; NR, not reported; PHQ-9, Patient Health Questionnaire-9.

**Table S5** Risk of Bias Assessment of Included Studies<sup>†</sup>

| Author, Country                | External validity |        |        |        | Internal validity |        |        |        |        |         | RoB (Overall) |              |
|--------------------------------|-------------------|--------|--------|--------|-------------------|--------|--------|--------|--------|---------|---------------|--------------|
|                                | Hoy Q1            | Hoy Q2 | Hoy Q3 | Hoy Q4 | Hoy Q5            | Hoy Q6 | Hoy Q7 | Hoy Q8 | Hoy Q9 | Hoy Q10 |               |              |
| <b>Africa Region</b>           |                   |        |        |        |                   |        |        |        |        |         |               |              |
| Olaseni et al, Nigeria         | Yes               | No     | No     | No     | Yes               | Yes    | Yes    | Yes    | Yes    | Yes     | Yes           | 3 (Low)      |
| Kim et al, South Africa        | No                | No     | No     | No     | Yes               | Yes    | Yes    | Yes    | Yes    | Yes     | Yes           | 4 (Moderate) |
| <b>Region of the Americas</b>  |                   |        |        |        |                   |        |        |        |        |         |               |              |
| Filgueiras, Brazil             | Yes               | No     | No     | No     | Yes               | Yes    | Yes    | Yes    | Yes    | Yes     | Yes           | 3 (Low)      |
| Hubner, Brazil                 | No                | No     | No     | No     | Yes               | Yes    | Yes    | Yes    | Yes    | Yes     | Yes           | 4 (Moderate) |
| Sartorao et al, Brazil         | Yes               | No     | No     | Yes    | Yes               | Yes    | Yes    | Yes    | Yes    | Yes     | Yes           | 2 (Low)      |
| Zhang et al, Brazil            | Yes               | No     | No     | No     | Yes               | No     | Yes    | Yes    | Yes    | Yes     | Yes           | 4 (Moderate) |
| Garcia-Priego et al, Mexico    | No                | No     | No     | No     | Yes               | Yes    | Yes    | Yes    | Yes    | Yes     | Yes           | 4 (Moderate) |
| Bryan et al, U.S.              | Yes               | Yes    | Yes    | No     | Yes               | Yes    | Yes    | Yes    | Yes    | Yes     | Yes           | 1 (Low)      |
| Kantor et al, U.S.             | Yes               | Yes    | Yes    | Yes    | Yes               | No     | Yes    | Yes    | Yes    | Yes     | Yes           | 1 (Low)      |
| Killgore et al, U.S.           | Yes               | Yes    | No     | No     | Yes               | No     | Yes    | Yes    | Yes    | Yes     | Yes           | 3 (Low)      |
| Lan et al, U.S.                | No                | No     | No     | Yes    | Yes               | Yes    | Yes    | Yes    | Yes    | Yes     | Yes           | 3 (Low)      |
| Lee et al, U.S.                | No                | Yes    | No     | No     | Yes               | No     | Yes    | Yes    | Yes    | Yes     | Yes           | 4 (Moderate) |
| Liu et al, U.S.                | No                | No     | No     | No     | Yes               | Yes    | Yes    | Yes    | Yes    | Yes     | Yes           | 4 (Moderate) |
| Rosenberg et al, U.S.          | Yes               | No     | Yes    | No     | Yes               | Yes    | Yes    | Yes    | Yes    | Yes     | Yes           | 2 (Low)      |
| <b>South-East Asia Region</b>  |                   |        |        |        |                   |        |        |        |        |         |               |              |
| Banna et al, Bangladesh        | Yes               | Yes    | No     | No     | Yes               | No     | Yes    | Yes    | Yes    | Yes     | Yes           | 3 (Low)      |
| Islam et al, Bangladesh        | No                | Yes    | No     | Yes    | Yes               | Yes    | Yes    | Yes    | Yes    | Yes     | Yes           | 2 (Low)      |
| Khan et al, Bangladesh         | No                | No     | No     | No     | Yes               | Yes    | Yes    | Yes    | Yes    | Yes     | Yes           | 4 (Moderate) |
| Ahmad et al, India             | Yes               | No     | No     | Yes    | Yes               | Yes    | Yes    | Yes    | Yes    | Yes     | Yes           | 2 (Low)      |
| Balhara et al, India           | No                | No     | No     | No     | Yes               | No     | Yes    | Yes    | Yes    | Yes     | Yes           | 5 (Moderate) |
| Saikarthik et al, India        | Yes               | No     | No     | Yes    | Yes               | Yes    | Yes    | Yes    | Yes    | Yes     | Yes           | 2 (Low)      |
| Vidyadhara et al, India        | No                | No     | No     | No     | Yes               | No     | Yes    | Yes    | Yes    | Yes     | Yes           | 5 (Moderate) |
| Varshney et al, India          | No                | No     | No     | No     | Yes               | Yes    | Yes    | Yes    | Yes    | Yes     | Yes           | 4 (Moderate) |
| Sigdel et al, Nepal            | Yes               | No     | No     | Yes    | Yes               | Yes    | Yes    | Yes    | Yes    | Yes     | Yes           | 2 (Low)      |
| Nochaiwong et al, Thailand     | Yes               | Yes    | No     | Yes    | Yes               | Yes    | Yes    | Yes    | Yes    | Yes     | Yes           | 1 (Low)      |
| <b>European Region</b>         |                   |        |        |        |                   |        |        |        |        |         |               |              |
| Rauschenberg et al, Germany    | No                | No     | Yes    | No     | Yes               | Yes    | Yes    | Yes    | Yes    | Yes     | Yes           | 3 (Low)      |
| Voitsidis et al, Greece        | Yes               | Yes    | No     | Yes    | Yes               | No     | Yes    | Yes    | Yes    | Yes     | Yes           | 2 (Low)      |
| Hyland et al, Ireland          | Yes               | Yes    | Yes    | No     | Yes               | Yes    | Yes    | Yes    | Yes    | Yes     | Yes           | 1 (Low)      |
| Cellini et al, Italy           | No                | Yes    | No     | No     | Yes               | Yes    | Yes    | Yes    | Yes    | Yes     | Yes           | 3 (Low)      |
| Costantini et al, Italy        | Yes               | No     | No     | No     | Yes               | No     | Yes    | Yes    | Yes    | Yes     | Yes           | 4 (Moderate) |
| Forte et al, Italy             | Yes               | Yes    | No     | Yes    | Yes               | Yes    | Yes    | Yes    | Yes    | Yes     | Yes           | 1 (Low)      |
| Mazza et al, Italy             | Yes               | Yes    | No     | Yes    | Yes               | Yes    | Yes    | Yes    | Yes    | Yes     | Yes           | 1 (Low)      |
| Moccia et al, Italy            | Yes               | No     | No     | No     | Yes               | Yes    | Yes    | Yes    | Yes    | Yes     | Yes           | 3 (Low)      |
| Rossi et al, Italy             | Yes               | Yes    | No     | No     | Yes               | Yes    | Yes    | Yes    | Yes    | Yes     | Yes           | 2 (Low)      |
| Ebrahimi et al, Norway         | Yes               | Yes    | Yes    | No     | Yes               | Yes    | Yes    | Yes    | Yes    | Yes     | Yes           | 1 (Low)      |
| Moreira et al, Portugal        | Yes               | Yes    | No     | No     | Yes               | Yes    | Yes    | Yes    | Yes    | Yes     | Yes           | 2 (Low)      |
| Gómez-Salgado et al, Spain     | Yes               | Yes    | No     | Yes    | Yes               | Yes    | Yes    | Yes    | Yes    | Yes     | Yes           | 1 (Low)      |
| González-Sanguino et al, Spain | Yes               | Yes    | No     | No     | Yes               | Yes    | Yes    | Yes    | Yes    | Yes     | Yes           | 2 (Low)      |
| Munoz-Navarro et al, Spain     | Yes               | No     | No     | No     | Yes               | No     | Yes    | Yes    | Yes    | Yes     | Yes           | 4 (Moderate) |
| Odrizola-González et al, Spain | No                | Yes    | No     | No     | Yes               | No     | Yes    | Yes    | Yes    | Yes     | Yes           | 4 (Moderate) |
| Ozamid-Etxebarria et al, Spain | No                | Yes    | No     | No     | Yes               | Yes    | Yes    | Yes    | Yes    | Yes     | Yes           | 3 (Low)      |
| Parrado-González et al, Spain  | Yes               | Yes    | No     | Yes    | Yes               | Yes    | Yes    | Yes    | Yes    | Yes     | Yes           | 1 (Low)      |
| Hakansson et al, Sweden        | Yes               | Yes    | No     | No     | Yes               | Yes    | Yes    | Yes    | Yes    | Yes     | Yes           | 2 (Low)      |
| Özdin et al, Turkey            | Yes               | No     | No     | No     | Yes               | Yes    | Yes    | Yes    | Yes    | Yes     | Yes           | 3 (Low)      |
| Seyahi et al, Turkey           | No                | No     | No     | No     | Yes               | Yes    | Yes    | Yes    | Yes    | Yes     | Yes           | 4 (Moderate) |
| Fancourt et al, UK             | Yes               | Yes    | No     | No     | Yes               | Yes    | Yes    | Yes    | Yes    | Yes     | Yes           | 2 (Low)      |

<sup>†</sup>Based on the risk of bias in prevalence studies by Hoy et al. J Clin Epidemiol. 2012;65(9):934-9.

Abbreviations: RoB, risk of bias; U.S., United states.

**Table S5** Risk of Bias Assessment of Included Studies (Continued)<sup>†</sup>

| Author, Country                     | External validity |        |        |        | Internal validity |        |        |        |        |         | RoB (Overall) |              |
|-------------------------------------|-------------------|--------|--------|--------|-------------------|--------|--------|--------|--------|---------|---------------|--------------|
|                                     | Hoy Q1            | Hoy Q2 | Hoy Q3 | Hoy Q4 | Hoy Q5            | Hoy Q6 | Hoy Q7 | Hoy Q8 | Hoy Q9 | Hoy Q10 |               |              |
| <b>European Region (Continued)</b>  |                   |        |        |        |                   |        |        |        |        |         |               |              |
| Jia et al, UK                       | Yes               | Yes    | No     | Yes    | Yes               | Yes    | Yes    | Yes    | Yes    | Yes     | Yes           | 1 (Low)      |
| Kwong et al, UK                     | Yes               | Yes    | No     | No     | Yes               | Yes    | Yes    | No     | Yes    | Yes     | Yes           | 3 (Low)      |
| Levita et al, UK                    | No                | Yes    | No     | No     | Yes               | No     | Yes    | Yes    | Yes    | Yes     | Yes           | 4 (Moderate) |
| Li et al, UK                        | Yes               | No     | No     | No     | Yes               | No     | Yes    | No     | Yes    | Yes     | Yes           | 5 (Moderate) |
| Shevlin et al, UK                   | Yes               | Yes    | Yes    | No     | Yes               | Yes    | Yes    | Yes    | Yes    | Yes     | Yes           | 1 (Low)      |
| Smith et al, UK                     | Yes               | Yes    | Yes    | Yes    | Yes               | Yes    | Yes    | Yes    | Yes    | Yes     | Yes           | 0 (Low)      |
| <b>Eastern Mediterranean Region</b> |                   |        |        |        |                   |        |        |        |        |         |               |              |
| El-Zoghby et al, Egypt              | Yes               | No     | No     | No     | Yes               | Yes    | Yes    | Yes    | Yes    | Yes     | Yes           | 3 (Low)      |
| Afshar Jahanshahi et al, Iran       | Yes               | Yes    | No     | No     | Yes               | No     | Yes    | Yes    | Yes    | Yes     | Yes           | 3 (Low)      |
| Chen et al, Iran                    | No                | No     | No     | No     | Yes               | Yes    | Yes    | Yes    | Yes    | Yes     | Yes           | 4 (Moderate) |
| Moghanibashi-Mansourieh et al, Iran | Yes               | Yes    | No     | Yes    | Yes               | No     | Yes    | Yes    | Yes    | Yes     | Yes           | 2 (Low)      |
| Al-Tammemi et al, Jordan            | No                | No     | No     | No     | Yes               | Yes    | Yes    | Yes    | Yes    | Yes     | Yes           | 4 (Moderate) |
| Naser et al, Jordan                 | Yes               | Yes    | No     | No     | Yes               | Yes    | Yes    | Yes    | Yes    | Yes     | Yes           | 2 (Low)      |
| Salman et al, Pakistan              | No                | Yes    | No     | No     | Yes               | Yes    | Yes    | Yes    | Yes    | Yes     | Yes           | 3 (Low)      |
| Alyami et al, Saudi Arabia          | Yes               | Yes    | No     | No     | Yes               | Yes    | Yes    | Yes    | Yes    | Yes     | Yes           | 2 (Low)      |
| Joseph et al, Saudi Arabia          | Yes               | No     | No     | No     | Yes               | Yes    | Yes    | Yes    | Yes    | Yes     | Yes           | 3 (Low)      |
| Fekih-Romdhane et al, Tunisia       | Yes               | No     | No     | No     | Yes               | No     | Yes    | Yes    | Yes    | Yes     | Yes           | 4 (Moderate) |
| Saddik et al, UAE                   | Yes               | Yes    | No     | No     | Yes               | Yes    | Yes    | Yes    | Yes    | Yes     | Yes           | 2 (Low)      |
| Saddik et al, UAE                   | No                | Yes    | No     | Yes    | Yes               | Yes    | Yes    | Yes    | Yes    | Yes     | Yes           | 2 (Low)      |
| <b>Western Pacific Region</b>       |                   |        |        |        |                   |        |        |        |        |         |               |              |
| Collie et al, Australia             | No                | No     | No     | No     | Yes               | Yes    | Yes    | Yes    | Yes    | Yes     | Yes           | 4 (Moderate) |
| Newby et al, Australia              | Yes               | Yes    | No     | Yes    | Yes               | Yes    | Yes    | Yes    | Yes    | Yes     | Yes           | 1 (Low)      |
| Phillipou et al, Australia          | Yes               | Yes    | No     | No     | Yes               | Yes    | Yes    | Yes    | Yes    | Yes     | Yes           | 2 (Low)      |
| Stanton et al, Australia            | Yes               | Yes    | No     | No     | Yes               | Yes    | Yes    | Yes    | Yes    | Yes     | Yes           | 2 (Low)      |
| Ahmed et al, China                  | Yes               | Yes    | No     | No     | Yes               | Yes    | Yes    | Yes    | Yes    | Yes     | Yes           | 2 (Low)      |
| Cao et al, China                    | No                | Yes    | No     | Yes    | Yes               | Yes    | Yes    | Yes    | Yes    | Yes     | Yes           | 2 (Low)      |
| Chang et al, China                  | No                | Yes    | No     | Yes    | Yes               | Yes    | Yes    | Yes    | Yes    | Yes     | Yes           | 2 (Low)      |
| Chen et al, China                   | Yes               | Yes    | No     | No     | Yes               | Yes    | Yes    | Yes    | Yes    | Yes     | Yes           | 2 (Low)      |
| Elhai et al, China                  | No                | No     | No     | No     | Yes               | No     | Yes    | Yes    | Yes    | Yes     | Yes           | 5 (Moderate) |
| Gao et al, China                    | Yes               | Yes    | No     | Yes    | Yes               | Yes    | Yes    | Yes    | Yes    | Yes     | Yes           | 1 (Low)      |
| Guo et al, China                    | Yes               | Yes    | Yes    | No     | Yes               | Yes    | Yes    | Yes    | Yes    | Yes     | Yes           | 1 (Low)      |
| Huang et al, China                  | Yes               | Yes    | No     | No     | Yes               | Yes    | Yes    | Yes    | Yes    | Yes     | Yes           | 2 (Low)      |
| Lei et al, China                    | Yes               | Yes    | No     | Yes    | Yes               | Yes    | Yes    | Yes    | Yes    | Yes     | Yes           | 1 (Low)      |
| Li et al, China                     | Yes               | Yes    | No     | No     | Yes               | No     | Yes    | Yes    | Yes    | Yes     | Yes           | 3 (Low)      |
| Li et al, China                     | No                | Yes    | No     | No     | Yes               | No     | Yes    | Yes    | Yes    | Yes     | Yes           | 4 (Moderate) |
| Liang et al, China                  | No                | No     | No     | Yes    | Yes               | Yes    | Yes    | Yes    | Yes    | Yes     | No            | 4 (Moderate) |
| Liu et al, China                    | No                | No     | No     | No     | Yes               | No     | Yes    | Yes    | Yes    | Yes     | Yes           | 5 (Moderate) |
| Liu et al, China                    | Yes               | No     | No     | No     | Yes               | No     | Yes    | Yes    | Yes    | Yes     | Yes           | 4 (Moderate) |
| Ni et al, China                     | Yes               | Yes    | No     | No     | Yes               | Yes    | Yes    | Yes    | Yes    | Yes     | Yes           | 2 (Low)      |
| Qiu et al, China <sup>‡</sup>       | Yes               | Yes    | No     | No     | Yes               | No     | Yes    | Yes    | Yes    | Yes     | Yes           | 3 (Low)      |
| Ren et al, China                    | Yes               | Yes    | No     | No     | Yes               | No     | Yes    | Yes    | Yes    | Yes     | Yes           | 3 (Low)      |
| Shi et al, China                    | Yes               | Yes    | No     | Yes    | Yes               | Yes    | Yes    | Yes    | Yes    | Yes     | Yes           | 1 (Low)      |
| Sun et al, China                    | Yes               | Yes    | No     | No     | Yes               | No     | Yes    | Yes    | Yes    | Yes     | Yes           | 3 (Low)      |
| Sun et al, China                    | No                | Yes    | No     | No     | Yes               | Yes    | Yes    | Yes    | Yes    | Yes     | Yes           | 3 (Low)      |
| Tan et al, China                    | No                | No     | No     | No     | Yes               | Yes    | Yes    | Yes    | Yes    | Yes     | Yes           | 4 (Moderate) |
| Tang et al, China                   | Yes               | Yes    | No     | Yes    | Yes               | No     | Yes    | Yes    | Yes    | Yes     | Yes           | 2 (Low)      |

<sup>†</sup>Based on the risk of bias in prevalence studies by Hoy et al. J Clin Epidemiol. 2012;65(9):934-9.

<sup>‡</sup>Includes mainland China, Hong Kong, Macau, and Taiwan.

Abbreviations: RoB, risk of bias; UAE, United Arab Emirates; UK, United Kingdom.

**Table S5 Risk of Bias Assessment of Included Studies (Continued)<sup>†</sup>**

| Author, Country                           | External validity |        |        |        | Internal validity |        |        |        |        |         | RoB (Overall) |
|-------------------------------------------|-------------------|--------|--------|--------|-------------------|--------|--------|--------|--------|---------|---------------|
|                                           | Hoy Q1            | Hoy Q2 | Hoy Q3 | Hoy Q4 | Hoy Q5            | Hoy Q6 | Hoy Q7 | Hoy Q8 | Hoy Q9 | Hoy Q10 |               |
| <b>Western Pacific Region (Continued)</b> |                   |        |        |        |                   |        |        |        |        |         |               |
| Tang et al, China                         | No                | Yes    | No     | No     | Yes               | No     | Yes    | Yes    | Yes    | Yes     | 4 (Moderate)  |
| Tian et al, China                         | Yes               | Yes    | No     | Yes    | Yes               | No     | Yes    | Yes    | Yes    | Yes     | 2 (Low)       |
| Wang et al, China                         | Yes               | Yes    | No     | Yes    | Yes               | No     | Yes    | Yes    | Yes    | Yes     | 2 (Low)       |
| Wang et al, China                         | Yes               | No     | No     | Yes    | Yes               | Yes    | Yes    | Yes    | Yes    | Yes     | 2 (Low)       |
| Ying et al, China                         | No                | No     | No     | Yes    | Yes               | Yes    | Yes    | Yes    | Yes    | Yes     | 3 (Low)       |
| Zhang et al, China                        | Yes               | Yes    | No     | No     | Yes               | Yes    | Yes    | Yes    | Yes    | Yes     | 2 (Low)       |
| Zhang et al, China                        | Yes               | No     | No     | No     | Yes               | Yes    | Yes    | Yes    | Yes    | Yes     | 3 (Low)       |
| Zhang et al, China                        | No                | No     | No     | No     | Yes               | No     | Yes    | Yes    | Yes    | Yes     | 5 (Moderate)  |
| Zhao et al, China                         | Yes               | Yes    | No     | No     | Yes               | Yes    | Yes    | Yes    | Yes    | Yes     | 2 (Low)       |
| Zhao et al, China                         | No                | No     | No     | No     | Yes               | No     | Yes    | Yes    | Yes    | Yes     | 5 (Moderate)  |
| Zhou et al, China                         | No                | Yes    | No     | Yes    | Yes               | Yes    | Yes    | Yes    | Yes    | Yes     | 2 (Low)       |
| Zhu et al, China                          | Yes               | Yes    | No     | No     | Yes               | No     | Yes    | Yes    | Yes    | Yes     | 3 (Low)       |
| Choi et al, Hong Kong                     | Yes               | No     | No     | No     | Yes               | Yes    | Yes    | Yes    | Yes    | Yes     | 3 (Low)       |
| Tso et al, Hong Kong                      | Yes               | Yes    | No     | Yes    | Yes               | Yes    | Yes    | Yes    | Yes    | Yes     | 1 (Low)       |
| Ueda et al, Japan                         | Yes               | Yes    | No     | No     | Yes               | No     | Yes    | Yes    | Yes    | Yes     | 3 (Low)       |
| Dai et al, Malaysia                       | Yes               | No     | Yes    | No     | Yes               | No     | Yes    | Yes    | Yes    | Yes     | 3 (Low)       |
| Sibley et al, New Zealand                 | Yes               | No     | No     | No     | Yes               | No     | Yes    | No     | Yes    | Yes     | 5 (Moderate)  |
| Nguyen et al, Vietnam                     | No                | Yes    | No     | No     | Yes               | No     | Yes    | Yes    | Yes    | Yes     | 4 (Moderate)  |

<sup>†</sup>Based on the risk of bias in prevalence studies by Hoy et al. J Clin Epidemiol. 2012;65(9):934-9.

Abbreviations: RoB, risk of bias; UAE, United Arab Emirates; UK, United Kingdom; U.S., United states.

**Table S6** Summary of Primary Outcomes Prevalence Estimates Among the General Population Amid COVID-19 Pandemic, by Countries: Depression

| Country                             | No. of studies | Cases/Total    | Prevalence (95% CI) | I <sup>2</sup> (95% CI) | P value for heterogeneity |
|-------------------------------------|----------------|----------------|---------------------|-------------------------|---------------------------|
| <b>Africa region</b>                |                |                |                     |                         |                           |
| Nigeria                             | 1              | 118/502        | 23.5% (19.9-27.5)   | NA                      | NA                        |
| South Africa                        | 1              | 32/221         | 14.5% (10.1-19.8)   | NA                      | NA                        |
| <b>Region of the Americas</b>       |                |                |                     |                         |                           |
| Brazil                              | 2              | 443/700        | 63.3% (59.7-66.8)   | NA                      | NA                        |
| Mexico                              | 1              | 155/561        | 27.6% (24.0)        | NA                      | NA                        |
| United States                       | 7              | 3,830/15,887   | 27.6% (19.8-36.2)   | 98.8% (98.0-99.7)       | <0.001                    |
| <b>South-East Asia Region</b>       |                |                |                     |                         |                           |
| Bangladesh                          | 3              | 3,026/5,054    | 56.2% (48.6-63.7)   | NA                      | NA                        |
| India                               | 3              | 408/1,501      | 28.5% (13.3-46.7)   | NA                      | NA                        |
| Nepal                               | 1              | 119/349        | 34.1% (29.1-39.3)   | NA                      | NA                        |
| Thailand                            | 1              | 1,654/4,004    | 41.3% (39.8-42.8)   | NA                      | NA                        |
| <b>European Region</b>              |                |                |                     |                         |                           |
| Germany                             | NA             | NA             | NA                  | NA                      | NA                        |
| Greece                              | NA             | NA             | NA                  | NA                      | NA                        |
| Ireland                             | 1              | 237/1,041      | 22.8% (20.2-25.4)   | NA                      | NA                        |
| Italy                               | 3              | 4,320/22,223   | 24.4% (14.5-35.8)   | NA                      | NA                        |
| Norway                              | 1              | 3,104/10,084   | 30.8% (29.9-31.7)   | NA                      | NA                        |
| Portugal                            | 1              | 240/1,280      | 18.8% (16.6-21.0)   | NA                      | NA                        |
| Spain                               | 4              | 2,815/9,756    | 28.7% (16.6-42.7)   | 99.5% (99.1-99.7)       | <0.001                    |
| Sweden                              |                |                |                     |                         |                           |
| Turkey                              | 2              | 454/1,260      | 35.8% (33.2-38.5)   | NA                      | NA                        |
| United Kingdom                      | 7              | 22,680/80,711  | 25.4% (19.9-31.4)   | 99.6% (99.5-99.9)       | <0.001                    |
| <b>Eastern Mediterranean Region</b> |                |                |                     |                         |                           |
| Egypt                               |                |                |                     |                         |                           |
| Iran                                | 1              | 104/474        | 21.9% (18.3-25.9)   | NA                      | NA                        |
| Jordan                              | 1              | 1,292/2,963    | 43.6% (41.8-45.4)   | NA                      | NA                        |
| Pakistan                            | 1              | 510/1,134      | 45.0% (42.1-47.9)   | NA                      | NA                        |
| Saudi Arabia                        | 2              | 740/2,665      | 27.7% (26.0-29.4)   | NA                      | NA                        |
| Tunisia                             | NA             | NA             | NA                  | NA                      | NA                        |
| United Arab Emirates                | NA             | NA             | NA                  | NA                      | NA                        |
| <b>Western Pacific Region</b>       |                |                |                     |                         |                           |
| Australia                           | 3              | 4,558/11,851   | 35.6% (25.6-46.3)   | NA                      | NA                        |
| China                               | 25             | 18,100/103,505 | 22.3% (16.8-28.4)   | 99.7% (99.5-99.9)       | <0.001                    |
| Hong Kong                           | 2              | 291/881        | 32.2% (29.1-35.3)   | NA                      | NA                        |
| Japan                               | 1              | 347/2,000      | 17.4% (15.7-19.1)   | NA                      | NA                        |
| Malaysia                            | NA             | NA             | NA                  | NA                      | NA                        |
| New Zealand                         | NA             | NA             | NA                  | NA                      | NA                        |
| Vietnam                             | NA             | NA             | NA                  | NA                      | NA                        |

Abbreviations: CI, confidence interval; COVID-19, coronavirus disease-2019; NA, not applicable.

**Table S6** Summary of Primary Outcomes Prevalence Estimates Among the General Population Amid COVID-19 Pandemic, by Countries: Anxiety (Continued)

| Country                             | No. of studies | Cases/Total    | Prevalence (95% CI) | I <sup>2</sup> (95% CI) | P value for heterogeneity |
|-------------------------------------|----------------|----------------|---------------------|-------------------------|---------------------------|
| <b>Africa region</b>                |                |                |                     |                         |                           |
| Nigeria                             | 1              | 249/502        | 49.6% (45.2-54.0)   | NA                      | NA                        |
| South Africa                        | NA             | NA             | NA                  | NA                      | NA                        |
| <b>Region of the Americas</b>       |                |                |                     |                         |                           |
| Brazil                              | 2              | 343/700        | 49.0% (45.3-52.7)   | NA                      | NA                        |
| Mexico                              | 1              | 280/561        | 49.9% (45.7-54.1)   | NA                      | NA                        |
| United States                       | 4              | 1,141/3,239    | 33.2% (24.4-42.6)   | 96.4%<br>(93.1-98.5)    | <0.001                    |
| <b>South-East Asia Region</b>       |                |                |                     |                         |                           |
| Bangladesh                          | 3              | 2,634/5,054    | 43.4% (22.1-66.2)   | NA                      | NA                        |
| India                               | 4              | 580/1,893      | 28.5% (17.7-40.7)   | 96.5%<br>(94.1-98.3)    | <0.001                    |
| Nepal                               | 1              | 109/349        | 31.2% (26.4-36.4)   | NA                      | NA                        |
| Thailand                            | 1              | 903/4,004      | 22.6% (21.3-23.9)   | NA                      | NA                        |
| <b>European Region</b>              |                |                |                     |                         |                           |
| Germany                             | NA             | NA             | NA                  | NA                      | NA                        |
| Greece                              | NA             | NA             | NA                  | NA                      | NA                        |
| Ireland                             | 1              | 208/1,041      | 20.0% (17.6-22.5)   | NA                      | NA                        |
| Italy                               | 3              | 4,675/22,223   | 23.6% (18.0-29.7)   | NA                      | NA                        |
| Norway                              | 1              | 2,780/10,084   | 27.6% (26.7-28.4)   | NA                      | NA                        |
| Portugal                            | 1              | 204/1,280      | 15.9% (14.0-18.1)   | NA                      | NA                        |
| Spain                               | 4              | 2,543/9,756    | 25.9% (19.7-32.7)   | 98.2%<br>(97.0-99.2)    | <0.001                    |
| Sweden                              | NA             | NA             | NA                  | NA                      | NA                        |
| Turkey                              | 2              | 357/1,260      | 27.9% (25.4-30.4)   | NA                      | NA                        |
| United Kingdom                      | 6              | 18,368/73,170  | 28.4% (22.8-34.4)   | 99.4%<br>(99.1-99.7)    |                           |
| <b>Eastern Mediterranean Region</b> |                |                |                     |                         |                           |
| Egypt                               | NA             | NA             | NA                  | NA                      | NA                        |
| Iran                                | 2              | 5,572/11,228   | 49.6% (48.6-50.5)   | NA                      | NA                        |
| Jordan                              | 1              | 944/2,963      | 31.9% (30.2-33.6)   | NA                      | NA                        |
| Pakistan                            | 1              | 385/1,134      | 34.0% (31.2-36.8)   | NA                      | NA                        |
| Saudi Arabia                        | 2              | 656/2,665      | 24.5% (22.9-26.2)   | NA                      | NA                        |
| Tunisia                             | NA             | NA             | NA                  | NA                      | NA                        |
| United Arab Emirates                | 2              | 978/2,854      | 33.2% (31.5-35.0)   | NA                      | NA                        |
| <b>Western Pacific Region</b>       |                |                |                     |                         |                           |
| Australia                           | 3              | 3,952/11,851   | 27.9% (16.0-41.6)   | NA                      | NA                        |
| China                               | 25             | 18,159/108,698 | 22.2% (17.2-27.7)   | 99.7%<br>(99.5-99.9)    | <0.001                    |
| Hong Kong                           | 2              | 177/881        | 19.6% (17.1-22.3)   | NA                      | NA                        |
| Japan                               | 1              | 218/2,000      | 10.9% (9.6-12.4)    | NA                      | NA                        |
| Malaysia                            | NA             | NA             | NA                  | NA                      | NA                        |
| New Zealand                         | NA             | NA             | NA                  | NA                      | NA                        |
| Vietnam                             | 1              | 416/5,423      | 7.7% (7.0-8.4)      | NA                      | NA                        |

Abbreviations: CI, confidence interval; COVID-19, coronavirus disease-2019; NA, not applicable.

**Table S6** Summary of Primary Outcomes Prevalence Estimates Among the General Population Amid COVID-19 Pandemic, by Countries: Post-Traumatic Stress Symptoms (Continued)

| Country                             | No. of studies | Cases/Total  | Prevalence (95% CI) | <i>I</i> <sup>2</sup> (95% CI) | <i>P</i> value for heterogeneity |
|-------------------------------------|----------------|--------------|---------------------|--------------------------------|----------------------------------|
| <b>Africa region</b>                |                |              |                     |                                |                                  |
| Nigeria                             | 1              | 215/502      | 42.8% (38.4-47.3)   | NA                             | NA                               |
| South Africa                        | NA             | NA           | NA                  | NA                             | NA                               |
| <b>Region of the Americas</b>       |                |              |                     |                                |                                  |
| Brazil                              | NA             | NA           | NA                  | NA                             | NA                               |
| Mexico                              | NA             | NA           | NA                  | NA                             | NA                               |
| United States                       | 1              | 286/898      | 31.8% (28.8-34.9)   | NA                             | NA                               |
| <b>South-East Asia Region</b>       |                |              |                     |                                |                                  |
| Bangladesh                          | NA             | NA           | NA                  | NA                             | NA                               |
| India                               | 1              | 119/653      | 18.2% (15.4-21.3)   | NA                             | NA                               |
| Nepal                               | NA             | NA           | NA                  | NA                             | NA                               |
| Thailand                            | NA             | NA           | NA                  | NA                             | NA                               |
| <b>European Region</b>              |                |              |                     |                                |                                  |
| Germany                             | NA             | NA           | NA                  | NA                             | NA                               |
| Greece                              | NA             | NA           | NA                  | NA                             | NA                               |
| Ireland                             | 1              | 184/1,041    | 17.7% (15.4-20.1)   | NA                             | NA                               |
| Italy                               | 3              | 7,339/20,762 | 25.6% (16.7-35.6)   | NA                             | NA                               |
| Norway                              | NA             | NA           | NA                  | NA                             | NA                               |
| Portugal                            | NA             | NA           | NA                  | NA                             | NA                               |
| Spain                               | 3              | 2,533/7,606  | 35.9% (14.3-61.0)   | NA                             | NA                               |
| Sweden                              | NA             | NA           | NA                  | NA                             | NA                               |
| Turkey                              | 1              | 232/917      | 25.3% (22.5-28.2)   | NA                             | NA                               |
| United Kingdom                      | 2              | 446/3,996    | 10.5% (9.5-11.4)    | NA                             | NA                               |
| <b>Eastern Mediterranean Region</b> |                |              |                     |                                |                                  |
| Egypt                               | 1              | 265/510      | 52.0% (47.5-56.4)   | NA                             | NA                               |
| Iran                                | NA             | NA           | NA                  | NA                             | NA                               |
| Jordan                              | NA             | NA           | NA                  | NA                             | NA                               |
| Pakistan                            | NA             | NA           | NA                  | NA                             | NA                               |
| Saudi Arabia                        | 1              | 277/534      | 51.9% (47.5-56.2)   | NA                             | NA                               |
| Tunisia                             | 1              | 199/603      | 33.0% (29.3-36.9)   | NA                             | NA                               |
| United Arab Emirates                | NA             | NA           | NA                  | NA                             | NA                               |
| <b>Western Pacific Region</b>       |                |              |                     |                                |                                  |
| Australia                           | NA             | NA           | NA                  | NA                             | NA                               |
| China                               | 12             | 4,447/18,425 | 18.0% (5.9-34.8)    | 99.8%<br>(99.6-100)            | <0.001                           |
| Hong Kong                           | NA             | NA           | NA                  | NA                             | NA                               |
| Japan                               | NA             | NA           | NA                  | NA                             | NA                               |
| Malaysia                            | NA             | NA           | NA                  | NA                             | NA                               |
| New Zealand                         | NA             | NA           | NA                  | NA                             | NA                               |
| Vietnam                             | NA             | NA           | NA                  | NA                             | NA                               |

Abbreviations: CI, confidence interval; COVID-19, coronavirus disease-2019; NA, not applicable.

**Table S6** Summary of Primary Outcomes Prevalence Estimates Among the General Population Amid COVID-19 Pandemic, by Countries: Stress (Continued)

| Country                             | No. of studies | Cases/Total   | Prevalence (95% CI) | <i>I</i> <sup>2</sup> (95% CI) | <i>P</i> value for heterogeneity |
|-------------------------------------|----------------|---------------|---------------------|--------------------------------|----------------------------------|
| <b>Africa region</b>                |                |               |                     |                                |                                  |
| Nigeria                             | NA             | NA            | NA                  | NA                             | NA                               |
| South Africa                        | NA             | NA            | NA                  | NA                             | NA                               |
| <b>Region of the Americas</b>       |                |               |                     |                                |                                  |
| Brazil                              | 1              | 237/360       | 65.8% (60.8-70.6)   | NA                             | NA                               |
| Mexico                              | NA             | NA            | NA                  | NA                             | NA                               |
| United States                       | NA             | NA            | NA                  | NA                             | NA                               |
| <b>South-East Asia Region</b>       |                |               |                     |                                |                                  |
| Bangladesh                          | 3              | 2,824/5,054   | 48.9% (34.6-63.3)   | NA                             | NA                               |
| India                               | 2              | 352/1,373     | 25.5% (23.2-27.8)   | NA                             | NA                               |
| Nepal                               | NA             | NA            | NA                  | NA                             | NA                               |
| Thailand                            | 1              | 2,916/4,004   | 72.8% (71.4-74.2)   | NA                             | NA                               |
| <b>European Region</b>              |                |               |                     |                                |                                  |
| Germany                             | NA             | NA            | NA                  | NA                             | NA                               |
| Greece                              | NA             | NA            | NA                  | NA                             | NA                               |
| Ireland                             | NA             | NA            | NA                  | NA                             | NA                               |
| Italy                               | 3              | 5,341/22,223  | 32.4% (19.7-46.7)   | NA                             | NA                               |
| Norway                              | NA             | NA            | NA                  | NA                             | NA                               |
| Portugal                            | 1              | 252/1,280     | 19.7% (17.5-22.0)   | NA                             | NA                               |
| Spain                               | 2              | 1,548/4,523   | 34.1% (32.7-35.4)   | NA                             | NA                               |
| Sweden                              | NA             | NA            | NA                  | NA                             | NA                               |
| Turkey                              | NA             | NA            | NA                  | NA                             | NA                               |
| United Kingdom                      | NA             | NA            | NA                  | NA                             | NA                               |
| <b>Eastern Mediterranean Region</b> |                |               |                     |                                |                                  |
| Egypt                               | NA             | NA            | NA                  | NA                             | NA                               |
| Iran                                | NA             | NA            | NA                  | NA                             | NA                               |
| Jordan                              | NA             | NA            | NA                  | NA                             | NA                               |
| Pakistan                            | NA             | NA            | NA                  | NA                             | NA                               |
| Saudi Arabia                        | NA             | NA            | NA                  | NA                             | NA                               |
| Tunisia                             | NA             | NA            | NA                  | NA                             | NA                               |
| United Arab Emirates                | NA             | NA            | NA                  | NA                             | NA                               |
| <b>Western Pacific Region</b>       |                |               |                     |                                |                                  |
| Australia                           | 3              | 3,704/11,851  | 27.9% (18.2-38.7)   | NA                             | NA                               |
| China                               | 5              | 15,043/59,800 | 28.9% (12.6-48.6)   | 99.7%<br>(99.5-99.9)           | <0.001                           |
| Hong Kong                           | 1              | 227/381       | 59.6% (54.5-64.6)   | NA                             | NA                               |
| Japan                               | NA             | NA            | NA                  | NA                             | NA                               |
| Malaysia                            | NA             | NA            | NA                  | NA                             | NA                               |
| New Zealand                         | NA             | NA            | NA                  | NA                             | NA                               |
| Vietnam                             | NA             | NA            | NA                  | NA                             | NA                               |

Abbreviations: CI, confidence interval; COVID-19, coronavirus disease-2019; NA, not applicable.



**Table S6** Summary of Primary Outcomes Prevalence Estimates Among the General Population Amid COVID-19 Pandemic, by Countries: Psychological Distress (Continued)

| Country                             | No. of studies | Cases/Total   | Prevalence (95% CI) | <i>I</i> <sup>2</sup> (95% CI) | <i>P</i> value for heterogeneity |
|-------------------------------------|----------------|---------------|---------------------|--------------------------------|----------------------------------|
| <b>Africa region</b>                |                |               |                     |                                |                                  |
| Nigeria                             | NA             | NA            | NA                  | NA                             | NA                               |
| South Africa                        | NA             | NA            | NA                  | NA                             | NA                               |
| <b>Region of the Americas</b>       |                |               |                     |                                |                                  |
| Brazil                              | 2              | 1,027/1,292   | 80.2% (78.0-82.3)   | NA                             | NA                               |
| Mexico                              | NA             | NA            | NA                  | NA                             | NA                               |
| United States                       | NA             | NA            | NA                  | NA                             | NA                               |
| <b>South-East Asia Region</b>       |                |               |                     |                                |                                  |
| Bangladesh                          | 1              | 350/505       | 69.3% (65.2-73.3)   | NA                             | NA                               |
| India                               | NA             | NA            | NA                  | NA                             | NA                               |
| Nepal                               | NA             | NA            | NA                  | NA                             | NA                               |
| Thailand                            | NA             | NA            | NA                  | NA                             | NA                               |
| <b>European Region</b>              |                |               |                     |                                |                                  |
| Germany                             | 1              | 379/666       | 56.9% (53.1-60.7)   | NA                             | NA                               |
| Greece                              | NA             | NA            | NA                  | NA                             | NA                               |
| Ireland                             | NA             | NA            | NA                  | NA                             | NA                               |
| Italy                               | 2              | 273/829       | 32.8% (29.6-36.0)   | NA                             | NA                               |
| Norway                              | NA             | NA            | NA                  | NA                             | NA                               |
| Portugal                            | NA             | NA            | NA                  | NA                             | NA                               |
| Spain                               | 2              | 3,788/5,776   | 65.9% (64.6-67.1)   | NA                             | NA                               |
| Sweden                              | 1              | 875/1,986     | 44.1% (41.9-46.3)   | NA                             | NA                               |
| Turkey                              | NA             | NA            | NA                  | NA                             | NA                               |
| United Kingdom                      | 1              | 4,479/12,074  | 37.1% (36.2-38.0)   | NA                             | NA                               |
| <b>Eastern Mediterranean Region</b> |                |               |                     |                                |                                  |
| Egypt                               | NA             | NA            | NA                  | NA                             | NA                               |
| Iran                                | 2              | 716/1,532     | 45.6% (43.1-48.1)   | NA                             | NA                               |
| Jordan                              | 1              | 354/381       | 92.9% (89.9-95.3)   | NA                             | NA                               |
| Pakistan                            | NA             | NA            | NA                  | NA                             | NA                               |
| Saudi Arabia                        | NA             | NA            | NA                  | NA                             | NA                               |
| Tunisia                             | NA             | NA            | NA                  | NA                             | NA                               |
| United Arab Emirates                | NA             | NA            | NA                  | NA                             | NA                               |
| <b>Western Pacific Region</b>       |                |               |                     |                                |                                  |
| Australia                           | 1              | 424/551       | 77.0% (73.2-80.4)   | NA                             | NA                               |
| China                               | 3              | 18,671/55,232 | 23.9% (12.6-37.4)   | NA                             | NA                               |
| Hong Kong                           | NA             | NA            | NA                  | NA                             | NA                               |
| Japan                               | NA             | NA            | NA                  | NA                             | NA                               |
| Malaysia                            | NA             | NA            | NA                  | NA                             | NA                               |
| New Zealand                         | 1              | 266/991       | 26.8% (24.1-29.7)   | NA                             | NA                               |
| Vietnam                             | NA             | NA            | NA                  | NA                             | NA                               |

Abbreviations: CI, confidence interval; COVID-19, coronavirus disease-2019; NA, not applicable.

**Table S6** Summary of Primary Outcomes Prevalence Estimates Among the General Population Amid COVID-19 Pandemic, by Countries: Sleep Problems (Continued)

| Country                             | No. of studies | Cases/Total   | Prevalence (95% CI) | <i>I</i> <sup>2</sup> (95% CI) | <i>P</i> value for heterogeneity |
|-------------------------------------|----------------|---------------|---------------------|--------------------------------|----------------------------------|
| <b>Africa region</b>                |                |               |                     |                                |                                  |
| Nigeria                             | 1              | 76/502        | 15.1% (12.1-18.4)   | NA                             | NA                               |
| South Africa                        | NA             | NA            | NA                  | NA                             | NA                               |
| <b>Region of the Americas</b>       |                |               |                     |                                |                                  |
| Brazil                              | NA             | NA            | NA                  | NA                             | NA                               |
| Mexico                              | NA             | NA            | NA                  | NA                             | NA                               |
| United States                       | NA             | NA            | NA                  | NA                             | NA                               |
| <b>South-East Asia Region</b>       |                |               |                     |                                |                                  |
| Bangladesh                          | NA             | NA            | NA                  | NA                             | NA                               |
| India                               | NA             | NA            | NA                  | NA                             | NA                               |
| Nepal                               | NA             | NA            | NA                  | NA                             | NA                               |
| Thailand                            | 1              | 2,157/4,004   | 53.9% (52.3-55.4)   | NA                             | NA                               |
| <b>European Region</b>              |                |               |                     |                                |                                  |
| Germany                             | NA             | NA            | NA                  | NA                             | NA                               |
| Greece                              | 1              | 888/2,363     | 37.6% (35.6-39.6)   | NA                             | NA                               |
| Ireland                             | NA             | NA            | NA                  | NA                             | NA                               |
| Italy                               | 2              | 1,992/19,457  | 9.2% (8.8-9.6)      | NA                             | NA                               |
| Norway                              | NA             | NA            | NA                  | NA                             | NA                               |
| Portugal                            | NA             | NA            | NA                  | NA                             | NA                               |
| Spain                               | NA             | NA            | NA                  | NA                             | NA                               |
| Sweden                              | NA             | NA            | NA                  | NA                             | NA                               |
| Turkey                              | NA             | NA            | NA                  | NA                             | NA                               |
| United Kingdom                      | NA             | NA            | NA                  | NA                             | NA                               |
| <b>Eastern Mediterranean Region</b> |                |               |                     |                                |                                  |
| Egypt                               | NA             | NA            | NA                  | NA                             | NA                               |
| Iran                                | NA             | NA            | NA                  | NA                             | NA                               |
| Jordan                              | NA             | NA            | NA                  | NA                             | NA                               |
| Pakistan                            | NA             | NA            | NA                  | NA                             | NA                               |
| Saudi Arabia                        | NA             | NA            | NA                  | NA                             | NA                               |
| Tunisia                             | NA             | NA            | NA                  | NA                             | NA                               |
| United Arab Emirates                | NA             | NA            | NA                  | NA                             | NA                               |
| <b>Western Pacific Region</b>       |                |               |                     |                                |                                  |
| Australia                           | NA             | NA            | NA                  | NA                             | NA                               |
| China                               | 9              | 20,264/72,539 | 24.2% (18.6-30.2)   | 99.3% (99.0-99.4)              | <0.001                           |
| Hong Kong                           | NA             | NA            | NA                  | NA                             | NA                               |
| Japan                               | NA             | NA            | NA                  | NA                             | NA                               |
| Malaysia                            | 1              | 260/669       | 25.6% (20.2-31.3)   | NA                             | NA                               |
| New Zealand                         | NA             | NA            | NA                  | NA                             | NA                               |
| Vietnam                             | NA             | NA            | NA                  | NA                             | NA                               |

Abbreviations: CI, confidence interval; COVID-19, coronavirus disease-2019; NA, not applicable.

**Table S7** Summary of Secondary Outcomes Prevalence Estimates Among the General Population Amid COVID-19 Pandemic

| <b>Outcomes</b>               | <b>No. of studies</b> | <b>Cases/Total</b> | <b>Prevalence (95% CI)</b> | <b><i>I</i><sup>2</sup> (95% CI)</b> | <b><i>P</i> value for heterogeneity</b> |
|-------------------------------|-----------------------|--------------------|----------------------------|--------------------------------------|-----------------------------------------|
| Suicide ideation              | 4                     | 2,179/17,554       | 16.4%<br>(4.8-33.1)        | 99.8%<br>(99.5-100)                  | <0.001                                  |
| Loneliness                    | 3                     | 1,533/2,921        | 53.8%<br>(42.4-63.2)       | 97.0%<br>(94.1-99.3)                 | <0.001                                  |
| Somatic symptoms              | 3                     | 3,400/7,230        | 30.7%<br>(2.1-73.3)        | 99.9%<br>(99.7-100)                  | <0.001                                  |
| Low wellbeing                 | 3                     | 3,481/15,737       | 28.6%<br>(9.2-53.6)        | 99.9%<br>(99.7-100)                  | <0.001                                  |
| Alcohol drinking problems     | 2                     | 3,103/6,145        | 50.5%<br>(49.2-51.7)       | NA                                   | NA                                      |
| Obsessive compulsive symptoms | 2                     | 187/2,535          | 6.4%<br>(5.5-7.4)          | NA                                   | NA                                      |
| Panic disorder                | 1                     | 451/1,753          | 25.7%<br>(23.7-27.8)       | NA                                   | NA                                      |
| Phobia anxiety                | 1                     | 30/1,255           | 2.4%<br>(1.6-3.4)          | NA                                   | NA                                      |
| Adjustment disorder           | 1                     | 4,129/18,147       | 22.8%<br>(22.1-23.4)       | NA                                   | NA                                      |
| Suicide attempts              | 1                     | 128/10,625         | 1.2%<br>(1.0-1.4)          | NA                                   | NA                                      |

Abbreviations: CI, confidence interval; COVID-19, coronavirus disease-2019; NA, not applicable.

**Table S8** Subgroup Analysis of Included Studies: Depression

| Subgroup comparison                                     | No. of studies | Cases/Total    | Prevalence (95% CI) | <i>I</i> <sup>2</sup> (95% CI) | <i>P</i> value for heterogeneity | <i>P</i> value for difference |
|---------------------------------------------------------|----------------|----------------|---------------------|--------------------------------|----------------------------------|-------------------------------|
| HDI groups, 2018 <sup>†</sup>                           |                |                |                     |                                |                                  |                               |
| Low                                                     | 1              | 118/502        | 23.5% (19.9-27.5)   | NA                             | NA                               | 0.020                         |
| Medium                                                  | 8              | 4,063/8,038    | 41.4% (30.0-53.4)   | 99.1% (98.9-99.3)              | <0.001                           |                               |
| High                                                    | 32             | 21,780/112,428 | 25.6% (20.1-31.5)   | 99.7% (99.5-99.9)              | <0.001                           |                               |
| Very high                                               | 34             | 43,616/159,639 | 27.6% (24.6-30.5)   | 99.3% (99.1-99.4)              | <0.001                           |                               |
| GII, 2018 <sup>†</sup>                                  |                |                |                     |                                |                                  |                               |
| <0.439                                                  | 62             | 63,709/267,749 | 26.2% (23.1-29.3)   | 99.7% (99.5-99.9)              | <0.001                           | 0.020                         |
| ≥0.439                                                  | 10             | 5,459/11,475   | 39.6% (30.3-49.3)   | 99.0% (98.8-99.2)              | <0.001                           |                               |
| CSI during the survey <sup>‡</sup>                      |                |                |                     |                                |                                  |                               |
| Less stringent (<75)                                    | 15             | 6,212/26,417   | 28.2 (23.4-33.2)    | 98.5% (97.7-99.2)              | <0.001                           | 0.410                         |
| Moderate stringent (75-85)                              | 42             | 50,597/211,872 | 25.3 (21.4-29.5)    | 99.7% (99.5-99.9)              | <0.001                           |                               |
| Very stringent (>85)                                    | 17             | 12,369/41,244  | 34.5% (26.2-43.2)   | 99.6% (99.5-99.8)              | <0.001                           |                               |
| Hospital beds per 10,000 people, 2010-2018 <sup>§</sup> |                |                |                     |                                |                                  |                               |
| Low                                                     | 8              | 4,063/8,038    | 41.4% (30.0-53.4)   | 99.1% (98.7-99.4)              |                                  | <0.001                        |
| Medium-low                                              | 3              | 1,551/3,998    | 30.8% (17.7-45.8)   | NA                             | NA                               |                               |
| Medium                                                  | 15             | 26,208/90,381  | 31.7% (27.1-36.4)   | 99.3% (99.2-99.4)              | <0.001                           |                               |
| Medium-high                                             | 44             | 36,967/174,586 | 27.8% (20.9-28.9)   | 99.7% (99.5-99.9)              | <0.001                           |                               |
| High                                                    | 1              | 347/2,000      | 17.4% (15.7-19.1)   | NA                             | NA                               |                               |
| No data                                                 | 4              | 441/1,604      | 26.2% (13.4-41.5)   | 97.7% (95.7-99.1)              | <0.001                           |                               |

<sup>†</sup>Based on the 2019 Human Development Report by the United Nations Development Programme.

<sup>‡</sup>Based on the Oxford COVID-19 Government Response Tracker—highest value during the surveys.

<sup>§</sup>Based on the 2020 global preparedness and vulnerability to respond to COVID-19 pandemic by the United Nations Development Programme.

Abbreviations: CI, confidence interval; CSI, Coronavirus Disease-2019 Government Response Stringency Index; GDP, gross domestic product; GII, Gender Inequality Index; HDI, Human Development Index; NA, not applicable.

**Table S8** Subgroup Analysis of Included Studies: Depression (Continued)

| Subgroup comparison                                                                             | No. of studies | Cases/Total    | Prevalence (95% CI) | <i>I</i> <sup>2</sup> (95% CI) | <i>P</i> value for heterogeneity | <i>P</i> value for difference |
|-------------------------------------------------------------------------------------------------|----------------|----------------|---------------------|--------------------------------|----------------------------------|-------------------------------|
| Current health expenditure (% of GDP), 2016 <sup>§</sup>                                        |                |                |                     |                                |                                  |                               |
| Low                                                                                             | 9              | 5,716/12,195   | 40.2% (30.4-50.3)   | 99.1% (98.8-99.3)              | <0.001                           | 0.020                         |
| Medium-low                                                                                      | 29             | 20,001/108,289 | 23.8% (18.4-29.7)   | 99.7% (99.5-99.9)              | <0.001                           |                               |
| Medium                                                                                          | 3              | 859/3,014      | 28.2% (22.4-34.4)   | NA                             | NA                               |                               |
| Medium-high                                                                                     | 10             | 7,508/33,715   | 24.7% (18.6-31.3)   | 99.3% (99.1-99.4)              | <0.001                           |                               |
| High                                                                                            | 22             | 35,202/122,513 | 30.1% (26.5-33.9)   | 99.3% (99.0-99.4)              | <0.001                           |                               |
| Real GDP growth 2020, estimates percent change <sup>¥</sup>                                     |                |                |                     |                                |                                  |                               |
| Below -3.0                                                                                      | 40             | 46,674/166,399 | 29.4% (26.4-32.4)   | 99.3% (99.2-99.4)              | <0.001                           | 0.410                         |
| Above -3.0                                                                                      | 35             | 22,903/114,208 | 26.5% (20.8-32.7)   | 99.6% (99.5-99.8)              | <0.001                           |                               |
| Resilience of a country's business environment <sup>£</sup>                                     |                |                |                     |                                |                                  |                               |
| First quartile                                                                                  | 30             | 42,422/155,714 | 27.4% (24.3-30.6)   | 99.3% (99.2-99.4)              | <0.001                           | 0.030                         |
| Second quartile                                                                                 | 11             | 2,332/6,908    | 33.1% (25.0-41.6%)  | 98.1% (97.1-99.2)              | <0.001                           |                               |
| Third quartile                                                                                  | 27             | 21,046/110,472 | 23.7% (18.0-29.9)   | 99.8% (99.6-100)               | <0.001                           |                               |
| Fourth quartile                                                                                 | 7              | 3,877/7,513    | 41.4% (29.7-53.6)   | 99.0% (98.7-99.3)              | <0.001                           |                               |
| Immediate economic vulnerability: inbound tourism expenditure (% of GDP 2016-2018) <sup>§</sup> |                |                |                     |                                |                                  |                               |
| Low                                                                                             | 37             | 23,056/114,870 | 27.7% (22.0-33.8)   | 99.7% (99.5-99.9)              | <0.001                           | 0.760                         |
| Medium-low                                                                                      | 18             | 30,509/109,908 | 26.9% (23.6-30.3)   | 99.2% (98.9-99.4)              | <0.001                           |                               |
| Medium                                                                                          | 9              | 9,266/35,685   | 27.6% (19.6-36.5)   | 99.6% (99.5-99.8)              | <0.001                           |                               |
| Medium-high                                                                                     | 6              | 3,269/11,016   | 29.8% (19.9-40.7)   | 99.3% (99.0-99.4)              | <0.001                           |                               |
| High                                                                                            | 5              | 3,477/9,128    | 34.1% (23.9-45.0)   | 99.0 (98.7-99.3)               | <0.001                           |                               |
| Article type                                                                                    |                |                |                     |                                |                                  |                               |
| Published article                                                                               | 32             | 23,381/115,711 | 25.8% (20.2-31.7)   | 99.7% (99.5-99.9)              | <0.001                           | 0.38                          |
| Preprint reporting data                                                                         | 37             | 42,966/152,604 | 30.2% (26.7-33.9)   | 99.5% (99.2-99.8)              | <0.001                           |                               |
| Short communication/letter to editor/correspondence                                             | 6              | 3,230/12,292   | 27.0% (20.6-33.8)   | 98.5% (97.9-99.3)              | <0.001                           |                               |

<sup>§</sup>Based on the 2020 global preparedness and vulnerability to respond to COVID-19 pandemic by the United Nations Development Programme.

<sup>¥</sup>Based on the World Economic Outlook, April 2020 by the International Monetary Fund.

<sup>£</sup>Based on the 2020 FM Global Resilience Index.

Abbreviations: CI, confidence interval; GDP, gross domestic product; NA, not applicable.

**Table S8** Subgroup Analysis of Included Studies: Depression (Continued)

| Subgroup comparison          | No. of studies | Cases/Total    | Prevalence (95% CI) | <i>I</i> <sup>2</sup> (95% CI) | <i>P</i> value for heterogeneity | <i>P</i> value for difference |
|------------------------------|----------------|----------------|---------------------|--------------------------------|----------------------------------|-------------------------------|
| Study design                 |                |                |                     |                                |                                  |                               |
| Cross-sectional study        | 66             | 46,444/200,446 | 27.9% (24.4-31.6)   | 99.7% (99.5-99.9)              | <0.001                           | 0.780                         |
| Longitudinal survey          | 9              | 23,133/80,161  | 28.9% (22.8-35.4)   | 99.6% (99.2-100)               | <0.001                           |                               |
| Country                      |                |                |                     |                                |                                  |                               |
| Mainland China               | 25             | 18,100/103,505 | 28.0% (25.0-31.2)   | 99.7% (99.5-100)               | <0.001                           | 0.100                         |
| Non-mainland China           | 50             | 51,477/177,102 | 31.1% (28.1-34.2)   | 99.3% (99.0-99.4)              | <0.001                           |                               |
| Sample size                  |                |                |                     |                                |                                  |                               |
| <1,000                       | 26             | 3,656/12,570   | 27.8% (22.2-33.7)   | 98.1% (97.7-98.4)              | <0.001                           | 0.430                         |
| 1,000-5,000                  | 39             | 25,892/82,549  | 29.4% (24.8-34.1)   | 99.6% (99.5-99.8)              | <0.001                           |                               |
| >5,000                       | 10             | 40,029/185,488 | 23.7% (17.2-31.0)   | 99.8% (99.6-100)               | <0.001                           |                               |
| % Female                     |                |                |                     |                                |                                  |                               |
| <50                          | 15             | 5,755/14,923   | 29.9% (21.2-39.4)   | 99.3% (99.0-99.4)              | <0.001                           | 0.010                         |
| 50-60                        | 21             | 18,062/111,230 | 23.3% (18.5-28.4)   | 99.7% (99.5-99.9)              | <0.001                           |                               |
| >60                          | 36             | 44,402/147,848 | 30.6% (27.2-34.1)   | 99.4% (99.2-99.5)              | <0.001                           |                               |
| Measurement tools            |                |                |                     |                                |                                  |                               |
| PHQ-9                        | 32             | 43,917/197,718 | 25.3% (21.4-29.4)   | 99.7% (99.5-99.9)              | <0.001                           | <0.001                        |
| DASS-21: subscale depression | 18             | 11,939/31,395  | 33.1% (26.4-40.2)   | 99.3% (99.1-99.4)              | <0.001                           |                               |
| PHQ-2                        | 6              | 1,799/9,474    | 18.8% (14.8-23.1)   | 96.0% (93.7-98.4)              | <0.001                           |                               |
| CES-D                        | 5              | 3,424/9,818    | 31.9% (11.6-56.7)   | 99.8% (99.6-100)               | <0.001                           |                               |
| HADS: subscale depression    | 4              | 1,293/3,792    | 31.7% (25.6-38.2)   | 93.6% (87.3-97.2)              | <0.001                           |                               |
| Zung-SDS                     | 4              | 655/3,316      | 28.0 (25.0-31.2)    | 96.1% (93.2-98.3)              | <0.001                           |                               |
| Others                       | 6              | 6,550/25,094   | 37.1% (24.6-50.5)   | 99.7% (99.5-99.9)              | <0.001                           |                               |

Abbreviations: CES-D, Center for Epidemiologic Studies Depression Scale; CI, confidence interval; DASS-21, Depression, Anxiety and Stress Scale-21; HADS, Hospital Anxiety and Depression Scale; NA, not applicable; PHQ-2, Patient Health Questionnaire-2; PHQ-9, Patient Health Questionnaire-9; Zung-SDS, Zung-Self-Rating Depression Scale.

**Table S9** Subgroup Analysis of Included Studies: Anxiety

| Subgroup comparison                                      | No. of studies | Cases/Total    | Prevalence (95% CI) | <i>I</i> <sup>2</sup> (95% CI) | <i>P</i> value for heterogeneity | <i>P</i> value for difference |
|----------------------------------------------------------|----------------|----------------|---------------------|--------------------------------|----------------------------------|-------------------------------|
| HDI groups, 2018 <sup>†</sup>                            |                |                |                     |                                |                                  |                               |
| Low                                                      | 1              | 249/502        | 49.6% (45.1-54.1)   | NA                             | NA                               | <0.001                        |
| Medium                                                   | 10             | 4,124/13,853   | 30.9% (16.1-48.2)   | 99.7% (99.5-99.9)              | <0.001                           |                               |
| High                                                     | 32             | 26,201/128,154 | 25.6% (20.1-31.6)   | 99.8% (99.6-100)               | <0.001                           |                               |
| Very high                                                | 32             | 36,257/142,304 | 26.4% (23.8-29.1)   | 99.1% (98.6-99.4)              | <0.001                           |                               |
| GII, 2018 <sup>†</sup>                                   |                |                |                     |                                |                                  |                               |
| <0.439                                                   | 60             | 56,181/260,809 | 25.4% (22.6-28.3)   | 99.6% (99.5-99.9)              | <0.001                           | 0.100                         |
| ≥0.439                                                   | 12             | 10,224/22,621  | 34.3% (26.7-42.3)   | 99.2% (99.0-99.4)              | <0.001                           |                               |
| CSI during the survey <sup>‡</sup>                       |                |                |                     |                                |                                  |                               |
| Less stringent (<75)                                     | 14             | 9,157/25,908   | 28.0% (19.6-37.1)   | 99.5% (99.1-99.7)              | <0.001                           | 0.720                         |
| Moderate stringent (75-85)                               | 40             | 43,107/202,381 | 25.7% (22.0-29.6)   | 99.7% (99.5-99.9)              | <0.001                           |                               |
| Very stringent (>85)                                     | 19             | 12,479/48,307  | 28.8% (22.2-35.8)   | 99.6% (99.5-99.8)              | <0.001                           |                               |
| Hospital beds per 10,000 people, 2010-2018 <sup>§</sup>  |                |                |                     |                                |                                  |                               |
| Low                                                      | 9              | 3,708/8,430    | 34.2% (23.4-46.0)   | 99.1% (98.7-99.3)              | <0.001                           | <0.001                        |
| Medium-low                                               | 6              | 7,774/17,606   | 36.2% (24.8-48.6)   | 99.5% (99.1-99.7)              | <0.001                           |                               |
| Medium                                                   | 15             | 21,251/88,263  | 27.8% (23.2-32.7)   | 99.3% (99.0-99.4)              | <0.001                           |                               |
| Medium-high                                              | 41             | 33,454/167,131 | 24.0% (20.4-27.9)   | 99.7% (99.5-99.9)              | <0.001                           |                               |
| High                                                     | 1              | 218/2,000      | 10.9% (9.6-12.4)    | NA                             | NA                               |                               |
| Current health expenditure (% of GDP), 2016 <sup>§</sup> |                |                |                     |                                |                                  |                               |
| Low                                                      | 12             | 5,729/15,441   | 34.4% (24.8-44.8)   | 99.4% (99.1-99.8)              | <0.001                           | 0.240                         |
| Medium-low                                               | 29             | 19,740/113,482 | 24.1% (19.2-29.4)   | 99.7% (99.5-99.9)              | <0.001                           |                               |
| Medium                                                   | 4              | 1,181/8,437    | 19.8% (8.5-34.5)    | 99.4% (99.2-99.6)              | <0.001                           |                               |
| Medium-high                                              | 10             | 12,998/44,248  | 24.4% (18.3-35.5)   | 99.7% (99.5-99.8)              | <0.001                           |                               |
| High                                                     | 18             | 27,006/102,324 | 29.4% (25.6-33.4)   | 99.3% (99.0-99.4)              | <0.001                           |                               |

<sup>†</sup>Based on the 2019 Human Development Report by the United Nations Development Programme.

<sup>‡</sup>Based on the Oxford COVID-19 Government Response Tracker—highest value during the surveys.

<sup>§</sup>Based on the 2020 global preparedness and vulnerability to respond to COVID-19 pandemic by the United Nations Development Programme.

Abbreviations: CI, confidence interval; CSI, Coronavirus Disease-2019 Government Response Stringency Index; GDP, gross domestic product; GII, Gender Inequality Index; HDI, Human Development Index; NA, not applicable.

**Table S9** Subgroup Analysis of Included Studies: Anxiety (Continued)

| Subgroup comparison                                                                             | No. of studies | Cases/Total    | Prevalence (95% CI) | <i>I</i> <sup>2</sup> (95% CI) | <i>P</i> value for heterogeneity | <i>P</i> value for difference |
|-------------------------------------------------------------------------------------------------|----------------|----------------|---------------------|--------------------------------|----------------------------------|-------------------------------|
| Real GDP growth 2020, estimates percent change <sup>¥</sup>                                     |                |                |                     |                                |                                  |                               |
| Below -3.0                                                                                      | 38             | 43,892/159,597 | 29.4% (26.2-32.6)   | 99.3% (99.1-99.4)              | <0.001                           | 0.110                         |
| Above -3.0                                                                                      | 37             | 22,939/125,216 | 24.5% (19.7-29.6)   | 99.7% (99.5-100)               | <0.001                           |                               |
| Resilience of a country's business environment <sup>£</sup>                                     |                |                |                     |                                |                                  |                               |
| First quartile                                                                                  | 28             | 35,244/138,379 | 26.3% (23.5-29.1)   | 99.2% (89.6-99.3)              | <0.001                           | <0.001                        |
| Second quartile                                                                                 | 11             | 2,216/7,079    | 33.4% (26.3-41.0)   | 97.6% (97.1-98.3)              | <0.001                           |                               |
| Third quartile                                                                                  | 28             | 20,422/121,088 | 21.9% (17.4-26.8)   | 99.7% (99.5-99.9)              | <0.001                           |                               |
| Fourth quartile                                                                                 | 8              | 8,949/18,267   | 39.5% (30.6-48.7)   | 99.1% (98.7-99.3)              | <0.001                           |                               |
| Immediate economic vulnerability: inbound tourism expenditure (% of GDP 2016-2018) <sup>§</sup> |                |                |                     |                                |                                  |                               |
| Low                                                                                             | 39             | 28,140/131,209 | 26.9% (21.3-32.8)   | 99.8% (99.6-100)               | <0.001                           | 0.200                         |
| Medium-low                                                                                      | 14             | 23,225/89,719  | 30.1% (26.5-33.9)   | 99.0% (98.6-99.3)              | <0.001                           |                               |
| Medium                                                                                          | 9              | 9,360/40,887   | 23.2% (16.2-31.2)   | 99.6% (99.5-99.9)              | <0.001                           |                               |
| Medium-high                                                                                     | 8              | 3,878/13,870   | 29.3% (22.2-36.9)   | 98.9% (98.5-99.2)              | <0.001                           |                               |
| High                                                                                            | 5              | 2,228/9,128    | 22.1% (16.1-28.8)   | 97.8% (97.0-99.3)              | <0.001                           |                               |
| Article type                                                                                    |                |                |                     |                                |                                  |                               |
| Published article                                                                               | 34             | 28,220/137,081 | 24.5% (19.2-30.2)   | 99.8% (99.5-99.9)              | <0.001                           | 0.110                         |
| Preprint reporting data                                                                         | 36             | 35,865/136,453 | 29.7% (26.4-33.2)   | 99.3% (99.0-99.4)              | <0.001                           |                               |
| Short communication/letter to editor/correspondence                                             | 5              | 2,746/11,279   | 23.8% (18.1-29.9)   | 98.1% (97.1-99.3)              | <0.001                           |                               |
| Study design                                                                                    |                |                |                     |                                |                                  |                               |
| Cross-sectional study                                                                           | 68             | 48,608/212,400 | 26.2% (22.8-29.8)   | 99.7% (99.5-99.9)              | <0.001                           | 0.040                         |
| Longitudinal survey                                                                             | 7              | 18,223/72,413  | 33.7% (27.5-40.2)   | 99.4% (99.1-99.7)              | <0.001                           |                               |
| Country                                                                                         |                |                |                     |                                |                                  |                               |
| Mainland China                                                                                  | 25             | 18,159/108,698 | 22.2% (17.2-27.7)   | 99.7% (99.5-99.9)              | <0.001                           | 0.030                         |
| Non-mainland China                                                                              | 50             | 48,672/176,115 | 29.4% (26.2-32.7)   | 99.5% (99.1-99.8)              | <0.001                           |                               |

<sup>¥</sup>Based on the World Economic Outlook, April 2020 by the International Monetary Fund.

<sup>£</sup>Based on the 2020 FM Global Resilience Index.

Abbreviations: CI, confidence interval; GDP, gross domestic product; NA, not applicable.



**Table S9** Subgroup Analysis of Included Studies: Anxiety (Continued)

| Subgroup comparison       | No. of studies | Cases/Total    | Prevalence (95% CI) | <i>I</i> <sup>2</sup> (95% CI) | <i>P</i> value for heterogeneity | <i>P</i> value for difference |
|---------------------------|----------------|----------------|---------------------|--------------------------------|----------------------------------|-------------------------------|
| Sample size               |                |                |                     |                                |                                  |                               |
| <1,000                    | 26             | 3,431/12,702   | 26.8% (20.9-33.1)   | 98.4% (98.0-99.2)              | <0.001                           | 0.610                         |
| 1,000-5,000               | 38             | 23,196/81,455  | 28.0% (23.8-32.3)   | 99.5% (99.0-99.8)              | <0.001                           |                               |
| >5,000                    | 11             | 40,204/190,656 | 23.7% (16.9-31.3)   | 99.9% (99.6-100)               | <0.001                           |                               |
| % Female                  |                |                |                     |                                |                                  |                               |
| <50                       | 15             | 5,156/14,302   | 30.3% (21.8-39.6)   | 99.2% (98.8-99.4)              | <0.001                           | 0.130                         |
| 50-60                     | 18             | 13,523/94,997  | 20.8% (15.3-26.8)   | 99.7% (99.5-99.9)              | <0.001                           |                               |
| >60                       | 39             | 46,111/168,908 | 28.6% (25.5-31.8)   | 99.5% (99.2-99.8)              | <0.001                           |                               |
| Measurement tools         |                |                |                     |                                |                                  |                               |
| GAD-7                     | 41             | 45,960/225,609 | 24.7% (21.5-27.9)   | 99.6% (99.5-99.8)              | <0.001                           | <0.001                        |
| DASS-21: subscale anxiety | 18             | 15,708/41,241  | 31.5% (24.8-38.6)   | 99.5% (99.1-99.7)              | <0.001                           |                               |
| GAD-2                     | 6              | 2,597/9,460    | 27.7% (16.3-40.8)   | 99.4% (99.0-99.8)              | <0.001                           |                               |
| HADS: subscale anxiety    | 4              | 1,733/3,792    | 42.8% (26.0-60.4)   | 99.1% (98.8-99.4)              | <0.001                           |                               |
| Zung-SAS                  | 3              | 245/2,708      | 9.4% (5.8-13.6)     | NA                             | NA                               |                               |
| Others                    | 3              | 588/2,003      | 31.2% (15.3-49.8)   | NA                             | NA                               |                               |

Abbreviations: CI, confidence interval; DASS-21, Depression, Anxiety and Stress Scale-21; GAD-2, General Anxiety Disorder-2; GAD-7, General Anxiety Disorder-7; HADS, Hospital Anxiety and Depression Scale; NA, not applicable; Zung Self-Rating Anxiety Scale.

**Table S10** Subgroup Analysis of Included Studies: Post-Traumatic Stress Symptoms

| Subgroup comparison                                      | No. of studies | Cases/Total   | Prevalence (95% CI) | <i>I</i> <sup>2</sup> (95% CI) | <i>P</i> value for heterogeneity | <i>P</i> value for difference |
|----------------------------------------------------------|----------------|---------------|---------------------|--------------------------------|----------------------------------|-------------------------------|
| HDI groups, 2018 <sup>†</sup>                            |                |               |                     |                                |                                  |                               |
| Low                                                      | 1              | 215/502       | 42.8% (38.4-47.3)   | NA                             | NA                               | <0.001                        |
| Medium                                                   | 1              | 119/653       | 18.2% (15.3-21.4)   | NA                             | NA                               |                               |
| High                                                     | 14             | 4,911/19,538  | 21.1% (8.8-36.8)    | 99.8% (99.5-100)               | <0.001                           |                               |
| Very high                                                | 12             | 11,297/35,754 | 26.8% (19.0-35.4)   | 99.6% (99.5-99.9)              | <0.001                           |                               |
| GII, 2018 <sup>†</sup>                                   |                |               |                     |                                |                                  |                               |
| <0.439                                                   | 25             | 15,943/54,782 | 22.6% (15.3-31.0)   | 99.8% (99.6-100)               | <0.001                           | <0.001                        |
| ≥0.439                                                   | 2              | 384/1,163     | 31.9% (29.3-34.7)   | NA                             | NA                               |                               |
| CSI during the survey <sup>‡</sup>                       |                |               |                     |                                |                                  |                               |
| Less stringent (<75)                                     | 4              | 1,260/6,987   | 19.3% (13.5-25.8)   | 97.4% (95.1-98.3)              | <0.001                           | 0.030                         |
| Moderate stringent (75-85)                               | 15             | 5,181/21,741  | 21.0% (9.4-35.8)    | 99.8% (99.6-100)               | <0.001                           |                               |
| Very stringent (>85)                                     | 9              | 10,101/27,719 | 31.9% (25.1-39.0)   | 99.0% (98.6-99.2)              | <0.001                           |                               |
| Hospital beds per 10,000 people, 2010-2018 <sup>§</sup>  |                |               |                     |                                |                                  |                               |
| Low                                                      | 1              | 119/653       | 18.2% (15.3-21.4)   | NA                             | NA                               | <0.001                        |
| Medium-low                                               | 1              | 265/510       | 52.0% (47.5-56.4)   | NA                             | NA                               |                               |
| Medium                                                   | 6              | 1,338/7,091   | 23.4% (12.5-36.4)   | 99.3% (99.1-99.4)              | <0.001                           |                               |
| Medium-high                                              | 19             | 14,605/47,691 | 22.4% (13.8-32.4)   | 99.8% (99.5-100)               | <0.001                           |                               |
| High                                                     | NA             | NA            | NA                  | NA                             | NA                               |                               |
| Current health expenditure (% of GDP), 2016 <sup>§</sup> |                |               |                     |                                |                                  |                               |
| Low                                                      | 2              | 334/1,155     | 28.2% (25.6-30.8)   | NA                             | NA                               | <0.001                        |
| Medium-low                                               | 14             | 4,944/19,852  | 20.6% (8.6-36.1)    | 99.8% (99.5-100)               | <0.001                           |                               |
| Medium                                                   | 2              | 476/1,137     | 41.7% (38.9-44.6)   | NA                             | NA                               |                               |
| Medium-high                                              | 7              | 10,056/29,409 | 28.6% (19.8-38.2)   | 99.6% (99.3-99.8)              | <0.001                           |                               |
| High                                                     | 3              | 732/4,894     | 16.5% (5.0-32.8)    | NA                             | NA                               |                               |

<sup>†</sup>Based on the 2019 Human Development Report by the United Nations Development Programme.

<sup>‡</sup>Based on the Oxford COVID-19 Government Response Tracker—highest value during the surveys.

<sup>§</sup>Based on the 2020 global preparedness and vulnerability to respond to COVID-19 pandemic by the United Nations Development Programme.

Abbreviations: CI, confidence interval; CSI, Coronavirus Disease-2019 Government Response Stringency Index; GDP, gross domestic product; GII, Gender Inequality Index; HDI, Human Development Index; NA, not applicable.

**Table S10** Subgroup Analysis of Included Studies: Post-Traumatic Stress Symptoms (Continued)

| Subgroup comparison                                                                             | No. of studies | Cases/Total   | Prevalence (95% CI) | <i>I</i> <sup>2</sup> (95% CI) | <i>P</i> value for heterogeneity | <i>P</i> value for difference |
|-------------------------------------------------------------------------------------------------|----------------|---------------|---------------------|--------------------------------|----------------------------------|-------------------------------|
| Real GDP growth 2020, estimates percent change <sup>¥</sup>                                     |                |               |                     |                                |                                  |                               |
| Below -3.0                                                                                      | 13             | 11,434/36,325 | 26.6% (19.3-34.7)   | 99.6% (99.3-99.8)              | <0.001                           | 0.570                         |
| Above -3.0                                                                                      | 15             | 5,108/20,122  | 21.9% (9.8-37.2)    | 99.8% (99.5-100)               | <0.001                           |                               |
| Resilience of a country's business environment <sup>£</sup>                                     |                |               |                     |                                |                                  |                               |
| First quartile                                                                                  | 10             | 10,788/34,303 | 24.7% (16.3-34.1)   | 99.7% (99.5-99.9)              | <0.001                           | <0.001                        |
| Second quartile                                                                                 | 3              | 628/2,104     | 31.0% (14.6-50.3)   | NA                             | NA                               |                               |
| Third quartile                                                                                  | 14             | 4,911/19,538  | 21.1% (8.8-36.8)    | 99.8% (99.6-100)               | <0.001                           |                               |
| Fourth quartile                                                                                 | 1              | 215/502       | 42.8% (38.4-47.3)   | NA                             | NA                               |                               |
| Immediate economic vulnerability: inbound tourism expenditure (% of GDP 2016-2018) <sup>§</sup> |                |               |                     |                                |                                  |                               |
| Low                                                                                             | 14             | 4,781/19,580  | 19.6% (7.9-34.9)    | 99.8% (99.6-100)               | <0.001                           | 0.390                         |
| Medium-low                                                                                      | 4              | 1,009/5,428   | 24.2% (8.8-44.1)    | 99.6% (99.3-99.8)              | <0.001                           |                               |
| Medium                                                                                          | 4              | 7,523/21,803  | 23.4% (14.6-33.5)   | 99.1% (98.7-99.4)              | <0.001                           |                               |
| Medium-high                                                                                     | 6              | 3,229/9,636   | 36.1% (22.2-51.4)   | 99.5% (99.1-99.8)              | <0.001                           |                               |
| High                                                                                            | NA             | NA            | NA                  | NA                             | NA                               |                               |
| Article type                                                                                    |                |               |                     |                                |                                  |                               |
| Published article                                                                               | 15             | 6,689/17,890  | 28.2% (14.9-43.7)   | 99.8% (99.5-99.9)              | <0.001                           | 0.230                         |
| Preprint reporting data                                                                         | 8              | 8,222/28,223  | 22.0 (11.1-35.4)    | 99.8% (99.6-100)               | <0.001                           |                               |
| Short communication/letter to editor/correspondence                                             | 5              | 1,631/10,334  | 16.0% (10.8-22.0)   | 98.2% (97.1-99.4)              | <0.001                           |                               |
| Study design                                                                                    |                |               |                     |                                |                                  |                               |
| Cross-sectional study                                                                           | 25             | 15,939/51,009 | 26.0% (18.2-34.6)   | 99.8% (99.5-99.9)              | <0.001                           | 0.010                         |
| Longitudinal survey                                                                             | 3              | 606/5,438     | 10.6% (4.7-18.5)    | NA                             | NA                               |                               |
| Country                                                                                         |                |               |                     |                                |                                  |                               |
| Mainland China                                                                                  | 12             | 4,447/18,425  | 18.0% (5.9-34.8)    | 99.8% (99.6-100)               | <0.001                           | 0.220                         |
| Non-mainland China                                                                              | 16             | 12,095/38,022 | 29.0% (22.1-36.4%)  | 99.5% (99.3-99.7)              | <0.001                           |                               |

<sup>¥</sup>Based on the World Economic Outlook, April 2020 by the International Monetary Fund.

<sup>£</sup>Based on the 2020 FM Global Resilience Index.

Abbreviations: CI, confidence interval; GDP, gross domestic product; NA, not applicable.

**Table S10** Subgroup Analysis of Included Studies: Post-Traumatic Stress Symptoms (Continued)

| Subgroup comparison | No. of studies | Cases/Total   | Prevalence (95% CI) | <i>I</i> <sup>2</sup> (95% CI) | <i>P</i> value for heterogeneity | <i>P</i> value for difference |
|---------------------|----------------|---------------|---------------------|--------------------------------|----------------------------------|-------------------------------|
| Sample size         |                |               |                     |                                |                                  |                               |
| <1,000              | 12             | 1,843/6,981   | 23.9% (15.6-33.2)   | 98.7% (97.9-99.3)              | <0.001                           | <0.001                        |
| 1,000-5,000         | 15             | 8,033/31,319  | 23.4% (12.6-36.5)   | 99.8% (99.5-100)               | <0.001                           |                               |
| >5,000              | 1              | 6,666/18,147  | 36.7% (36.0-37.4)   | NA                             | NA                               |                               |
| % Female            |                |               |                     |                                |                                  |                               |
| <50                 | 5              | 868/3,403     | 26.9% (13.6-42.7)   | 99.0% (98.7-99.3)              | <0.001                           | <0.001                        |
| 50-60               | 4              | 2,348/5,058   | 26.9% (0.9-70.0)    | 99.8% (99.5-100)               | <0.001                           |                               |
| >60                 | 18             | 13,244/46,814 | 23.8% (15.9-32.8)   | 99.9% (99.8-100)               | <0.001                           |                               |
| No data             | 1              | 82/1,172      | 7.0% (5.6-8.6)      | NA                             | NA                               |                               |
| Measurement tools   |                |               |                     |                                |                                  |                               |
| IES-R               | 14             | 5,202/16,777  | 28.4% (18.5-39.6)   | 99.6% (99.4-99.7)              | <0.001                           | 0.620                         |
| PCL-5               | 8              | 3,217/12,472  | 18.3% (3.3-41.4)    | 99.9% (99.8-100)               | <0.001                           |                               |
| Others              | 6              | 8,123/27,198  | 22.3% (11.0-36.2)   | 99.8% (99.5-99.9)              | <0.001                           |                               |

Abbreviations: CI, confidence interval; IES-R, Impact of Event Scale-Revised; NA, not applicable; PCL-5, Posttraumatic Stress Disorder Checklist for Diagnostic and Statistical Manual of Mental Disorders, 5<sup>th</sup>.

**Table S11** Subgroup Analysis of Included Studies: Stress

| Subgroup comparison                                      | No. of studies | Cases/Total    | Prevalence (95% CI) | <i>I</i> <sup>2</sup> (95% CI) | <i>P</i> value for heterogeneity | <i>P</i> value for difference |
|----------------------------------------------------------|----------------|----------------|---------------------|--------------------------------|----------------------------------|-------------------------------|
| HDI groups, 2018 <sup>†</sup>                            |                |                |                     |                                |                                  |                               |
| Low                                                      | NA             | NA             | NA                  | NA                             | NA                               | 0.580                         |
| Medium                                                   | 5              | 3,176/6,427    | 39.7% (24.4-56.1)   | 99.4% (99.0-99.7)              | <0.001                           |                               |
| High                                                     | 7              | 18,196/64,164  | 40.3% (19.5-63.0)   | 99.9% (99.7-100)               | <0.001                           |                               |
| Very high                                                | 10             | 11,072/40,258  | 32.3% (26.2-38.7)   | 99.3% (99.1-99.4)              | <0.001                           |                               |
| GII, 2018 <sup>†</sup>                                   |                |                |                     |                                |                                  |                               |
| <0.439                                                   | 16             | 29,041/104,041 | 34.1% (27.2-41.5)   | 99.8% (99.5-100)               | <0.001                           | 0.570                         |
| ≥0.439                                                   | 5              | 3,176/6,427    | 39.7% (24.4-56.1)   | 99.4% (99.1-99.8)              | <0.001                           |                               |
| CSI during the survey <sup>‡</sup>                       |                |                |                     |                                |                                  |                               |
| Less stringent (<75)                                     | 3              | 1,121/2,051    | 58.4% (48.5-68.0)   | NA                             | NA                               | <0.001                        |
| Moderate stringent (75-85)                               | 11             | 22,107/77,808  | 30.9% (20.7-42.1)   | 99.8% (99.5-100)               | <0.001                           |                               |
| Very stringent (>85)                                     | 8              | 9,216/30,990   | 36.4% (25.2-48.4)   | 99.7% (99.5-100)               | <0.001                           |                               |
| Hospital beds per 10,000 people, 2010-2018 <sup>§</sup>  |                |                |                     |                                |                                  |                               |
| Low                                                      | 5              | 3,176/6,427    | 39.7% (24.4-56.1)   | 99.4% (99.0-99.8)              | <0.001                           | <0.001                        |
| Medium-low                                               | NA             | NA             | NA                  | NA                             | NA                               |                               |
| Medium                                                   | 2              | 3,153/4,364    | 72.3 (71.0-73.6)    | NA                             | NA                               |                               |
| Medium-high                                              | 14             | 25,888/99,677  | 29.4% (24.6-34.3)   | 99.5% (99.1-99.9)              | <0.001                           |                               |
| High                                                     | NA             | NA             | NA                  | NA                             | NA                               |                               |
| Current health expenditure (% of GDP), 2016 <sup>§</sup> |                |                |                     |                                |                                  |                               |
| Low                                                      | 6              | 6,092/10,431   | 45.4% (30.0-61.3)   | 99.6% (99.3-99.9)              | <0.001                           | 0.350                         |
| Medium-low                                               | 5              | 15,043/59,800  | 28.9% (12.6-48.6)   | 99.7% (99.5-99.9)              | <0.001                           |                               |
| Medium                                                   | NA             | NA             | NA                  | NA                             | NA                               |                               |
| Medium-high                                              | 5              | 6,889/26,746   | 32.7% (23.5-42.7)   | 99.5% (99.1-99.8)              | <0.001                           |                               |
| High                                                     | 5              | 4,193/13,491   | 33.0% (23.3-43.6)   | 99.2% (98.9-99.4)              | <0.001                           |                               |

<sup>†</sup>Based on the 2019 Human Development Report by the United Nations Development Programme.

<sup>‡</sup>Based on the Oxford COVID-19 Government Response Tracker—highest value during the surveys.

<sup>§</sup>Based on the 2020 global preparedness and vulnerability to respond to COVID-19 pandemic by the United Nations Development Programme.

Abbreviations: CI, confidence interval; CSI, Coronavirus Disease-2019 Government Response Stringency Index; GDP, gross domestic product; GII, Gender Inequality Index; HDI, Human Development Index; NA, not applicable.

**Table S11** Subgroup Analysis of Included Studies: Stress (Continued)

| Subgroup comparison                                                                             | No. of studies | Cases/Total    | Prevalence (95% CI) | <i>I</i> <sup>2</sup> (95% CI) | <i>P</i> value for heterogeneity | <i>P</i> value for difference |
|-------------------------------------------------------------------------------------------------|----------------|----------------|---------------------|--------------------------------|----------------------------------|-------------------------------|
| Real GDP growth 2020, estimates percent change <sup>¥</sup>                                     |                |                |                     |                                |                                  |                               |
| Below -3.0                                                                                      | 12             | 14,225/44,622  | 38.4% (28.5-48.8)   | 99.8% (99.5-100)               | <0.001                           | 0.630                         |
| Above -3.0                                                                                      | 10             | 18,219/66,227  | 34.2% (22.0-47.7)   | 99.7% (99.5-100)               | <0.001                           |                               |
| Resilience of a country's business environment <sup>£</sup>                                     |                |                |                     |                                |                                  |                               |
| First quartile                                                                                  | 10             | 11,072/40,258  | 32.3% (26.2-38.7)   | 99.3% (99.0-99.4)              | <0.001                           | 0.220                         |
| Second quartile                                                                                 | 3              | 589/1,733      | 39.3% (17.0-64.4)   | NA                             | NA                               |                               |
| Third quartile                                                                                  | 6              | 17,959/63,804  | 36.1% (14.8-60.7)   | 99.9% (99.7-100)               | <0.001                           |                               |
| Fourth quartile                                                                                 | 3              | 2,824/5,054    | 48.9% (34.6-63.3)   | NA                             | NA                               |                               |
| Immediate economic vulnerability: inbound tourism expenditure (% of GDP 2016-2018) <sup>§</sup> |                |                |                     |                                |                                  |                               |
| Low                                                                                             | 11             | 18,456/66,587  | 37.0% (24.8-50.2)   | 99.7% (99.5-100)               | <0.001                           | 0.600                         |
| Medium-low                                                                                      | NA             | NA             | NA                  | NA                             | NA                               |                               |
| Medium                                                                                          | 6              | 9,045/34,074   | 30.1% (22.8-38.0)   | 99.5% (99.1-99.8)              | <0.001                           |                               |
| Medium-high                                                                                     | 2              | 1,548/4,523    | 34.1% (32.7-35.4)   | NA                             | NA                               |                               |
| High                                                                                            | 3              | 3,395/5,665    | 50.3% (14.6-85.7)   | NA                             | NA                               |                               |
| Article type                                                                                    |                |                |                     |                                |                                  |                               |
| Published article                                                                               | 10             | 18,944/74,007  | 26.7% (21.6-32.1)   | 99.2% (98.8-99.4)              | <0.001                           | <0.001                        |
| Preprint reporting data                                                                         | 11             | 12,704/35,670  | 43.0% (29.6-57.1)   | 99.8% (99.6-100)               | <0.001                           |                               |
| Short communication/letter to editor/correspondence                                             | 1              | 796/1,172      | 67.9% (65.2-70.6)   | NA                             | NA                               |                               |
| Study design                                                                                    |                |                |                     |                                |                                  |                               |
| Cross-sectional study                                                                           | 19             | 29,272/106,419 | 33.5% (28.2-39.1)   | 99.6% (99.5-99.9)              | <0.001                           | <0.001                        |
| Longitudinal survey                                                                             | 3              | 3,172/4,430    | 57.6% (41.6-72.8)   | NA                             | NA                               |                               |
| Country                                                                                         |                |                |                     |                                |                                  |                               |
| Mainland China                                                                                  | 5              | 15,043/59,800  | 28.9% (12.6-48.6)   | 99.7% (99.5-99.9)              | <0.001                           | 0.360                         |
| Non-mainland China                                                                              | 17             | 17,401/51,049  | 38.8% (30.1-47.8)   | 99.7% (99.5-100)               | <0.001                           |                               |

<sup>¥</sup>Based on the World Economic Outlook, April 2020 by the International Monetary Fund.

<sup>£</sup>Based on the 2020 FM Global Resilience Index.

Abbreviations: CI, confidence interval; GDP, gross domestic product; NA, not applicable.

**Table S11** Subgroup Analysis of Included Studies: Stress (Continued)

| Subgroup comparison      | No. of studies | Cases/Total   | Prevalence (95% CI) | <i>I</i> <sup>2</sup> (95% CI) | <i>P</i> value for heterogeneity | <i>P</i> value for difference |
|--------------------------|----------------|---------------|---------------------|--------------------------------|----------------------------------|-------------------------------|
| Sample size              |                |               |                     |                                |                                  |                               |
| <1,000                   | 7              | 1,001/3,358   | 32.3% (15.6-51.6)   | 99.2% (98.8-99.4)              | <0.001                           | 0.090                         |
| 1,000-5,000              | 11             | 10,260/22,305 | 42.5% (30.4-55.1)   | 99.7% (99.5-99.9)              | <0.001                           |                               |
| >5,000                   | 4              | 21,183/85,186 | 27.9% (22.9-33.2)   | 99.5% (99.3-99.7)              | <0.001                           |                               |
| % Female                 |                |               |                     |                                |                                  |                               |
| <50                      | 5              | 3,038/6,600   | 31.7% (11.9-55.9)   | 99.7% (99.5-99.9)              | <0.001                           | <0.001                        |
| 50-60                    | 2              | 14,044/57,060 | 24.6% (24.2-24.9)   | NA                             | NA                               |                               |
| >60                      | 14             | 14,566/46,017 | 35.4% (26.7-44.6)   | 99.7% (99.5-100)               | <0.001                           |                               |
| No data                  | 1              | 796/1,172     | 76.9% (65.2-70.6)   | NA                             | NA                               |                               |
| Measurement tools        |                |               |                     |                                |                                  |                               |
| DASS-21: subscale stress | 17             | 10,745/30,487 | 32.6% (25.9-39.8)   | 99.3% (99.0-99.4)              | <0.001                           | 0.010                         |
| PSS-10                   | 4              | 7,882/23,683  | 57.0% (23.3-87.3)   | 99.9% (99.7-100)               | <0.001                           |                               |
| Others                   | 1              | 13,817/56,679 | 24.4% (24.0-24.7)   | NA                             | NA                               |                               |

Abbreviations: CI, confidence interval; DASS-21, Depression, Anxiety and Stress Scale-21; NA, not applicable; PSS-10, Perceived Stress Scale-10.

**Table S12** Subgroup Analysis of Included Studies: Psychological Distress

| Subgroup comparison                                      | No. of studies | Cases/Total   | Prevalence (95% CI) | <i>I</i> <sup>2</sup> (95% CI) | <i>P</i> value for heterogeneity | <i>P</i> value for difference |
|----------------------------------------------------------|----------------|---------------|---------------------|--------------------------------|----------------------------------|-------------------------------|
| HDI groups, 2018 <sup>†</sup>                            |                |               |                     |                                |                                  |                               |
| Low                                                      | NA             | NA            | NA                  | NA                             | NA                               | <0.001                        |
| Medium                                                   | 1              | 350/505       | 69.3% (65.1-73.3)   | NA                             | NA                               |                               |
| High                                                     | 8              | 20,768/58,437 | 50.6% (33.6-67.6)   | 99.7% (99.5-100)               | <0.001                           |                               |
| Very high                                                | 9              | 10,484/22,873 | 47.4% (35.4-59.4)   | 99.6% (99.5-99.9)              | <0.001                           |                               |
| GII, 2018 <sup>†</sup>                                   |                |               |                     |                                |                                  |                               |
| <0.439                                                   | 14             | 30,182/79,397 | 47.0% (38.4-55.6)   | 99.7% (99.5-99.9)              | <0.001                           | 0.420                         |
| ≥0.439                                                   | 4              | 1,420/2,418   | 60.8% (29.2-88.0)   | 99.6% (99.1-99.8)              | <0.001                           |                               |
| CSI during the survey <sup>‡</sup>                       |                |               |                     |                                |                                  |                               |
| Less stringent (<75)                                     | 5              | 2,422/4,822   | 49.0% (32.8-65.2)   | 99.2% ()                       | <0.001                           | 0.710                         |
| Moderate stringent (75-85)                               | 6              | 24,149/68,511 | 45.8% (35.6-56.1)   | 99.7% ()                       | <0.001                           |                               |
| Very stringent (>85)                                     | 7              | 5,031/8,482   | 54.4% (36.8-71.5)   | 99.6% ()                       | <0.001                           |                               |
| Hospital beds per 10,000 people, 2010-2018 <sup>§</sup>  |                |               |                     |                                |                                  |                               |
| Low                                                      | 1              | 350/505       | 69.3% (65.1-73.3)   | NA                             | NA                               | <0.001                        |
| Medium-low                                               | 3              | 1,070/1,913   | 57.8% (16.3-93.5)   | NA                             | NA                               |                               |
| Medium                                                   | 5              | 6,647/16,343  | 54.2% (36.9-71.0)   | 99.6% (99.5-99.9)              | <0.001                           |                               |
| Medium-high                                              | 8              | 23,156/62,388 | 41.2% (27.1-56.2)   | 99.8% (99.5-100)               | <0.001                           |                               |
| High                                                     | 1              | 379/666       | 56.9% (53.1-60.7)   | NA                             | NA                               |                               |
| Current health expenditure (% of GDP), 2016 <sup>§</sup> |                |               |                     |                                |                                  |                               |
| Low                                                      | 1              | 350/505       | 69.3% (65.1-73.3)   | NA                             | NA                               | <0.001                        |
| Medium-low                                               | 4              | 19,025/55,613 | 42.1% (22.5-63.0)   | 99.7% (99.5-99.9)              | <0.001                           |                               |
| Medium                                                   | NA             | NA            | NA                  | NA                             | NA                               |                               |
| Medium-high                                              | 6              | 4,777/8,137   | 42.7% (26.0-60.4)   | 99.5% (99.1-99.8)              | <0.001                           |                               |
| High                                                     | 7              | 7,450/17,560  | 58.0% (42.9-72.4)   | 99.6% (99.2-99.9)              | <0.001                           |                               |

<sup>†</sup>Based on the 2019 Human Development Report by the United Nations Development Programme.

<sup>‡</sup>Based on the Oxford COVID-19 Government Response Tracker—highest value during the surveys.

<sup>§</sup>Based on the 2020 global preparedness and vulnerability to respond to COVID-19 pandemic by the United Nations Development Programme.

Abbreviations: CI, confidence interval; CSI, Coronavirus Disease-2019 Government Response Stringency Index; GII, Gender Inequality Index; NA, not applicable.



**Table S12** Subgroup Analysis of Included Studies: Psychological Distress (Continued)

| Subgroup comparison                                                                             | No. of studies | Cases/Total   | Prevalence (95% CI) | <i>I</i> <sup>2</sup> (95% CI) | <i>P</i> value for heterogeneity | <i>P</i> value for difference |
|-------------------------------------------------------------------------------------------------|----------------|---------------|---------------------|--------------------------------|----------------------------------|-------------------------------|
| Real GDP growth 2020, estimates percent change <sup>¥</sup>                                     |                |               |                     |                                |                                  |                               |
| Below -3.0                                                                                      | 14             | 12,581/26,078 | 54.6% (43.3-65.6)   | 99.6% (99.5-99.9)              | <0.001                           | 0.040                         |
| Above -3.0                                                                                      | 4              | 19,021/55,737 | 34.5% (20.5-49.9)   | 99.5% (99.2-99.7)              | <0.001                           |                               |
| Resilience of a country's business environment <sup>£</sup>                                     |                |               |                     |                                |                                  |                               |
| First quartile                                                                                  | 9              | 10,484/22,873 | 47.4% (35.4-59.4)   | 99.6% (99.5-99.8)              | <0.001                           | <0.001                        |
| Second quartile                                                                                 | 2              | 1,027/1,292   | 80.2% (78.0-82.3)   | NA                             | NA                               |                               |
| Third quartile                                                                                  | 4              | 19,025/55,613 | 42.1% (22.5-63.0)   | 99.7% (99.5-99.9)              | <0.001                           |                               |
| Fourth quartile                                                                                 | 3              | 1,066/2,037   | 47.3% (17.5-78.3)   | NA                             | NA                               |                               |
| Immediate economic vulnerability: inbound tourism expenditure (% of GDP 2016-2018) <sup>§</sup> |                |               |                     |                                |                                  |                               |
| Low                                                                                             | 8              | 20,764/58,561 | 46.7% (31.4-62.3)   | 99.7% (99.5-99.9)              | <0.001                           | <0.001                        |
| Medium-low                                                                                      | 2              | 4,858/12,740  | 38.1% (37.3-39.0)   | NA                             | NA                               |                               |
| Medium                                                                                          | 4              | 1,572/3,366   | 46.2% (27.6-65.3)   | 99.0% (98.6-99.3)              | <0.001                           |                               |
| Medium-high                                                                                     | 3              | 4,054/6,767   | 49.2% (23.9-74.7)   | NA                             | NA                               |                               |
| High                                                                                            | 1              | 354/381       | 92.9% (89.9-95.3)   | NA                             | NA                               |                               |
| Article type                                                                                    |                |               |                     |                                |                                  |                               |
| Published article                                                                               | 6              | 5,144/10,142  | 37.4% (19.2-57.7)   | 99.8% (99.6-100)               | <0.001                           | 0.080                         |
| Preprint reporting data                                                                         | 8              | 19,375/55,730 | 64.6% (44.9-82.1)   | 99.7% (99.5-99.9)              | <0.001                           |                               |
| Short communication/letter to editor/correspondence                                             | 4              | 7,083/15,943  | 39.8% (28.3-51.8)   | 99.1% (98.7-99.2)              | <0.001                           |                               |
| Study design                                                                                    |                |               |                     |                                |                                  |                               |
| Cross-sectional study                                                                           | 15             | 26,473/67,308 | 54.2% (42.4-65.7)   | 99.8% (99.6-100)               | <0.001                           | <0.001                        |
| Longitudinal survey                                                                             | 3              | 5,129/14,507  | 30.2% (22.5-38.4)   | NA                             | NA                               |                               |

<sup>§</sup>Based on the 2020 global preparedness and vulnerability to respond to COVID-19 pandemic by the United Nations Development Programme.

<sup>¥</sup>Based on the World Economic Outlook, April 2020 by the International Monetary Fund.

<sup>£</sup>Based on the 2020 FM Global Resilience Index.

Abbreviations: CI, confidence interval; GDP, gross domestic product; NA, not applicable.

**Table S12** Subgroup Analysis of Included Studies: Psychological Distress (Continued)

| Subgroup comparison | No. of studies | Cases/Total   | Prevalence (95% CI) | <i>I</i> <sup>2</sup> (95% CI) | <i>P</i> value for heterogeneity | <i>P</i> value for difference |
|---------------------|----------------|---------------|---------------------|--------------------------------|----------------------------------|-------------------------------|
| Country             |                |               |                     |                                |                                  |                               |
| Mainland China      | 3              | 18,671/55,232 | 23.9% (12.6-37.4)   | NA                             | NA                               | <0.001                        |
| Non-mainland China  | 15             | 12,931/26,583 | 55.6% (44.7-66.2)   | 99.6% (99.5-99.9)              | <0.001                           |                               |
| Sample size         |                |               |                     |                                |                                  |                               |
| <1,000              | 10             | 3,143/5,689   | 57.0% (38.5-74.5)   | 99.5% (99.2-99.8)              | <0.001                           | 0.040                         |
| 1,000-5,000         | 6              | 5,825/11,322  | 43.4% (25.2-62.5)   | 99.8% (99.6-100)               | <0.001                           |                               |
| >5,000              | 2              | 22,634/64,804 | 34.9% (34.6-35.3)   | NA                             | NA                               |                               |
| % Female            |                |               |                     |                                |                                  |                               |
| <50                 | 4              | 1,736/4,217   | 44.6% (21.7-68.6)   | 99.6% (99.2-99.8)              | <0.001                           | 0.810                         |
| 50-60               | 7              | 6,274/15,454  | 49.1% (32.4-66.0)   | 99.5% (99.2-99.7)              | <0.001                           |                               |
| >60                 | 7              | 23,592/62,144 | 54.1% (36.9-70.7)   | 99.8% (99.5-100)               | <0.001                           |                               |
| Measurement tools   |                |               |                     |                                |                                  |                               |
| CPDI                | 5              | 19,911/55,409 | 56.8% (33.3-78.7)   | 99.7% (99.5-99.9)              | <0.001                           | 0.390                         |
| Kessler-6           | 5              | 2,019/5,444   | 37.2% (21.1-54.8)   | 99.4% (99.1-99.7)              | <0.001                           |                               |
| Kessler-10          | 3              | 923/1,547     | 65.2% (31.9-91.7)   | NA                             | NA                               |                               |
| Others              | 5              | 8,749/19,415  | 47.2% (27.6-67.2)   | 99.8% (99.6-100)               | <0.001                           |                               |

Abbreviations: CI, confidence interval; CPDI, COVID-19 Peri-traumatic Distress Index, NA, not applicable.

**Table S13** Subgroup Analysis of Included Studies: Sleep Problems

| Subgroup comparison                                      | No. of studies | Cases/Total   | Prevalence (95% CI) | <i>I</i> <sup>2</sup> (95% CI) | <i>P</i> value for heterogeneity | <i>P</i> value for difference |
|----------------------------------------------------------|----------------|---------------|---------------------|--------------------------------|----------------------------------|-------------------------------|
| HDI groups, 2018 <sup>†</sup>                            |                |               |                     |                                |                                  |                               |
| Low                                                      | 1              | 76/502        | 15.1% (12.1-18.6)   | NA                             | NA                               | <0.001                        |
| Medium                                                   | NA             | NA            | NA                  | NA                             | NA                               |                               |
| High                                                     | 10             | 22,421/76,543 | 27.1% (20.2-34.5)   | 99.6% (99.5-99.8)              | <0.001                           |                               |
| Very high                                                | 4              | 3,140/22,489  | 32.2% (9.1-61.3)    | 99.9% (99.7-100)               | <0.001                           |                               |
| GII, 2018 <sup>†</sup>                                   |                |               |                     |                                |                                  |                               |
| <0.439                                                   | 14             | 25,561/99,032 | 28.6% (20.4-37.5)   | 99.8% (99.6-100)               | <0.001                           | NA                            |
| ≥0.439                                                   | NA             | NA            | NA                  | NA                             | NA                               |                               |
| CSI during the survey <sup>‡</sup>                       |                |               |                     |                                |                                  |                               |
| Less stringent (<75)                                     | 2              | 946/1,979     | 47.8% (45.6-50.0)   | NA                             | NA                               | <0.001                        |
| Moderate stringent (75-85)                               | 12             | 23,385/79,408 | 26.8% (20.7-33.4)   | 99.5% (99.1-99.8)              | <0.001                           |                               |
| Very stringent (>85)                                     | 1              | 1,306/18,147  | 7.2% (6.8-7.6)      | NA                             | NA                               |                               |
| Hospital beds per 10,000 people, 2010-2018 <sup>§</sup>  |                |               |                     |                                |                                  |                               |
| Low                                                      | NA             | NA            | NA                  | NA                             | NA                               | <0.001                        |
| Medium-low                                               | NA             | NA            | NA                  | NA                             | NA                               |                               |
| Medium                                                   | 2              | 2,417/4,673   | 51.7% (50.3-53.2)   | NA                             | NA                               |                               |
| Medium-high                                              | 12             | 23,144/94,359 | 25.8% (17.8-34.7)   | 99.8% (99.6-100)               | <0.001                           |                               |
| High                                                     | NA             | NA            | NA                  | NA                             | NA                               |                               |
| Current health expenditure (% of GDP), 2016 <sup>§</sup> |                |               |                     |                                |                                  |                               |
| Low                                                      | 3              | 2,493/5,175   | 35.0% (14.7-58.6)   | NA                             | NA                               | 0.610                         |
| Medium-low                                               | 9              | 20,264/72,539 | 24.2% (18.6-30.2)   | 99.3% (99.1-99.4)              | <0.001                           |                               |
| Medium                                                   | NA             | NA            | NA                  | NA                             | NA                               |                               |
| Medium-high                                              | 3              | 2,880/21,820  | 30.0% (5.2-64.3)    | NA                             | NA                               |                               |
| High                                                     | NA             | NA            | NA                  | NA                             | NA                               |                               |

<sup>†</sup>Based on the 2019 Human Development Report by the United Nations Development Programme.

<sup>‡</sup>Based on the Oxford COVID-19 Government Response Tracker—highest value during the surveys.

<sup>§</sup>Based on the 2020 global preparedness and vulnerability to respond to COVID-19 pandemic by the United Nations Development Programme.

Abbreviations: CI, confidence interval; CSI, Coronavirus Disease-2019 Government Response Stringency Index; GDP, gross domestic product; GII, Gender Inequality Index; HDI, Human Development Index; NA, not applicable.

**Table S13** Subgroup Analysis of Included Studies: Sleep Problems (Continued)

| Subgroup comparison                                                                             | No. of studies | Cases/Total   | Prevalence (95% CI) | <i>I</i> <sup>2</sup> (95% CI) | <i>P</i> value for heterogeneity | <i>P</i> value for difference |
|-------------------------------------------------------------------------------------------------|----------------|---------------|---------------------|--------------------------------|----------------------------------|-------------------------------|
| Real GDP growth 2020, estimates percent change <sup>¥</sup>                                     |                |               |                     |                                |                                  |                               |
| Below -3.0                                                                                      | 5              | 5,113/26,326  | 31.2% (9.0-59.5)    | 99.9% (99.7-100)               | <0.001                           | 0.680                         |
| Above -3.0                                                                                      | 10             | 20,524/73,208 | 25.6% (20.2-31.3)   | 99.2% (98.8-99.4)              | <0.001                           |                               |
| Resilience of a country's business environment <sup>£</sup>                                     |                |               |                     |                                |                                  |                               |
| First quartile                                                                                  | 2              | 1,992/19,457  | 9.2% (8.8-9.6)      | NA                             | NA                               | <0.001                        |
| Second quartile                                                                                 | 2              | 1,148/3,032   | 37.9% (36.1-39.6)   | NA                             | NA                               |                               |
| Third quartile                                                                                  | 10             | 22,421/76,543 | 27.1% (20.2-34.5)   | 99.6% (99.5-99.9)              | <0.001                           |                               |
| Fourth quartile                                                                                 | 1              | 76/502        | 15.1% (12.1-18.6)   | NA                             | NA                               |                               |
| Immediate economic vulnerability: inbound tourism expenditure (% of GDP 2016-2018) <sup>§</sup> |                |               |                     |                                |                                  |                               |
| Low                                                                                             | 10             | 20,340/73,041 | 23.2% (18.0-28.8)   | 99.2% (98.7-99.4)              | <0.001                           | <0.001                        |
| Medium-low                                                                                      | NA             | NA            | NA                  | NA                             | NA                               |                               |
| Medium                                                                                          | 2              | 1,992/19,457  | 9.2% (8.8-9.6)      | NA                             | NA                               |                               |
| Medium-high                                                                                     | 1              | 260/669       | 38.9% (35.2-42.7)   | NA                             | NA                               |                               |
| High                                                                                            | 2              | 3,045/6,367   | 47.8% (46.6-49.0)   | NA                             | NA                               |                               |
| Article type                                                                                    |                |               |                     |                                |                                  |                               |
| Published article                                                                               | 8              | 19,640/69,040 | 29.1% (22.4-36.3)   | 99.3% (99.0-99.4)              | <0.001                           | 0.880                         |
| Preprint reporting data                                                                         | 4              | 3,799/23,322  | 26.6% (3.7-60.3)    | 99.9% (99.7-100)               | <0.001                           |                               |
| Short communication/letter to editor/correspondence                                             | 3              | 2,198/7,172   | 24.4% (9.9-42.9)    | NA                             | NA                               |                               |
| Study design                                                                                    |                |               |                     |                                |                                  |                               |
| Cross-sectional study                                                                           | 13             | 23,452/95,464 | 24.8% (17.3-33.2)   | 99.8% (99.5-100)               | <0.001                           | <0.001                        |
| Longitudinal survey                                                                             | 2              | 2,185/4,070   | 53.7% (19.8-36.1)   | NA                             | NA                               |                               |
| Country                                                                                         |                |               |                     |                                |                                  |                               |
| Mainland China                                                                                  | 9              | 20,264/72,539 | 24.2% (18.6-30.2)   | 99.3% (99.0-99.4)              | <0.001                           | 0.500                         |
| Non-mainland China                                                                              | 6              | 5,373/26,995  | 32.5% (11.7-57.8)   | 99.9% (99.7-100)               | <0.001                           |                               |

<sup>¥</sup>Based on the World Economic Outlook, April 2020 by the International Monetary Fund.

<sup>£</sup>Based on the 2020 FM Global Resilience Index.

Abbreviations: CI, confidence interval; GDP, gross domestic product; NA, not applicable.

**Table S13** Subgroup Analysis of Included Studies: Sleep Problems (Continued)

| Subgroup comparison | No. of studies | Cases/Total   | Prevalence (95% CI) | <i>I</i> <sup>2</sup> (95% CI) | <i>P</i> value for heterogeneity | <i>P</i> value for difference |
|---------------------|----------------|---------------|---------------------|--------------------------------|----------------------------------|-------------------------------|
| Sample size         |                |               |                     |                                |                                  |                               |
| <1,000              | 4              | 462/1,910     | 26.3% (13.3-41.8)   | 97.9% (96.0-99.1)              | <0.001                           | 0.280                         |
| 1,000-5,000         | 9              | 7,305/22,798  | 30.8% (20.7-42.0)   | 99.7% (99.5-100)               | <0.001                           |                               |
| >5,000              | 2              | 17,870/74,826 | 22.9% (22.6-23.2)   | NA                             | NA                               |                               |
| % Female            |                |               |                     |                                |                                  |                               |
| <50                 | 2              | 174/1,175     | 14.8% (12.8-16.9)   | NA                             | NA                               | <0.001                        |
| 50-60               | 4              | 17,709/61,044 | 29.4% (24.0-35.1)   | 97.6% (96.1-99.4)              | <0.001                           |                               |
| >60                 | 7              | 6,884/31,157  | 36.4% (17.7-57.6)   | 99.9% (99.7-100)               | <0.001                           |                               |
| No data             | 2              | 870/6,158     | 13.9% (13.1-14.8)   | NA                             | NA                               |                               |
| Measurement tools   |                |               |                     |                                |                                  |                               |
| ISI                 | 8              | 21,894/86,069 | 22.3% (12.0-34.8)   | 99.9% (99.7-100)               | <0.001                           | 0.040                         |
| PSQI                | 5              | 2,595/10,433  | 32.4% (19.2-47.3)   | 99.5% (99.1-99.8)              | <0.001                           |                               |
| Others              | 2              | 1,148/3,032   | 37.9% (36.1-39.6)   | NA                             | NA                               |                               |

Abbreviations: CI, confidence interval; ISI, Insomnia Severity Index; NA, not applicable; PSQI, Pittsburgh Sleep Quality Index.

**Table S14** Sensitivity Analysis by Restricting the Analysis to Studies with a Low Risk of Bias

| <b>Primary outcomes</b>        | <b>No. of studies</b> | <b>Cases/Total</b> | <b>Prevalence (95% CI)</b> | <b><i>I</i><sup>2</sup> (95% CI)</b> | <b><i>P</i> value for heterogeneity</b> |
|--------------------------------|-----------------------|--------------------|----------------------------|--------------------------------------|-----------------------------------------|
| Depression                     | 55                    | 63,084/255,913     | 28.6% (24.1-32.3)          | 99.7% (99.5-99.9)                    | <0.001                                  |
| Anxiety                        | 57                    | 61,857/264,968     | 27.4% (24.1-30.8)          | 99.7% (99.5-100)                     | <0.001                                  |
| Post-traumatic stress symptoms | 16                    | 13,867/42,847      | 30.2% (20.3-41.1)          | 99.8% (99.5-100)                     | <0.001                                  |
| Stress                         | 17                    | 31,079/106,575     | 40.1% (32.5-47.9)          | 99.8% (99.6-100)                     | <0.001                                  |
| Psychological distress         | 8                     | 24,165/63,776      | 45.4% (32.0-59.2)          | 99.6% (99.5-99.8)                    | <0.001                                  |
| Sleep problems                 | 13                    | 25,511/98,795      | 27.7% (19.4-36.9)          | 99.8% (99.5-100)                     | <0.001                                  |

Abbreviation: CI, confidence interval.

**Table S15** Univariable Meta-Regression of Included Studies: Depression

| Covariate                                                                                                        | No. of studies | Regression Equation $\beta$ Coefficient (95% CI)* | P value          |
|------------------------------------------------------------------------------------------------------------------|----------------|---------------------------------------------------|------------------|
| WHO Region (reference, Africa Region)                                                                            | 75             | <b>-0.022 (-0.043 to -0.001)</b>                  | <b>0.036</b>     |
| World Bank, by income groups (reference, lower middle income)                                                    | 75             | -0.041 (-0.088 to 0.007)                          | 0.096            |
| HDI groups, 2018 <sup>†</sup> (per index unit)                                                                   | 75             | -0.221 (-0.528 to 0.086)                          | 0.155            |
| GII, 2018 <sup>†</sup> (per index unit)                                                                          | 72             | <b>0.414 (0.196 to 0.632)</b>                     | <b>&lt;0.001</b> |
| CSI during the survey <sup>‡</sup> (per index unit)                                                              | 74             | 0.003 (-0.001 to 0.006)                           | 0.105            |
| Hospital beds per 10,000 people, 2010-2018 <sup>§</sup> (per index unit)                                         | 71             | <b>-0.003 (-0.005 to -0.001)</b>                  | <b>0.003</b>     |
| Current health expenditure (% of GDP), 2016 <sup>§</sup> (per index unit)                                        | 73             | -0.001 (-0.009 to 0.008)                          | 0.915            |
| Real GDP growth 2020, estimates percent change <sup>¥</sup> (per index unit)                                     | 75             | -0.001 (-0.009 to 0.007)                          | 0.806            |
| Resilience of a country's business environment <sup>£</sup> (per index unit)                                     | 75             | -0.001 (-0.002 to 0.001)                          | 0.332            |
| Immediate economic vulnerability: inbound tourism expenditure (% of GDP 2016-2018) <sup>§</sup> (per index unit) | 75             | 0.005 (-0.005 to 0.016)                           | 0.341            |
| Article type (reference, published article)                                                                      | 75             | 0.020 (-0.013 to 0.054)                           | 0.235            |
| Study design (cross-sectional vs longitudinal survey)                                                            | 75             | 0.001 (-0.094 to 0.110)                           | 0.870            |
| Country (mainland China vs. non-mainland China)                                                                  | 75             | <b>0.083 (0.016 to 0.150)</b>                     | <b>0.015</b>     |
| Risk of bias (per 1 point)                                                                                       | 75             | -0.013 (-0.039 to 0.013)                          | 0.329            |
| Sample size (per number of participants)                                                                         | 75             | -1.96e-06<br>(-5.46e-06 to 1.54e-06)              | 0.269            |
| Age (mean, per 1 year)                                                                                           | 51             | -0.003 (-0.007 to 0.001)                          | 0.109            |
| Female (per %)                                                                                                   | 72             | 0.001 (-0.002 to 0.003)                           | 0.622            |
| Measurement tools (reference, PHQ-9)                                                                             | 75             | 0.009 (-0.008 to 0.026)                           | 0.284            |

\* $\beta$  coefficient for natural logarithm of effect size for each variable of interest reflecting unit change.

<sup>†</sup>Based on the 2019 Human Development Report by the United Nations Development Programme.

<sup>‡</sup>Based on the Oxford COVID-19 Government Response Tracker—highest value during the surveys.

<sup>§</sup>Based on the 2020 global preparedness and vulnerability to respond to COVID-19 pandemic by the United Nations Development Programme.

<sup>¥</sup>Based on the World Economic Outlook, April 2020 by the International Monetary Fund.

<sup>£</sup>Based on the 2020 FM Global Resilience Index.

Abbreviations: CI, confidence interval; CSI, Coronavirus Disease-2019 Government Response Stringency Index; GDP, gross domestic product; GII, Gender Inequality Index; HDI, Human Development Index; NA, not applicable; PHQ-9, Patient Health Questionnaire-9.

**Table S15** Univariable Meta-Regression of Included Studies: Anxiety (Continued)

| Covariate                                                                                                        | No. of studies | Regression Equation $\beta$ Coefficient (95% CI)* | P value      |
|------------------------------------------------------------------------------------------------------------------|----------------|---------------------------------------------------|--------------|
| WHO Region (reference, Africa Region)                                                                            | 75             | <b>-0.038 (-0.060 to -0.015)</b>                  | <b>0.001</b> |
| World Bank, by income groups (reference, lower middle income)                                                    | 75             | -0.029 (-0.077 to 0.019)                          | 0.236        |
| HDI groups, 2018 <sup>†</sup> (per index unit)                                                                   | 75             | -0.208 (-0.530 to 0.114)                          | 0.202        |
| GII, 2018 <sup>†</sup> (per index unit)                                                                          | 72             | <b>0.279 (0.054 to 0.504)</b>                     | <b>0.016</b> |
| CSI during the survey <sup>‡</sup> (per index unit)                                                              | 73             | 0.001 (-0.002 to 0.004)                           | 0.627        |
| Hospital beds per 10,000 people, 2010-2018 <sup>§</sup> (per index unit)                                         | 72             | <b>-0.003 (-0.004 to -0.001)</b>                  | <b>0.007</b> |
| Current health expenditure (% of GDP), 2016 <sup>§</sup> (per index unit)                                        | 73             | 0.002 (-0.008 to 0.012)                           | 0.750        |
| Real GDP growth 2020, estimates percent change <sup>¥</sup> (per index unit)                                     | 75             | -0.003 (-0.011 to 0.006)                          | 0.496        |
| Resilience of a country's business environment <sup>£</sup> (per index unit)                                     | 75             | -0.001 (-0.002 to 0.001)                          | 0.339        |
| Immediate economic vulnerability: inbound tourism expenditure (% of GDP 2016-2018) <sup>§</sup> (per index unit) | 75             | -0.004 (-0.015 to 0.007)                          | 0.448        |
| Article type (reference, published article)                                                                      | 75             | 0.022 (-0.012 to 0.057)                           | 0.204        |
| Study design (cross-sectional vs longitudinal survey)                                                            | 75             | 0.067 (-0.050 to 0.184)                           | 0.259        |
| Country (mainland China vs. non-mainland China)                                                                  | 75             | 0.064 (-0.006 to 0.134)                           | 0.072        |
| Risk of bias (per 1 point)                                                                                       | 75             | 0.001 (-0.027 to 0.030)                           | 0.931        |
| Sample size (per number of participants)                                                                         | 75             | -2.13e-06<br>(-5.76e-06 to 1.49e-06)              | 0.245        |
| Age (mean, per 1 year)                                                                                           | 50             | -0.002 (-0.007 to 0.002)                          | 0.307        |
| Female (per %)                                                                                                   | 72             | 0.001 (-0.002 to 0.003)                           | 0.583        |
| Measurement tools (reference, GAD-7)                                                                             | 75             | -0.008 (-0.017 to 0.032)                          | 0.546        |

\* $\beta$  coefficient for natural logarithm of effect size for each variable of interest reflecting unit change.

<sup>†</sup>Based on the 2019 Human Development Report by the United Nations Development Programme.

<sup>‡</sup>Based on the Oxford COVID-19 Government Response Tracker—highest value during the surveys.

<sup>§</sup>Based on the 2020 global preparedness and vulnerability to respond to COVID-19 pandemic by the United Nations Development Programme.

<sup>¥</sup>Based on the World Economic Outlook, April 2020 by the International Monetary Fund.

<sup>£</sup>Based on the 2020 FM Global Resilience Index.

Abbreviations: CI, confidence interval; CSI, Coronavirus Disease-2019 Government Response Stringency Index; GAD-7, General Anxiety Disorder-7; GDP, gross domestic product; GII, Gender Inequality Index; HDI, Human Development Index; NA, not applicable.



**Table S15** Univariable Meta-Regression of Included Studies: Post-Traumatic Stress Symptoms (Continued)

| Covariate                                                                                                        | No. of studies | Regression Equation $\beta$ Coefficient (95% CI)* | P value      |
|------------------------------------------------------------------------------------------------------------------|----------------|---------------------------------------------------|--------------|
| WHO Region (reference, Africa Region)                                                                            | 28             | -0.024 (-0.086 to 0.038)                          | 0.442        |
| World Bank, by income groups (reference, lower middle income)                                                    | 28             | -0.014 (-0.134 to 0.108)                          | 0.820        |
| HDI groups, 2018 <sup>†</sup> (per index unit)                                                                   | 28             | -0.141 (-1.035 to 0.753)                          | 0.748        |
| GII, 2018 <sup>†</sup> (per index unit)                                                                          | 27             | 0.212 (-0.603 to 1.027)                           | 0.597        |
| CSI during the survey <sup>‡</sup> (per index unit)                                                              | 28             | 0.005 (-0.006 to 0.016)                           | 0.363        |
| Hospital beds per 10,000 people, 2010-2018 <sup>§</sup> (per index unit)                                         | 27             | -0.004 (-0.013 to 0.005)                          | 0.387        |
| Current health expenditure (% of GDP), 2016 <sup>§</sup> (per index unit)                                        | 28             | 0.001 (-0.028 to 0.031)                           | 0.926        |
| Real GDP growth 2020, estimates percent change <sup>¥</sup> (per index unit)                                     | 28             | -0.004 (-0.024 to 0.016)                          | 0.689        |
| Resilience of a country's business environment <sup>£</sup> (per index unit)                                     | 28             | -0.001 (-0.005 to 0.004)                          | 0.829        |
| Immediate economic vulnerability: inbound tourism expenditure (% of GDP 2016-2018) <sup>§</sup> (per index unit) | 28             | 0.026 (-0.014 to 0.065)                           | 0.194        |
| Article type (reference, published article)                                                                      | 28             | -0.040 (-0.134 to 0.054)                          | 0.385        |
| Study design (cross-sectional vs longitudinal survey)                                                            | 28             | -0.171 (-0.430 to 0.087)                          | 0.184        |
| Country (mainland China vs. non-mainland China)                                                                  | 28             | 0.088 (-0.076 to 0.253)                           | 0.280        |
| Risk of bias (per 1 point)                                                                                       | 28             | <b>-0.072 (-0.137 to -0.006)</b>                  | <b>0.033</b> |
| Sample size (per number of participants)                                                                         | 28             | 5.66e-06 (-0.000 to 0.000)                        | 0.650        |
| Age (mean, per 1 year)                                                                                           | 18             | 0.000 (-0.008 to 0.008)                           | 0.993        |
| Female (per %)                                                                                                   | 27             | 0.001 (-0.005 to 0.007)                           | 0.813        |
| Measurement tools (reference, IES-R)                                                                             | 28             | -0.038 (-0.140 to 0.066)                          | 0.461        |

\* $\beta$  coefficient for natural logarithm of effect size for each variable of interest reflecting unit change.

<sup>†</sup>Based on the 2019 Human Development Report by the United Nations Development Programme.

<sup>‡</sup>Based on the Oxford COVID-19 Government Response Tracker—highest value during the surveys.

<sup>§</sup>Based on the 2020 global preparedness and vulnerability to respond to COVID-19 pandemic by the United Nations Development Programme.

<sup>¥</sup>Based on the World Economic Outlook, April 2020 by the International Monetary Fund.

<sup>£</sup>Based on the 2020 FM Global Resilience Index.

Abbreviations: CI, confidence interval; CSI, Coronavirus Disease-2019 Government Response Stringency Index; GDP, gross domestic product; GII, Gender Inequality Index; HDI, Human Development Index; IES-R, Impact of Event Scale-Revised; NA, not applicable.

**Table S15** Univariable Meta-Regression of Included Studies: Stress (Continued)

| Covariate                                                                                                        | No. of studies | Regression Equation $\beta$ Coefficient (95% CI)* | P value      |
|------------------------------------------------------------------------------------------------------------------|----------------|---------------------------------------------------|--------------|
| WHO Region (reference, Africa Region)                                                                            | 22             | -0.043 (-0.104 to 0.017)                          | 0.152        |
| World Bank, by income groups (reference, lower middle income)                                                    | 22             | -0.045 (-0.152 to 0.063)                          | 0.396        |
| HDI groups, 2018 <sup>†</sup> (per index unit)                                                                   | 22             | -0.296 (-1.055 to 0.464)                          | 0.426        |
| GII, 2018 <sup>†</sup> (per index unit)                                                                          | 21             | 0.382 (-0.070 to 0.834)                           | 0.093        |
| CSI during the survey <sup>‡</sup> (per index unit)                                                              | 22             | -0.004 (-0.014 to 0.006)                          | 0.458        |
| Hospital beds per 10,000 people, 2010-2018 <sup>§</sup> (per index unit)                                         | 21             | -0.004 (-0.011 to 0.002)                          | 0.172        |
| Current health expenditure (% of GDP), 2016 <sup>§</sup> (per index unit)                                        | 21             | -0.010 (-0.041 to 0.020)                          | 0.482        |
| Real GDP growth 2020, estimates percent change <sup>¥</sup> (per index unit)                                     | 22             | 0.001 (-0.018 to 0.020)                           | 0.922        |
| Resilience of a country's business environment <sup>£</sup> (per index unit)                                     | 22             | -0.002 (-0.006 to 0.002)                          | 0.226        |
| Immediate economic vulnerability: inbound tourism expenditure (% of GDP 2016-2018) <sup>§</sup> (per index unit) | 22             | 0.011 (-0.012 to 0.033)                           | 0.336        |
| Article type (reference, published article)                                                                      | 22             | 0.077 (-0.005 to 0.159)                           | 0.065        |
| Study design (cross-sectional vs longitudinal survey)                                                            | 22             | <b>0.244 (0.003 to 0.485)</b>                     | <b>0.047</b> |
| Country (mainland China vs. non-mainland China)                                                                  | 22             | 0.078 (-0.131 to 0.286)                           | 0.448        |
| Risk of bias (per 1 point)                                                                                       | 22             | -0.022 (-0.093 to 0.050)                          | 0.539        |
| Sample size (per number of participants)                                                                         | 22             | 2.99e-06<br>(-0.00 to 4.13e-06)                   | 0.391        |
| Age (mean, per 1 year)                                                                                           | 18             | -0.010 (-0.022 to 0.003)                          | 0.118        |
| Female (per %)                                                                                                   | 21             | -0.001 (-0.006 to 0.004)                          | 0.830        |
| Measurement tools (reference, DASS-21)                                                                           | 22             | 0.078 (-0.079 to 0.235)                           | 0.315        |

\* $\beta$  coefficient for natural logarithm of effect size for each variable of interest reflecting unit change.

<sup>†</sup>Based on the 2019 Human Development Report by the United Nations Development Programme.

<sup>‡</sup>Based on the Oxford COVID-19 Government Response Tracker—highest value during the surveys.

<sup>§</sup>Based on the 2020 global preparedness and vulnerability to respond to COVID-19 pandemic by the United Nations Development Programme.

<sup>¥</sup>Based on the World Economic Outlook, April 2020 by the International Monetary Fund.

<sup>£</sup>Based on the 2020 FM Global Resilience Index.

Abbreviations: CI, confidence interval; CSI, Coronavirus Disease-2019 Government Response Stringency Index; DASS-21, Depression, Anxiety and Stress Scale-21; GDP, gross domestic product; GII, Gender Inequality Index; HDI, Human Development Index; NA, not applicable.

**Table S15** Univariable Meta-Regression of Included Studies: Psychological Distress (Continued)

| Covariate                                                                                                        | No. of studies | Regression Equation $\beta$ Coefficient (95% CI)* | P value      |
|------------------------------------------------------------------------------------------------------------------|----------------|---------------------------------------------------|--------------|
| WHO Region (reference, Africa Region)                                                                            | 18             | <b>-0.093 (-0.181 to -0.004)</b>                  | <b>0.041</b> |
| World Bank, by income groups (reference, lower middle income)                                                    | 18             | -0.063 (-0.273 to 0.147)                          | 0.533        |
| HDI groups, 2018 <sup>†</sup> (per index unit)                                                                   | 18             | -0.480 (-1.849 to 0.889)                          | 0.468        |
| GII, 2018 <sup>†</sup> (per index unit)                                                                          | 18             | 0.496 (-0.187 to 1.179)                           | 0.143        |
| CSI during the survey <sup>‡</sup> (per index unit)                                                              | 18             | 0.002 (-0.008 to 0.011)                           | 0.676        |
| Hospital beds per 10,000 people, 2010-2018 <sup>§</sup> (per index unit)                                         | 18             | -0.003 (-0.011 to 0.004)                          | 0.358        |
| Current health expenditure (% of GDP), 2016 <sup>§</sup> (per index unit)                                        | 18             | 0.018 (-0.030 to 0.066)                           | 0.439        |
| Real GDP growth 2020, estimates percent change <sup>¥</sup> (per index unit)                                     | 18             | -0.007 (-0.042 to 0.027)                          | 0.654        |
| Resilience of a country's business environment <sup>£</sup> (per index unit)                                     | 18             | -0.000 (-0.005 to 0.005)                          | 0.968        |
| Immediate economic vulnerability: inbound tourism expenditure (% of GDP 2016-2018) <sup>§</sup> (per index unit) | 18             | 0.027 (-0.008 to 0.061)                           | 0.119        |
| Article type (reference, published article)                                                                      | 18             | 0.127 (-0.001 to 0.256)                           | 0.052        |
| Study design (cross-sectional vs longitudinal survey)                                                            | 18             | -0.234 (-0.550 to 0.081)                          | 0.135        |
| Country (mainland China vs. non-mainland China)                                                                  | 18             | <b>0.303 (0.004 to 0.601)</b>                     | <b>0.047</b> |
| Risk of bias (per 1 point)                                                                                       | 18             | -0.002 (-0.112 to 0.108)                          | 0.963        |
| Sample size (per number of participants)                                                                         | 18             | -3.52e-06<br>(-0.000 to 6.81e-06)                 | 0.481        |
| Age (mean, per 1 year)                                                                                           | 9              | -0.008 (-0.024 to 0.010)                          | 0.332        |
| Female (per %)                                                                                                   | 18             | 0.006 (-0.006 to 0.017)                           | 0.329        |
| Measurement tools (reference, CPDI)                                                                              | 18             | -0.044 (-0.151 to 0.062)                          | 0.387        |

\* $\beta$  coefficient for natural logarithm of effect size for each variable of interest reflecting unit change.

<sup>†</sup>Based on the 2019 Human Development Report by the United Nations Development Programme.

<sup>‡</sup>Based on the Oxford COVID-19 Government Response Tracker—highest value during the surveys.

<sup>§</sup>Based on the 2020 global preparedness and vulnerability to respond to COVID-19 pandemic by the United Nations Development Programme.

<sup>¥</sup>Based on the World Economic Outlook, April 2020 by the International Monetary Fund.

<sup>£</sup>Based on the 2020 FM Global Resilience Index.

Abbreviations: CI, confidence interval; CPDI, COVID-19 Peri-traumatic Distress Index; CSI, Coronavirus Disease-2019 Government Response Stringency Index; GDP, gross domestic product; GII, Gender Inequality Index; HDI, Human Development Index; NA, not applicable.

**Table S15** Univariable Meta-Regression of Included Studies: Sleep Problems (Continued)

| Covariate                                                                                                        | No. of studies | Regression Equation $\beta$ Coefficient (95% CI)* | P value      |
|------------------------------------------------------------------------------------------------------------------|----------------|---------------------------------------------------|--------------|
| WHO Region (reference, Africa Region)                                                                            | 15             | -0.010 (-0.070 to 0.049)                          | 0.710        |
| World Bank, by income groups (reference, lower middle income)                                                    | 15             | 0.063 (-0.109 to 0.235)                           | 0.442        |
| HDI groups, 2018 <sup>†</sup> (per index unit)                                                                   | 15             | 0.515 (-0.559 to 1.590)                           | 0.319        |
| GII, 2018 <sup>†</sup> (per index unit)                                                                          | 14             | 0.773 (-0.357 to 1.903)                           | 0.162        |
| CSI during the survey <sup>‡</sup> (per index unit)                                                              | 15             | <b>-0.013 (-0.026 to -0.001)</b>                  | <b>0.040</b> |
| Hospital beds per 10,000 people, 2010-2018 <sup>§</sup> (per index unit)                                         | 14             | -0.008 (-0.019 to 0.002)                          | 0.104        |
| Current health expenditure (% of GDP), 2016 <sup>§</sup> (per index unit)                                        | 15             | 0.002 (-0.048 to 0.053)                           | 0.924        |
| Real GDP growth 2020, estimates percent change <sup>¥</sup> (per index unit)                                     | 15             | -0.010 (-0.029 to 0.009)                          | 0.267        |
| Resilience of a country's business environment <sup>£</sup> (per index unit)                                     | 15             | 0.002 (-0.005 to 0.010)                           | 0.476        |
| Immediate economic vulnerability: inbound tourism expenditure (% of GDP 2016-2018) <sup>§</sup> (per index unit) | 15             | <b>0.021 (0.002 to 0.039)</b>                     | <b>0.029</b> |
| Article type (reference, published article)                                                                      | 15             | -0.006 (-0.109 to 0.097)                          | 0.900        |
| Study design (cross-sectional vs longitudinal survey)                                                            | 15             | 0.237 (-0.008 to 0.482)                           | 0.056        |
| Country (mainland China vs. non-mainland China)                                                                  | 15             | 0.094 (-0.076 to 0.263)                           | 0.254        |
| Risk of bias (per 1 point)                                                                                       | 15             | -0.010 (-0.096 to 0.076)                          | 0.803        |
| Sample size (per number of participants)                                                                         | 15             | -1.01e-06<br>(-7.15e-06 to 5.13e-06)              | 0.728        |
| Age (mean, per 1 year)                                                                                           | 10             | -0.021 (-0.041 to 0.000)                          | 0.051        |
| Female (per %)                                                                                                   | 13             | 0.003 (-0.003 to 0.010)                           | 0.279        |
| Measurement tools (reference, ISI)                                                                               | 15             | 0.074 (-0.041 to 0.190)                           | 0.189        |

\* $\beta$  coefficient for natural logarithm of effect size for each variable of interest reflecting unit change.

<sup>†</sup>Based on the 2019 Human Development Report by the United Nations Development Programme.

<sup>‡</sup>Based on the Oxford COVID-19 Government Response Tracker—highest value during the surveys.

<sup>§</sup>Based on the 2020 global preparedness and vulnerability to respond to COVID-19 pandemic by the United Nations Development Programme.

<sup>¥</sup>Based on the World Economic Outlook, April 2020 by the International Monetary Fund.

<sup>£</sup>Based on the 2020 FM Global Resilience Index.

Abbreviations: CI, confidence interval; CSI, Coronavirus Disease-2019 Government Response Stringency Index; GDP, gross domestic product; GII, Gender Inequality Index; HDI, Human Development Index; ISI, Insomnia Severity Index; NA, not applicable.

**Table S16** Meta-Analysis of Included Studies with Calibration for Publication Bias<sup>†</sup>

| <b>Outcomes</b>                | <b>No. of studies</b> | <b><i>P</i> value for Begg's test</b> | <b><i>P</i> value for Egger's test</b> | <b>Prevalence estimates (95% CI)</b> | <b><i>I</i><sup>2</sup> (95% CI)</b> | <b><i>P</i> value for heterogeneity</b> |
|--------------------------------|-----------------------|---------------------------------------|----------------------------------------|--------------------------------------|--------------------------------------|-----------------------------------------|
| Depression                     | 75                    | 0.862                                 | 0.252                                  | Not detected                         | NA                                   | NA                                      |
| Anxiety                        | 75                    | 0.405                                 | 0.515                                  | Not detected                         | NA                                   | NA                                      |
| Post-traumatic stress symptoms | 28                    | 0.921                                 | 0.785                                  | Not detected                         | NA                                   | NA                                      |
| Stress                         | 22                    | 0.652                                 | 0.914                                  | Not detected                         | NA                                   | NA                                      |
| Psychological distress         | 18                    | 0.544                                 | 0.783                                  | Not detected                         | NA                                   | NA                                      |
| Sleep problems                 | 15                    | 0.488                                 | 0.296                                  | Not detected                         | NA                                   | NA                                      |
| Suicide ideation               | 4                     | 1.000                                 | 0.401                                  | Not detected                         | NA                                   | NA                                      |
| Loneliness                     | 3                     | 0.296                                 | 0.414                                  | Not detected                         | NA                                   | NA                                      |
| Somatic symptoms               | 3                     | 1.000                                 | 0.399                                  | Not detected                         | NA                                   | NA                                      |
| Low wellbeing                  | 3                     | 1.000                                 | 0.589                                  | Not detected                         | NA                                   | NA                                      |
| Alcohol drinking problems      | 2                     | NA                                    | NA                                     | Not detected                         | NA                                   | NA                                      |
| Obsessive compulsive symptoms  | 2                     | NA                                    | NA                                     | Not detected                         | NA                                   | NA                                      |
| Panic disorder                 | 1                     | NA                                    | NA                                     | NA                                   | NA                                   | NA                                      |
| Phobia anxiety                 | 1                     | NA                                    | NA                                     | NA                                   | NA                                   | NA                                      |
| Adjustment disorder            | 1                     | NA                                    | NA                                     | NA                                   | NA                                   | NA                                      |
| Suicide attempts               | 1                     | NA                                    | NA                                     | NA                                   | NA                                   | NA                                      |

<sup>†</sup>Calibration for publication was carried out, if indicated in trim and fill analysis.

Abbreviations: CI, confidence interval; NA, not applicable.

**Figure S1** Study Selection

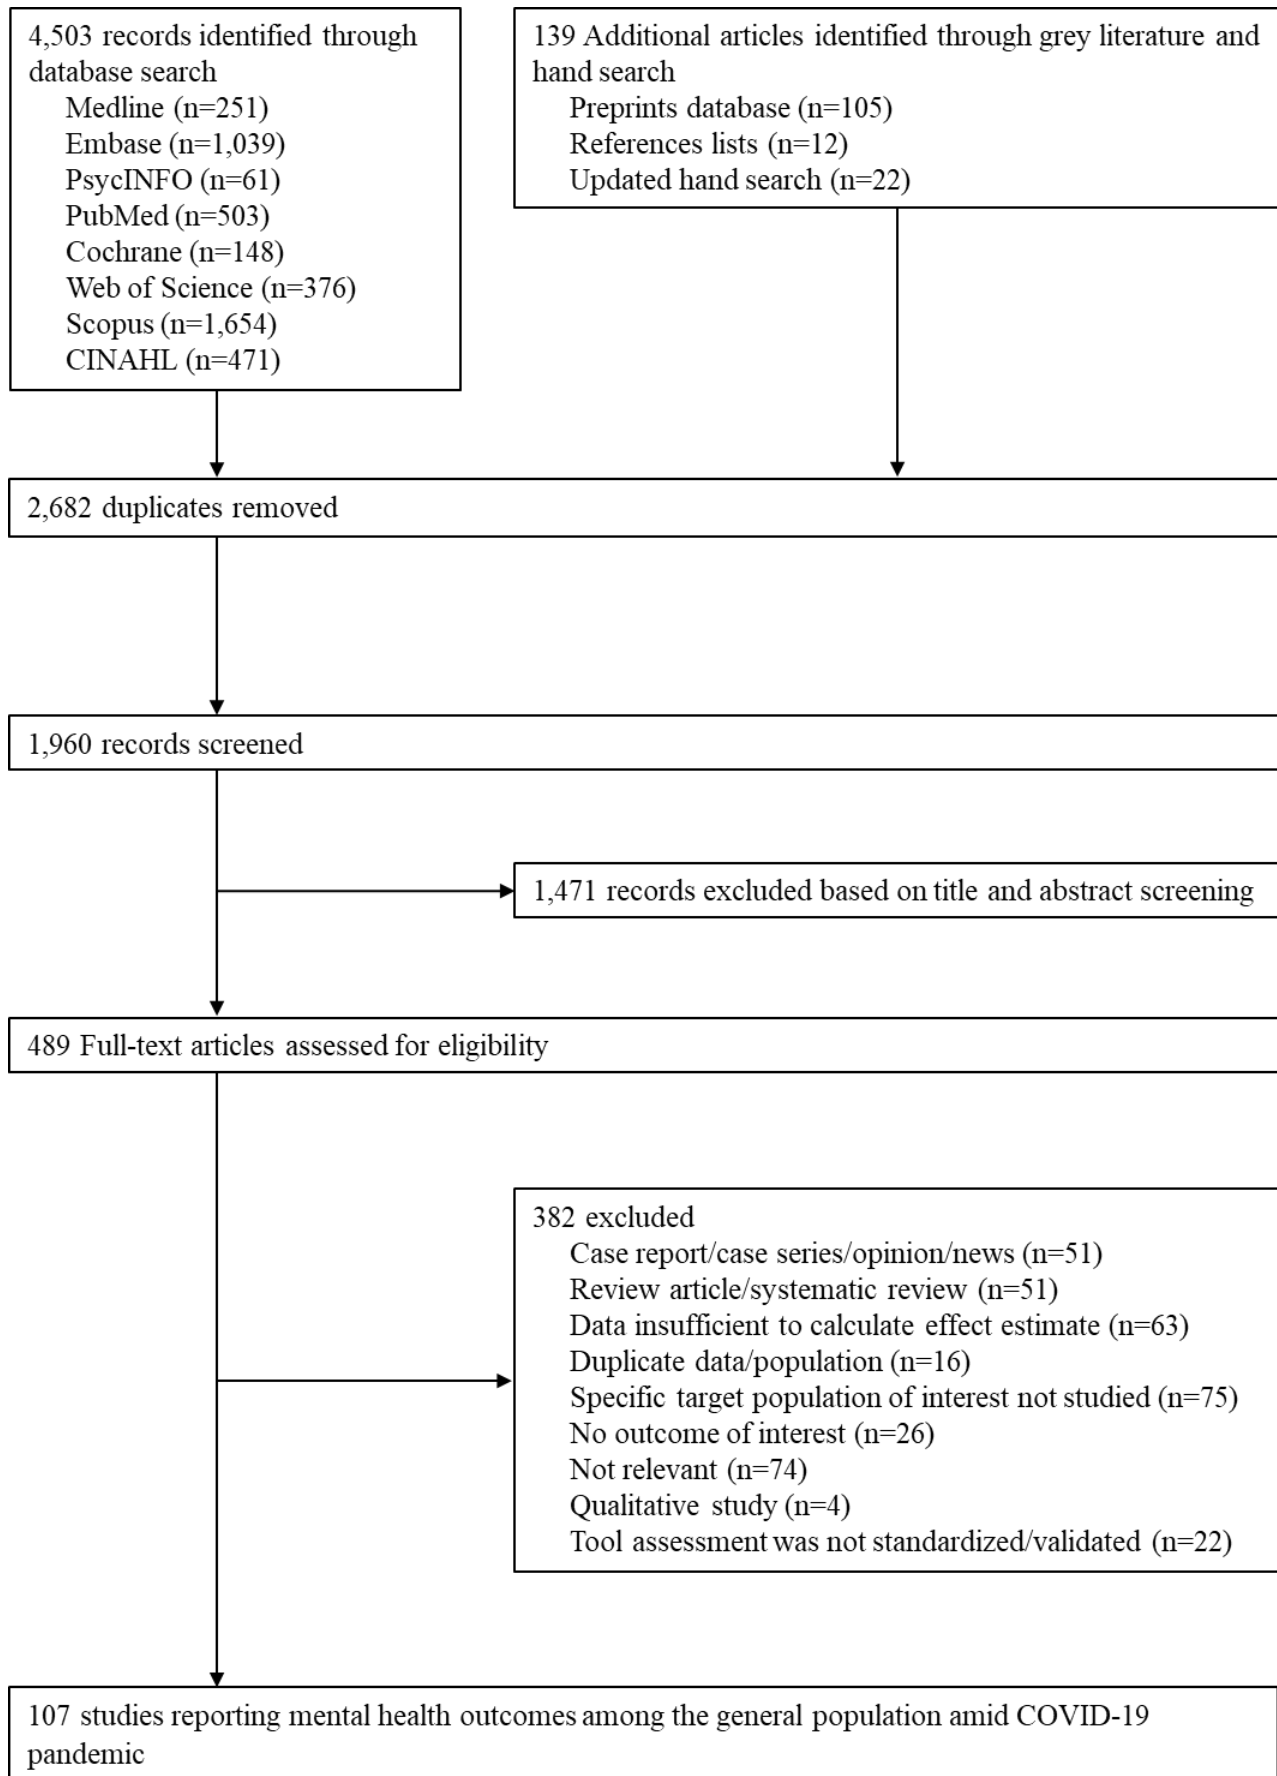

Abbreviation: COVID-19, coronavirus disease-2019.

**Figure S2** Funnel Plot of Included Studies in the Meta-Analysis

(A) Depression

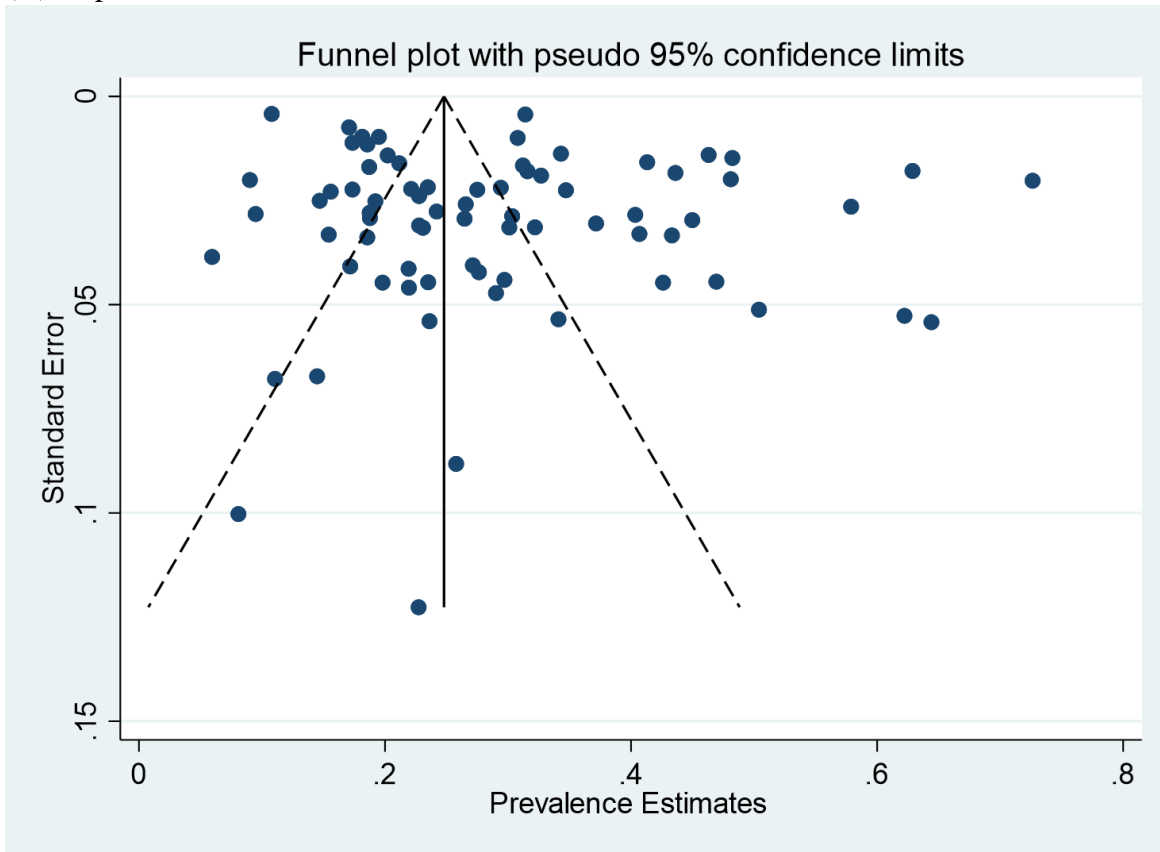

(B) Anxiety

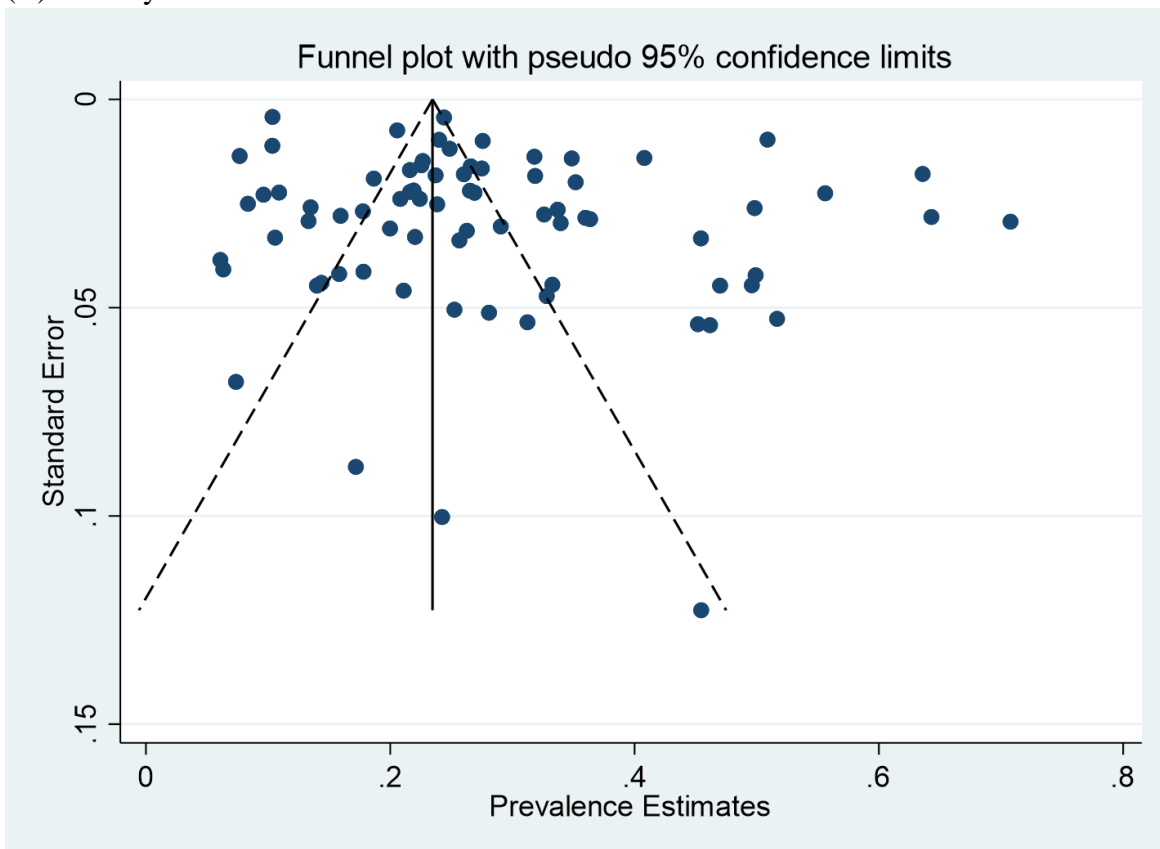

**Figure S2** Funnel Plot of Included Studies in the Meta-Analysis (Continued)

(C) Post-traumatic stress symptoms

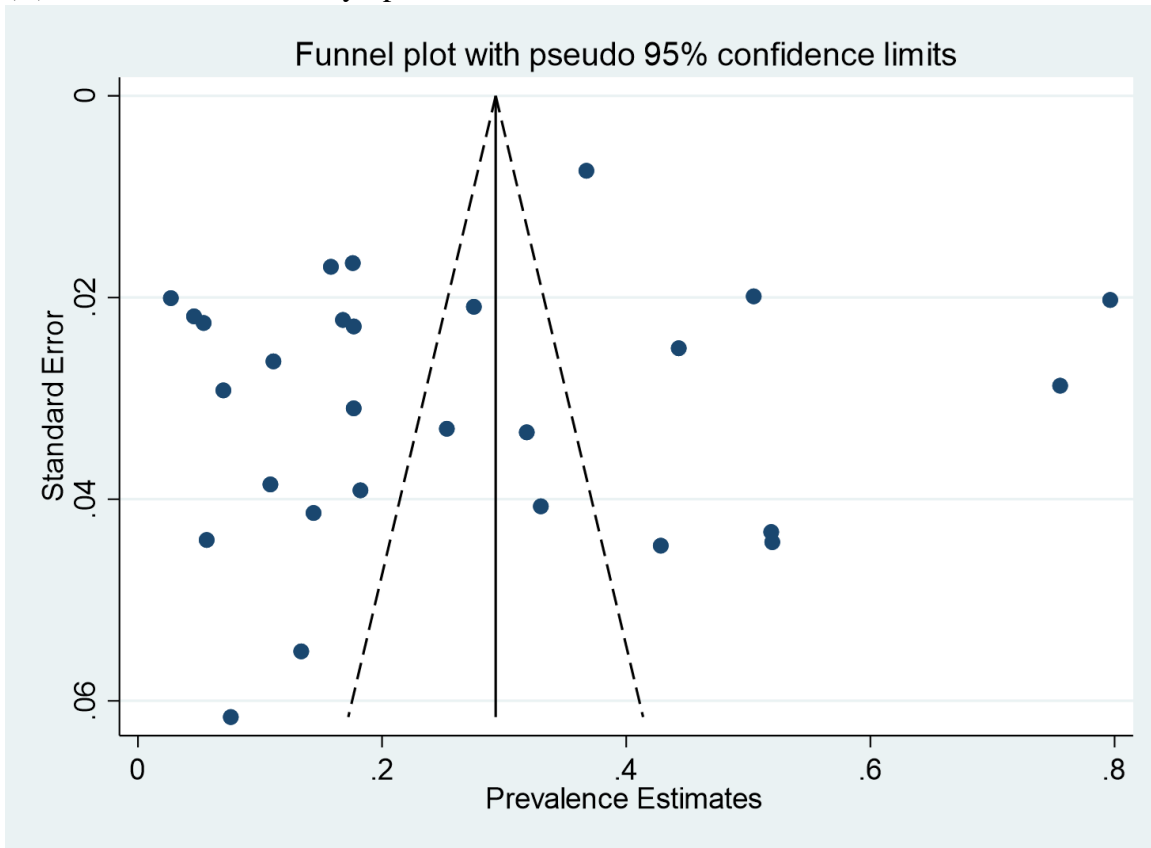

(D) Stress

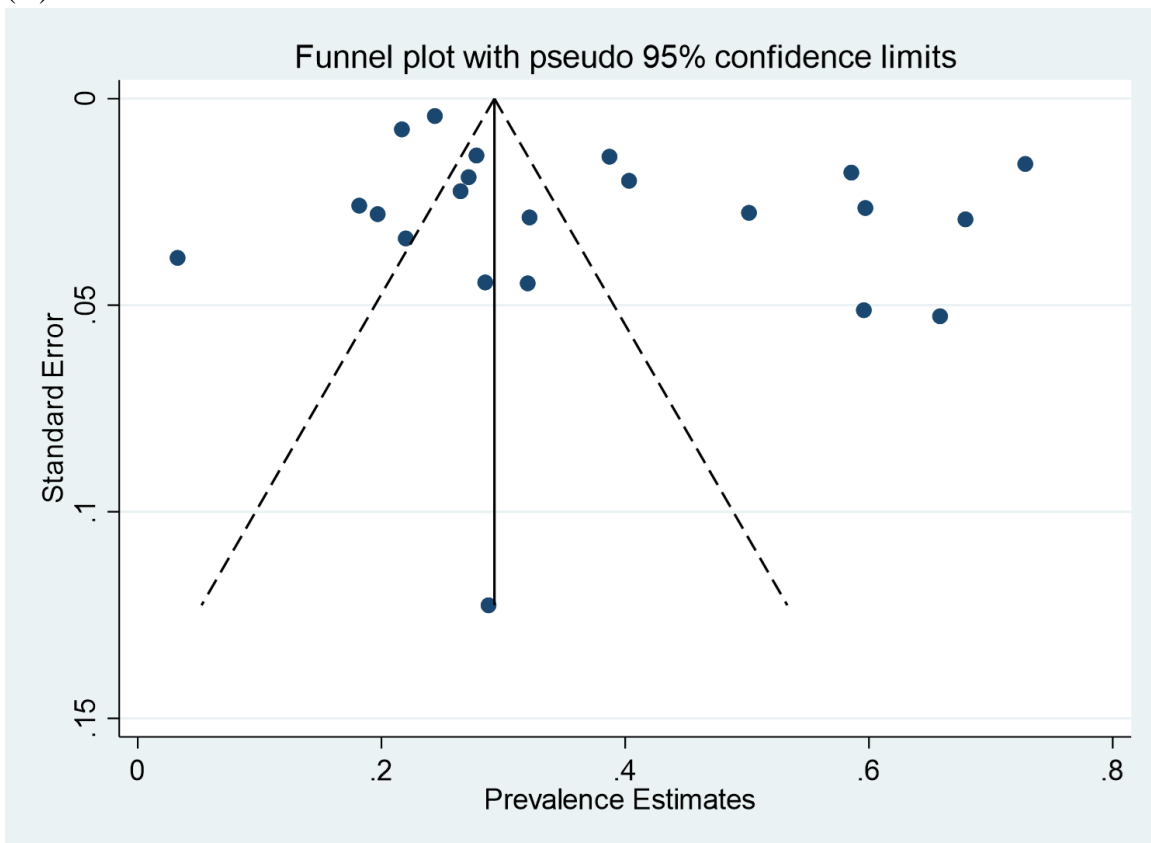



**Figure S2** Funnel Plot of Included Studies in the Meta-Analysis (Continued)

(E) Psychological distress

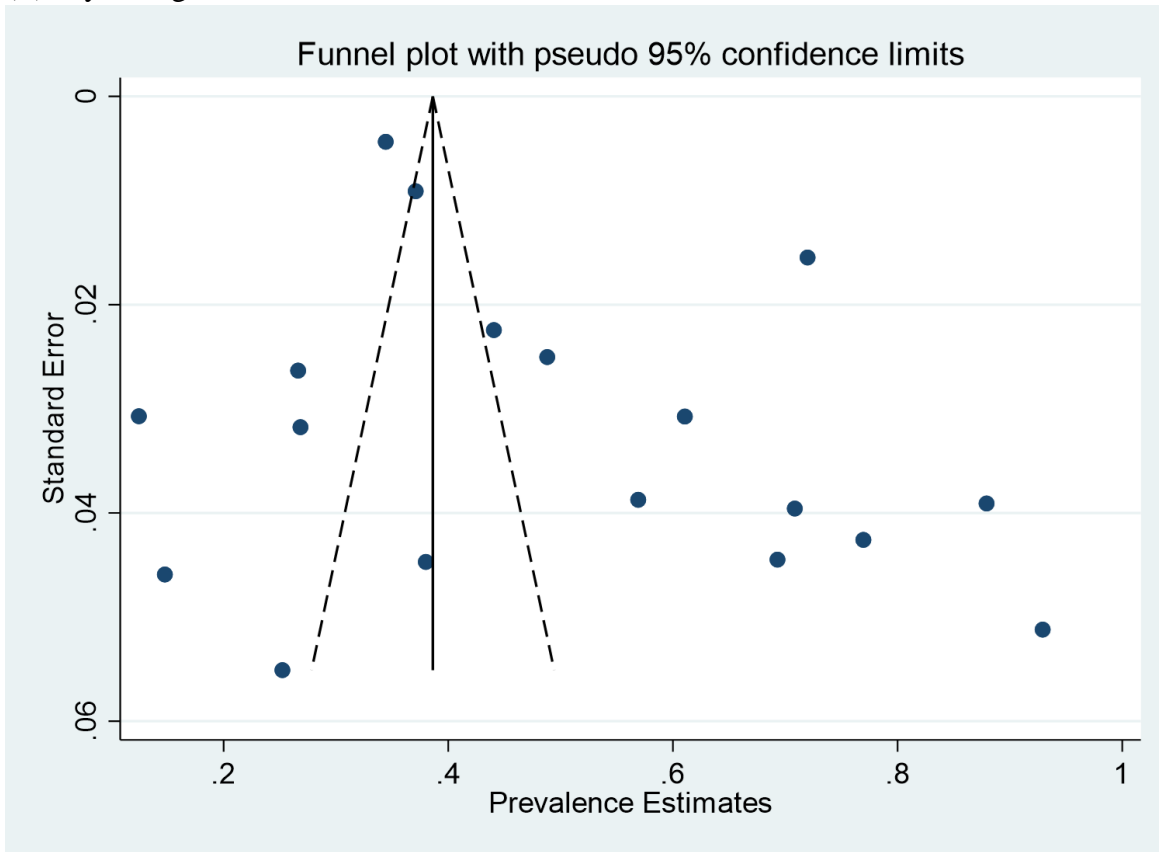

(F) Sleep problems

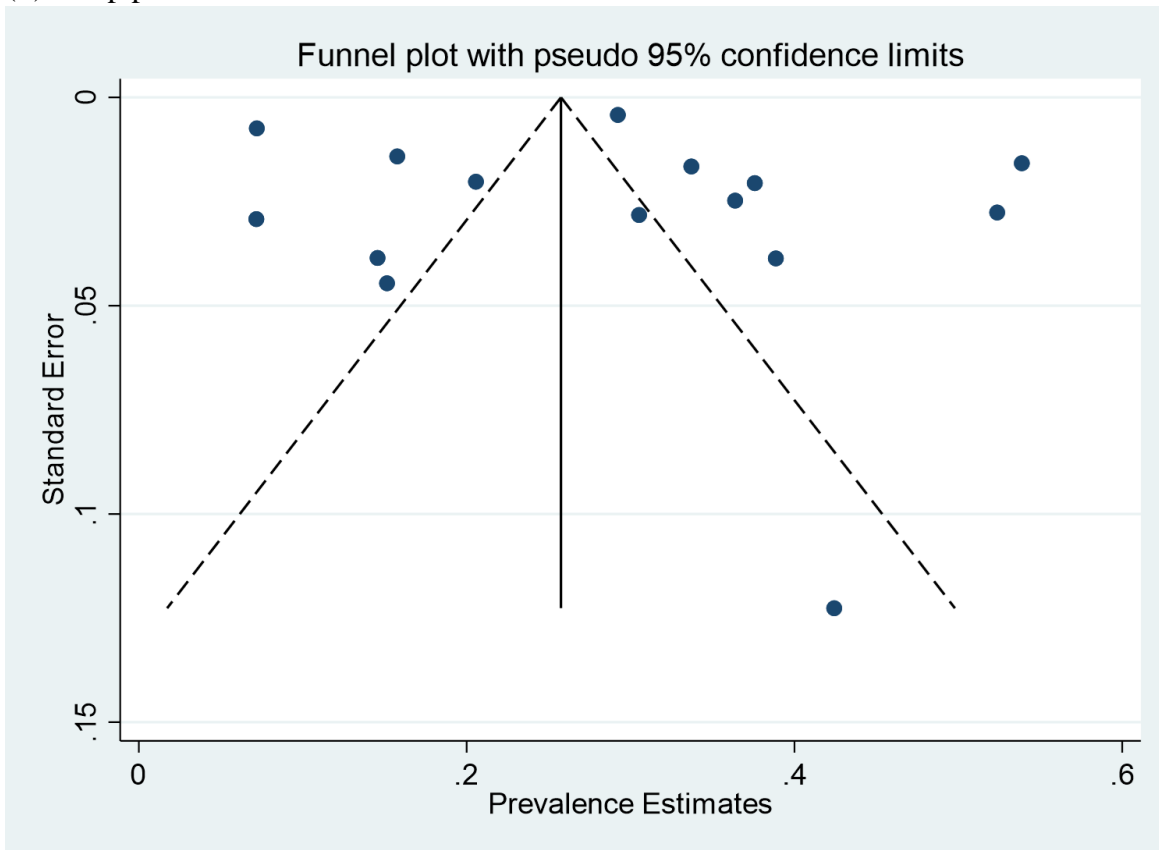

Supplement: 41598_2021_89700_MOESM1_ESM.pdf [file 41598_2021_89700_MOESM1_ESM.pdf]
